# Supplementary material for: MUG-Mel2, a novel highly pigmented and well characterized NRAS mutated human melanoma cell line
Source: PubMed Central journal article supplement (PMC5437015; doi:10.1038/s41598-017-02197-y), 2017-05-18
Supplement: 41598_2017_2197_MOESM1_ESM.pdf [file 41598_2017_2197_MOESM1_ESM.pdf]

SREP-17-05070

**MUG-Mel2, a novel highly pigmented and well characterized NRAS mutated human melanoma cell line**

Beate Rinner<sup>1\*#</sup>, Greta Gandolfi<sup>2\*</sup>, Katharina Meditz<sup>1</sup>, Marie-Therese Frisch<sup>1</sup>, Karin Wagner<sup>3</sup>, Alessia Ciarrocchi<sup>2</sup>, Federica Torricelli<sup>2</sup>, Raili Koivuniemi<sup>4</sup>, Johanna Niklander<sup>4</sup>, Bernadette Liegl-Atzwanger<sup>5</sup>, Birgit Lohberger<sup>6</sup>, Ellen Heitzer<sup>7</sup>, Nassim Ghaffari-Tabrizi-Wizsy<sup>8</sup>, Dagmar Zweytick<sup>9</sup>, Iris Zalaudek<sup>10</sup>

<sup>1</sup> Division of Biomedical Research. Medical University Graz. Graz. Austria

<sup>2</sup> Laboratorio di Ricerca Traslazionale Arcispedale S. Maria Nuova - IRCCS. Reggio Emilia. Italy

<sup>3</sup> Center for Medical Research. Medical University of Graz. Graz. Austria

<sup>4</sup> Institute of Biomedicine/Biochemistry and Developmental Biology. University of Helsinki. Helsinki. Finland

<sup>5</sup> Institute of Pathology. Medical University of Graz. Graz. Austria

<sup>6</sup> Department of Orthopedic Surgery. Medical University of Graz. Graz. Austria

<sup>7</sup> Institute of Human Genetics. Medical University of Graz. Graz. Austria

<sup>8</sup> In SFL Chicken CAM Lab. Institute of Pathophysiology and Immunology. Medical University of Graz. Graz. Austria

<sup>9</sup> Institute of Molecular Biosciences. Biophysics Division. University of Graz. Graz. Austria

<sup>10</sup> Division of Dermatology. Graz. Medical University Graz. Graz. Austria

\*authors contributed equally

**#Corresponding author:** Asst. Prof. Priv. -Doz. Dr. Beate Rinner

Division of Biomedical Research. Medical University of Graz

Roseggerweg 48. A-8036 Graz. Austria

Tel.: +43 316 385 73524

Fax.: +43 316 385 73009

email: [beate.rinner@medunigraz.at](mailto:beate.rinner@medunigraz.at)

**Key words:** melanoma. NRAS mutation. exome-sequencing. DNA damage. NFC hydrogel

## **Supplementary materials**

### **Figure legends**

**Supplemented Figure S1:** MUG-Mel2 showed a variety of CNA frequently occurring in melanoma. publicly available copy number data from Progenetix database.

**Supplemental Table S1:** STR genotype of the patient tumour tissue and two different passages of MUG-Mel2 (p9 and p60) cell line.

**Supplemental Table S2:** Focal amplifications of genes in MUG-Mel2 involved in RAS/RAF pathway

**Supplemental Table S3:** List of the mutated genes by targeted exome sequencing analysis of MUG-Mel2 cell line. For each gene, the number of total mutations, the number of damaging mutations (including missense, frameshift and nonsense), the total length of the gene region targeted by the sequencing, and the mutational burden expressed as the number of total mutation/kb and number of damaging mutations/kb is reported.

**Supplemental Table S4:** List of the 647 somatic mutations found by targeted exomes sequencing in MUG-Mel2 cell line.

**Supplemental Table S5:** Frequency of mutations of 50 representative mutations across passages 9 and 60 of MUG-Mel2 cell line.

## Figures and Tables

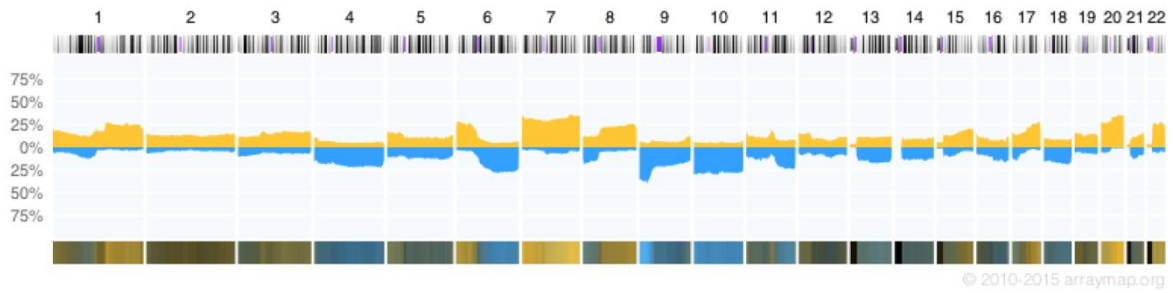

**Figure 1**

| STR-Locus  | tissue   | MUG-Mel2 (p9) | MUG-Mel2 (p60) |
|------------|----------|---------------|----------------|
| D3S1358    | 14.15    | 14.15         | 14.15          |
| TH01       | 10       | 10            | 9.3            |
| D21S11     | 29. 31.2 | 29. 31.2      | 29. 31.2       |
| D18S51     | 13.18    | 12            | 13             |
| Penta E    | 7.14     | 7.14          | 7.14           |
| D5S818     | 12.13    | 12            | 12             |
| D13S317    | 12       | 12            | 12             |
| D7S820     | 10.11    | 10.11         | 10.11          |
| D16S539    | 10.11    | 10.11         | 10.11          |
| CSF1PO     | 11       | 11            | 11             |
| Penta D    | 9.13     | 9.13          | 9.13           |
| Amelogenin | X.Y      | X.Y           | X              |
| vWA        | 15.17    | 15.17         | 15.17          |
| D8S1179    | 13.15    | 13.15         | 13.15          |
| TPOX       | 9.11     | 9.11          | 9.11           |
| FGA        | 22. 23.2 | 22            | 22             |

**Table S1**

| Location                           | Chromosome | Start     | End       | Size [Mb] | Log2 Ratio | CN   |
|------------------------------------|------------|-----------|-----------|-----------|------------|------|
| AKT1 at chr14:105235687-105262080  | chr14      | 102402822 | 106324231 | 3.92      | -0.42      | 1.50 |
| BRAF at chr7:140433813-140624564   | chr7       | 102768975 | 159071691 | 56.30     | 0.5352     | 2.90 |
| EGFR at chr7:55086725-55238738     | chr7       | 6781474   | 55605006  | 48.82     | 0.5558     | 2.94 |
| KRAS at chr12:25357723-25403865    | chr12      | 8149873   | 31383502  | 23.23     | 0.5396     | 2.91 |
| MAPK1 at chr22:22123319-22221970   | chr15      | 0         | 20174282  | 20.17     | 0.1012     | 2.15 |
| MAPK2 at chr22:22127162-22160276   | chr22      | 0         | 51176570  | 51.18     | 0.00       | 1.99 |
| MAPK3 at chr16:30125426-30134630   | chr16      | 0         | 5081019   | 5.08      | 0.3128     | 2.48 |
| MAPK4 at chr18:48086484-48258196   | chr18      | 0         | 76995117  | 77.00     | -0.4090    | 1.51 |
| MAPK6 at chr15:52311411-52358462   | chr15      | 42037830  | 52393746  | 10.36     | 0.2456     | 2.37 |
| MAPK7 at chr17:19281774-19286857   | chr17      | 0         | 20520571  | 20.52     | -0.5072    | 1.41 |
| MAPK8 at chr10:49514682-49647402   | chr10      | 47675521  | 50046852  | 2.37      | -0.5136    | 1.40 |
| MAPK9 at chr5:179660595-179719071  | chr5       | 59327199  | 180730344 | 121.40    | -0.4132    | 1.50 |
| MAPK10 at chr4:86933449-87292020   | chr4       | 70256443  | 190955048 | 120.70    | -0.4275    | 1.49 |
| MAPK11 at chr22:50702142-50708822  | chr15      | 0         | 20174282  | 20.17     | 0.1012     | 2.15 |
| MAPK12 at chr22:50691330-50700239  | chr15      | 0         | 20174282  | 20.17     | 0.1012     | 2.15 |
| MAPK13 at chr6:36098261-36112301   | chr6       | 33104000  | 37505569  | 4.40      | 0.0889     | 2.13 |
| MAPK14 at chr6:35995454-36079013   | chr6       | 33104000  | 37505569  | 4.40      | 0.0889     | 2.13 |
| MAPK15 at chr8:144798507-144804633 | chr8       | 141381954 | 146247376 | 4.87      | 0.3799     | 2.60 |
| MEK at chr15:66727375-66782101     | chr15      | 0         | 20174282  | 20.17     | 0.1012     | 2.15 |
| NRAS at chr1:115247085-115259515   | chr1       | 11109512  | 14129531  | 3.02      | -0.4828    | 1.43 |
| PIK3CA at chr3:178866311-178957881 | chr3       | 162627563 | 197857588 | 35.23     | 0.54       | 2.91 |

**Table S2**

| Gene     | N of mutation | N of damaging mutations | Total target length | Total mutation burden(mut per 1Kb) | Damaging mutation burden (mut per 1Kb) |
|----------|---------------|-------------------------|---------------------|------------------------------------|----------------------------------------|
| KIR2DL1  | 16            | 8                       | 1036                | 15.4                               | 7.7                                    |
| KIR2DL3  | 8             | 5                       | 722                 | 11.1                               | 6.9                                    |
| AQP7     | 8             | 4                       | 679                 | 11.8                               | 5.9                                    |
| HLA-DRB5 | 9             | 4                       | 693                 | 13.0                               | 5.8                                    |
| SAA2     | 2             | 2                       | 381                 | 5.2                                | 5.2                                    |
| HLA-A    | 5             | 4                       | 812                 | 6.2                                | 4.9                                    |
| KIR3DL1  | 9             | 6                       | 1323                | 6.8                                | 4.5                                    |
| HLA-DPB1 | 7             | 3                       | 769                 | 9.1                                | 3.9                                    |
| HLA-C    | 2             | 1                       | 271                 | 7.4                                | 3.7                                    |
| CCL22    | 1             | 1                       | 276                 | 3.6                                | 3.6                                    |
| HLA-DRB1 | 3             | 2                       | 592                 | 5.1                                | 3.4                                    |
| MICA     | 4             | 4                       | 1190                | 3.4                                | 3.4                                    |
| PRB3     | 1             | 1                       | 306                 | 3.3                                | 3.3                                    |
| FRG1     | 7             | 5                       | 1593                | 4.4                                | 3.1                                    |
| TPSB2    | 2             | 2                       | 819                 | 2.4                                | 2.4                                    |
| HLA-DQB1 | 1             | 1                       | 412                 | 2.4                                | 2.4                                    |
| LHB      | 1             | 1                       | 426                 | 2.3                                | 2.3                                    |
| CDA      | 1             | 1                       | 441                 | 2.3                                | 2.3                                    |
| GYPA     | 1             | 1                       | 453                 | 2.2                                | 2.2                                    |
| NINJ1    | 1             | 1                       | 453                 | 2.2                                | 2.2                                    |
| NDUFA6   | 1             | 1                       | 465                 | 2.2                                | 2.2                                    |
| LOR      | 3             | 2                       | 939                 | 3.2                                | 2.1                                    |
| IL17F    | 1             | 1                       | 492                 | 2.0                                | 2.0                                    |
| MUC7     | 2             | 2                       | 1129                | 1.8                                | 1.8                                    |
| IFNA10   | 1             | 1                       | 566                 | 1.8                                | 1.8                                    |
| NRAS     | 1             | 1                       | 570                 | 1.8                                | 1.8                                    |
| MUC3A    | 1             | 1                       | 608                 | 1.6                                | 1.6                                    |
| CD177    | 2             | 2                       | 1302                | 1.5                                | 1.5                                    |
| CIDEA    | 1             | 1                       | 652                 | 1.5                                | 1.5                                    |
| GJC2     | 2             | 2                       | 1320                | 1.5                                | 1.5                                    |
| CD79B    | 1             | 1                       | 693                 | 1.4                                | 1.4                                    |
| MGMT     | 1             | 1                       | 709                 | 1.4                                | 1.4                                    |
| TM4SF19  | 1             | 1                       | 726                 | 1.4                                | 1.4                                    |
| EMG1     | 2             | 1                       | 733                 | 2.7                                | 1.4                                    |
| TMEM216  | 1             | 1                       | 734                 | 1.4                                | 1.4                                    |
| TPTE     | 3             | 2                       | 1540                | 1.9                                | 1.3                                    |
| CYP4F2   | 2             | 2                       | 1548                | 1.3                                | 1.3                                    |
| CA2      | 1             | 1                       | 783                 | 1.3                                | 1.3                                    |
| FCGR3B   | 2             | 1                       | 802                 | 2.5                                | 1.2                                    |
| HYDIN    | 33            | 17                      | 14357               | 2.3                                | 1.2                                    |
| DLX5     | 1             | 1                       | 864                 | 1.2                                | 1.2                                    |
| OTX2     | 1             | 1                       | 894                 | 1.1                                | 1.1                                    |
| DNASE1L3 | 1             | 1                       | 907                 | 1.1                                | 1.1                                    |
| SMUG1    | 1             | 1                       | 933                 | 1.1                                | 1.1                                    |
| EDA2R    | 1             | 1                       | 948                 | 1.1                                | 1.1                                    |
| CLEC11A  | 1             | 1                       | 965                 | 1.0                                | 1.0                                    |
| CD207    | 1             | 1                       | 987                 | 1.0                                | 1.0                                    |
| RRH      | 1             | 1                       | 1014                | 1.0                                | 1.0                                    |
| WDR45B   | 1             | 1                       | 1035                | 1.0                                | 1.0                                    |
| GALE     | 1             | 1                       | 1047                | 1.0                                | 1.0                                    |
| SETD8    | 2             | 1                       | 1048                | 1.9                                | 1.0                                    |

|          |   |   |      |     |     |
|----------|---|---|------|-----|-----|
| ABHD5    | 1 | 1 | 1050 | 1.0 | 1.0 |
| NBPF1    | 4 | 3 | 3159 | 1.3 | 0.9 |
| ZPBP     | 1 | 1 | 1056 | 0.9 | 0.9 |
| LRPAP1   | 1 | 1 | 1063 | 0.9 | 0.9 |
| CCRL2    | 1 | 1 | 1066 | 0.9 | 0.9 |
| ZDHHC15  | 1 | 1 | 1077 | 0.9 | 0.9 |
| FFAR4    | 1 | 1 | 1086 | 0.9 | 0.9 |
| KIR2DL4  | 3 | 1 | 1122 | 2.7 | 0.9 |
| APOBEC3B | 1 | 1 | 1138 | 0.9 | 0.9 |
| NR1I3    | 1 | 1 | 1169 | 0.9 | 0.9 |
| MTFMT    | 1 | 1 | 1170 | 0.9 | 0.9 |
| NCF1     | 1 | 1 | 1173 | 0.9 | 0.9 |
| KCNJ9    | 1 | 1 | 1177 | 0.8 | 0.8 |
| TNFAIP3  | 2 | 2 | 2362 | 0.8 | 0.8 |
| NPSR1    | 1 | 1 | 1209 | 0.8 | 0.8 |
| GOT1     | 1 | 1 | 1230 | 0.8 | 0.8 |
| SERPINH1 | 1 | 1 | 1257 | 0.8 | 0.8 |
| GATM     | 1 | 1 | 1272 | 0.8 | 0.8 |
| NCF4     | 1 | 1 | 1309 | 0.8 | 0.8 |
| GATA4    | 1 | 1 | 1329 | 0.8 | 0.8 |
| KIR3DL2  | 2 | 1 | 1356 | 1.5 | 0.7 |
| ADAM19   | 2 | 2 | 2731 | 0.7 | 0.7 |
| ODC1     | 1 | 1 | 1373 | 0.7 | 0.7 |
| FGG      | 1 | 1 | 1377 | 0.7 | 0.7 |
| SERPINC1 | 1 | 1 | 1395 | 0.7 | 0.7 |
| MMP12    | 2 | 1 | 1399 | 1.4 | 0.7 |
| GTF2IRD2 | 3 | 2 | 2832 | 1.1 | 0.7 |
| CYP2C9   | 1 | 1 | 1473 | 0.7 | 0.7 |
| GRIA3    | 3 | 2 | 2966 | 1.0 | 0.7 |
| SERPINF2 | 1 | 1 | 1486 | 0.7 | 0.7 |
| ANXA11   | 2 | 1 | 1501 | 1.3 | 0.7 |
| CYP24A1  | 1 | 1 | 1545 | 0.6 | 0.6 |
| KCNJ3    | 1 | 1 | 1562 | 0.6 | 0.6 |
| SLC1A1   | 2 | 1 | 1575 | 1.3 | 0.6 |
| RPE65    | 1 | 1 | 1602 | 0.6 | 0.6 |
| MAVS     | 1 | 1 | 1614 | 0.6 | 0.6 |
| LIFR     | 2 | 2 | 3294 | 0.6 | 0.6 |
| TROVE2   | 1 | 1 | 1647 | 0.6 | 0.6 |
| SCARB1   | 1 | 1 | 1650 | 0.6 | 0.6 |
| MCCC2    | 1 | 1 | 1692 | 0.6 | 0.6 |
| GAD2     | 1 | 1 | 1739 | 0.6 | 0.6 |
| CD96     | 1 | 1 | 1758 | 0.6 | 0.6 |
| TAF15    | 1 | 1 | 1779 | 0.6 | 0.6 |
| UNC93B1  | 1 | 1 | 1793 | 0.6 | 0.6 |
| GPI      | 1 | 1 | 1794 | 0.6 | 0.6 |
| TOX3     | 2 | 1 | 1795 | 1.1 | 0.6 |
| PPM1D    | 1 | 1 | 1809 | 0.6 | 0.6 |
| ACSM3    | 1 | 1 | 1835 | 0.5 | 0.5 |
| COG8     | 1 | 1 | 1839 | 0.5 | 0.5 |
| SIGLEC12 | 2 | 1 | 1850 | 1.1 | 0.5 |
| GP6      | 1 | 1 | 1863 | 0.5 | 0.5 |
| HSPA1L   | 1 | 1 | 1922 | 0.5 | 0.5 |
| KRT1     | 1 | 1 | 1935 | 0.5 | 0.5 |
| GP1BA    | 1 | 1 | 1959 | 0.5 | 0.5 |
| SLC34A2  | 2 | 1 | 2073 | 1.0 | 0.5 |
| SLCO1B3  | 1 | 1 | 2092 | 0.5 | 0.5 |

|          |   |   |      |     |     |
|----------|---|---|------|-----|-----|
| TPRN     | 1 | 1 | 2136 | 0.5 | 0.5 |
| KEL      | 1 | 1 | 2199 | 0.5 | 0.5 |
| MPO      | 1 | 1 | 2238 | 0.4 | 0.4 |
| SYTL5    | 1 | 1 | 2239 | 0.4 | 0.4 |
| RXFP2    | 1 | 1 | 2265 | 0.4 | 0.4 |
| CEL      | 3 | 1 | 2271 | 1.3 | 0.4 |
| MLH1     | 1 | 1 | 2283 | 0.4 | 0.4 |
| ANKK1    | 1 | 1 | 2287 | 0.4 | 0.4 |
| APP      | 1 | 1 | 2355 | 0.4 | 0.4 |
| COG4     | 1 | 1 | 2370 | 0.4 | 0.4 |
| CDH8     | 1 | 1 | 2386 | 0.4 | 0.4 |
| PLG      | 1 | 1 | 2437 | 0.4 | 0.4 |
| SELP     | 1 | 1 | 2474 | 0.4 | 0.4 |
| ATP6V0A1 | 1 | 1 | 2511 | 0.4 | 0.4 |
| TAS1R1   | 1 | 1 | 2517 | 0.4 | 0.4 |
| ESPN     | 1 | 1 | 2565 | 0.4 | 0.4 |
| FMN2     | 5 | 2 | 5148 | 1.0 | 0.4 |
| BCL11A   | 1 | 1 | 2599 | 0.4 | 0.4 |
| GRM6     | 2 | 1 | 2634 | 0.8 | 0.4 |
| PKP2     | 1 | 1 | 2646 | 0.4 | 0.4 |
| PRKD3    | 1 | 1 | 2652 | 0.4 | 0.4 |
| ACTN2    | 2 | 1 | 2685 | 0.7 | 0.4 |
| PRDM9    | 1 | 1 | 2685 | 0.4 | 0.4 |
| DPP6     | 1 | 1 | 2706 | 0.4 | 0.4 |
| ITIH1    | 1 | 1 | 2711 | 0.4 | 0.4 |
| HK2      | 1 | 1 | 2754 | 0.4 | 0.4 |
| ZC3H3    | 1 | 1 | 2832 | 0.4 | 0.4 |
| PMS2     | 1 | 1 | 2836 | 0.4 | 0.4 |
| MIA3     | 2 | 2 | 5693 | 0.4 | 0.4 |
| WDR36    | 1 | 1 | 2856 | 0.4 | 0.4 |
| GRIK1    | 1 | 1 | 2889 | 0.3 | 0.3 |
| TRPC5    | 1 | 1 | 2909 | 0.3 | 0.3 |
| DDX11    | 2 | 1 | 2918 | 0.7 | 0.3 |
| SRGAP2   | 3 | 1 | 2933 | 1.0 | 0.3 |
| NEFH     | 1 | 1 | 3063 | 0.3 | 0.3 |
| NLRP3    | 1 | 1 | 3111 | 0.3 | 0.3 |
| AP3B1    | 1 | 1 | 3285 | 0.3 | 0.3 |
| SPINK5   | 1 | 1 | 3297 | 0.3 | 0.3 |
| GRIN3A   | 1 | 1 | 3348 | 0.3 | 0.3 |
| JAK2     | 1 | 1 | 3373 | 0.3 | 0.3 |
| COL6A2   | 1 | 1 | 3382 | 0.3 | 0.3 |
| ZAN      | 2 | 2 | 6936 | 0.3 | 0.3 |
| WDR35    | 1 | 1 | 3546 | 0.3 | 0.3 |
| TYK2     | 1 | 1 | 3564 | 0.3 | 0.3 |
| PER3     | 1 | 1 | 3582 | 0.3 | 0.3 |
| TAF2     | 1 | 1 | 3600 | 0.3 | 0.3 |
| CTC1     | 1 | 1 | 3628 | 0.3 | 0.3 |
| ZNF804A  | 2 | 1 | 3630 | 0.6 | 0.3 |
| PML      | 1 | 1 | 3658 | 0.3 | 0.3 |
| ADAMTS18 | 1 | 1 | 3666 | 0.3 | 0.3 |
| PEX19    | 1 | 1 | 3693 | 0.3 | 0.3 |
| TRIOBP   | 2 | 2 | 7392 | 0.3 | 0.3 |
| ADAMTS2  | 1 | 1 | 3708 | 0.3 | 0.3 |
| PHKA2    | 1 | 1 | 3708 | 0.3 | 0.3 |
| JAG2     | 1 | 1 | 3717 | 0.3 | 0.3 |
| ATP2B2   | 1 | 1 | 3732 | 0.3 | 0.3 |



|          |   |   |       |     |     |
|----------|---|---|-------|-----|-----|
| TRAPPC9  | 1 | 1 | 3741  | 0.3 | 0.3 |
| MAGEL2   | 2 | 1 | 3746  | 0.5 | 0.3 |
| IRS4     | 1 | 1 | 3774  | 0.3 | 0.3 |
| MYO6     | 1 | 1 | 3858  | 0.3 | 0.3 |
| RPGRIP1  | 1 | 1 | 3861  | 0.3 | 0.3 |
| SH3TC2   | 1 | 1 | 3867  | 0.3 | 0.3 |
| PFAS     | 1 | 1 | 3987  | 0.3 | 0.3 |
| MSH6     | 1 | 1 | 4083  | 0.2 | 0.2 |
| MTUS1    | 1 | 1 | 4105  | 0.2 | 0.2 |
| TG       | 2 | 2 | 8307  | 0.2 | 0.2 |
| MST1R    | 1 | 1 | 4180  | 0.2 | 0.2 |
| NPHP4    | 1 | 1 | 4281  | 0.2 | 0.2 |
| PIK3C2G  | 1 | 1 | 4304  | 0.2 | 0.2 |
| ARHGAP31 | 1 | 1 | 4335  | 0.2 | 0.2 |
| PTPRT    | 1 | 1 | 4348  | 0.2 | 0.2 |
| ATP10A   | 1 | 1 | 4476  | 0.2 | 0.2 |
| TRPM2    | 2 | 1 | 4477  | 0.4 | 0.2 |
| TOPBP1   | 1 | 1 | 4539  | 0.2 | 0.2 |
| GOLGA3   | 1 | 1 | 4606  | 0.2 | 0.2 |
| ABCC3    | 1 | 1 | 4631  | 0.2 | 0.2 |
| KMT2C    | 5 | 3 | 13956 | 0.4 | 0.2 |
| IQSEC2   | 1 | 1 | 4689  | 0.2 | 0.2 |
| EIF4G1   | 1 | 1 | 4824  | 0.2 | 0.2 |
| IQGAP3   | 1 | 1 | 4855  | 0.2 | 0.2 |
| CLTCL1   | 2 | 1 | 4888  | 0.4 | 0.2 |
| IQGAP1   | 2 | 1 | 4933  | 0.4 | 0.2 |
| PCNT     | 2 | 2 | 10011 | 0.2 | 0.2 |
| CAMTA1   | 1 | 1 | 5069  | 0.2 | 0.2 |
| LTBP4    | 1 | 1 | 5159  | 0.2 | 0.2 |
| TSC2     | 1 | 1 | 5424  | 0.2 | 0.2 |
| SI       | 2 | 1 | 5484  | 0.4 | 0.2 |
| LAMA5    | 3 | 2 | 11005 | 0.3 | 0.2 |
| GRIN2A   | 2 | 1 | 5646  | 0.4 | 0.2 |
| CUL7     | 1 | 1 | 5929  | 0.2 | 0.2 |
| SCN9A    | 1 | 1 | 5934  | 0.2 | 0.2 |
| CCDC88C  | 1 | 1 | 6087  | 0.2 | 0.2 |
| ANK1     | 1 | 1 | 6114  | 0.2 | 0.2 |
| MYO7B    | 1 | 1 | 6302  | 0.2 | 0.2 |
| DYSF     | 1 | 1 | 6490  | 0.2 | 0.2 |
| DNAH5    | 2 | 2 | 13875 | 0.1 | 0.1 |
| PRPF8    | 1 | 1 | 7008  | 0.1 | 0.1 |
| CACNA1H  | 1 | 1 | 7062  | 0.1 | 0.1 |
| GPR179   | 1 | 1 | 7090  | 0.1 | 0.1 |
| CACNA1C  | 1 | 1 | 7106  | 0.1 | 0.1 |
| PLCE1    | 1 | 1 | 7191  | 0.1 | 0.1 |
| HERC2    | 4 | 2 | 14410 | 0.3 | 0.1 |
| CREBBP   | 2 | 1 | 7329  | 0.3 | 0.1 |
| PTPN13   | 2 | 1 | 7423  | 0.3 | 0.1 |
| NOTCH2   | 2 | 1 | 7469  | 0.3 | 0.1 |
| PCDH15   | 1 | 1 | 7504  | 0.1 | 0.1 |
| COL6A5   | 1 | 1 | 7539  | 0.1 | 0.1 |
| ATR      | 1 | 1 | 7935  | 0.1 | 0.1 |
| CHD6     | 2 | 1 | 8109  | 0.2 | 0.1 |
| NIPBL    | 1 | 1 | 8460  | 0.1 | 0.1 |
| AKAP13   | 1 | 1 | 8548  | 0.1 | 0.1 |
| COL7A1   | 1 | 1 | 8835  | 0.1 | 0.1 |

|          |   |   |        |     |     |
|----------|---|---|--------|-----|-----|
| ATM      | 1 | 1 | 9171   | 0.1 | 0.1 |
| COL6A3   | 1 | 1 | 9581   | 0.1 | 0.1 |
| VPS13A   | 1 | 1 | 9645   | 0.1 | 0.1 |
| RANBP2   | 1 | 1 | 9675   | 0.1 | 0.1 |
| ZFHX4    | 1 | 1 | 10838  | 0.1 | 0.1 |
| PRKDC    | 1 | 1 | 12386  | 0.1 | 0.1 |
| PKD1     | 5 | 1 | 12912  | 0.4 | 0.1 |
| APOB     | 1 | 1 | 13692  | 0.1 | 0.1 |
| NEB      | 2 | 1 | 25683  | 0.1 | 0.0 |
| TTN      | 4 | 4 | 110459 | 0.0 | 0.0 |
| COX7A1   | 1 | 0 | 233    | 4.3 | 0.0 |
| GPX1     | 2 | 0 | 649    | 3.1 | 0.0 |
| MGST2    | 1 | 0 | 444    | 2.3 | 0.0 |
| SPRR3    | 1 | 0 | 506    | 2.0 | 0.0 |
| ARF4     | 1 | 0 | 534    | 1.9 | 0.0 |
| APRT     | 1 | 0 | 548    | 1.8 | 0.0 |
| VCX3A    | 1 | 0 | 556    | 1.8 | 0.0 |
| ALOX5AP  | 1 | 0 | 648    | 1.5 | 0.0 |
| CRP      | 1 | 0 | 670    | 1.5 | 0.0 |
| PMS2P3   | 2 | 0 | 1388   | 1.4 | 0.0 |
| RSPO4    | 1 | 0 | 705    | 1.4 | 0.0 |
| NCR3     | 1 | 0 | 706    | 1.4 | 0.0 |
| PRSS1    | 1 | 0 | 744    | 1.3 | 0.0 |
| B3GALTL  | 2 | 0 | 1497   | 1.3 | 0.0 |
| PGAM2    | 1 | 0 | 762    | 1.3 | 0.0 |
| CIDEC    | 1 | 0 | 786    | 1.3 | 0.0 |
| PNPLA1   | 2 | 0 | 1615   | 1.2 | 0.0 |
| COMT     | 1 | 0 | 816    | 1.2 | 0.0 |
| TTPA     | 1 | 0 | 837    | 1.2 | 0.0 |
| GGT5     | 2 | 0 | 1749   | 1.1 | 0.0 |
| CHDH     | 2 | 0 | 1775   | 1.1 | 0.0 |
| SYNGR1   | 1 | 0 | 897    | 1.1 | 0.0 |
| FCAR     | 1 | 0 | 924    | 1.1 | 0.0 |
| FCGR2A   | 1 | 0 | 944    | 1.1 | 0.0 |
| ANKRD1   | 1 | 0 | 960    | 1.0 | 0.0 |
| PSMD7    | 1 | 0 | 965    | 1.0 | 0.0 |
| TAL1     | 1 | 0 | 990    | 1.0 | 0.0 |
| NEIL2    | 1 | 0 | 1004   | 1.0 | 0.0 |
| PAWR     | 1 | 0 | 1014   | 1.0 | 0.0 |
| TPM2     | 1 | 0 | 1014   | 1.0 | 0.0 |
| CDK7     | 1 | 0 | 1026   | 1.0 | 0.0 |
| GBGT1    | 1 | 0 | 1035   | 1.0 | 0.0 |
| PRPH2    | 1 | 0 | 1041   | 1.0 | 0.0 |
| SUCLG1   | 1 | 0 | 1041   | 1.0 | 0.0 |
| PTGER2   | 1 | 0 | 1072   | 0.9 | 0.0 |
| SERPINB5 | 1 | 0 | 1119   | 0.9 | 0.0 |
| NEU2     | 1 | 0 | 1138   | 0.9 | 0.0 |
| AIPL1    | 1 | 0 | 1155   | 0.9 | 0.0 |
| RASSF1   | 1 | 0 | 1172   | 0.9 | 0.0 |
| BCKDHB   | 1 | 0 | 1179   | 0.8 | 0.0 |
| MAF      | 1 | 0 | 1216   | 0.8 | 0.0 |
| ADORA2A  | 1 | 0 | 1234   | 0.8 | 0.0 |
| SERPINI2 | 1 | 0 | 1236   | 0.8 | 0.0 |
| IDH1     | 1 | 0 | 1245   | 0.8 | 0.0 |
| PSTPIP1  | 1 | 0 | 1251   | 0.8 | 0.0 |
| CPB2     | 1 | 0 | 1258   | 0.8 | 0.0 |

|          |   |   |      |     |     |
|----------|---|---|------|-----|-----|
| STAT6    | 2 | 0 | 2520 | 0.8 | 0.0 |
| GFI1     | 1 | 0 | 1269 | 0.8 | 0.0 |
| PROZ     | 1 | 0 | 1269 | 0.8 | 0.0 |
| C2orf71  | 3 | 0 | 3867 | 0.8 | 0.0 |
| GAL3ST3  | 1 | 0 | 1291 | 0.8 | 0.0 |
| STK11    | 1 | 0 | 1302 | 0.8 | 0.0 |
| PWRN1    | 1 | 0 | 1304 | 0.8 | 0.0 |
| TSPYL1   | 1 | 0 | 1314 | 0.8 | 0.0 |
| CADM1    | 1 | 0 | 1329 | 0.8 | 0.0 |
| ADRA2B   | 1 | 0 | 1344 | 0.7 | 0.0 |
| IFI44L   | 1 | 0 | 1348 | 0.7 | 0.0 |
| AP4M1    | 1 | 0 | 1362 | 0.7 | 0.0 |
| CHRM2    | 1 | 0 | 1401 | 0.7 | 0.0 |
| NEIL1    | 1 | 0 | 1418 | 0.7 | 0.0 |
| KYNU     | 1 | 0 | 1420 | 0.7 | 0.0 |
| HADHB    | 1 | 0 | 1425 | 0.7 | 0.0 |
| ADAMTSL2 | 2 | 0 | 2856 | 0.7 | 0.0 |
| MLYCD    | 1 | 0 | 1482 | 0.7 | 0.0 |
| CYP21A2  | 2 | 0 | 2968 | 0.7 | 0.0 |
| FKRP     | 1 | 0 | 1488 | 0.7 | 0.0 |
| SLC19A3  | 1 | 0 | 1491 | 0.7 | 0.0 |
| CYP2C8   | 1 | 0 | 1498 | 0.7 | 0.0 |
| MUC13    | 1 | 0 | 1522 | 0.7 | 0.0 |
| RPS6KB1  | 1 | 0 | 1572 | 0.6 | 0.0 |
| TXNRD2   | 1 | 0 | 1575 | 0.6 | 0.0 |
| UGT2B7   | 1 | 0 | 1581 | 0.6 | 0.0 |
| CHRNA3   | 1 | 0 | 1586 | 0.6 | 0.0 |
| ICAM1    | 1 | 0 | 1589 | 0.6 | 0.0 |
| NEFL     | 1 | 0 | 1632 | 0.6 | 0.0 |
| ILDR1    | 1 | 0 | 1641 | 0.6 | 0.0 |
| PDPK1    | 1 | 0 | 1654 | 0.6 | 0.0 |
| FOXC1    | 1 | 0 | 1662 | 0.6 | 0.0 |
| CES1     | 1 | 0 | 1707 | 0.6 | 0.0 |
| AMHR2    | 1 | 0 | 1722 | 0.6 | 0.0 |
| YTHDF2   | 1 | 0 | 1732 | 0.6 | 0.0 |
| MYT1L    | 2 | 0 | 3532 | 0.6 | 0.0 |
| MITF     | 1 | 0 | 1786 | 0.6 | 0.0 |
| GALNT9   | 1 | 0 | 1798 | 0.6 | 0.0 |
| GSE1     | 2 | 0 | 3654 | 0.5 | 0.0 |
| PAPSS2   | 1 | 0 | 1860 | 0.5 | 0.0 |
| SLC6A18  | 1 | 0 | 1872 | 0.5 | 0.0 |
| BCR      | 2 | 0 | 3790 | 0.5 | 0.0 |
| SMPD1    | 1 | 0 | 1896 | 0.5 | 0.0 |
| SLC6A8   | 1 | 0 | 1908 | 0.5 | 0.0 |
| RPN2     | 1 | 0 | 1944 | 0.5 | 0.0 |
| HDC      | 1 | 0 | 1989 | 0.5 | 0.0 |
| EOMES    | 1 | 0 | 2052 | 0.5 | 0.0 |
| BMPER    | 1 | 0 | 2058 | 0.5 | 0.0 |
| SLC27A5  | 1 | 0 | 2060 | 0.5 | 0.0 |
| DCLRE1C  | 1 | 0 | 2079 | 0.5 | 0.0 |
| HRC      | 1 | 0 | 2091 | 0.5 | 0.0 |
| TGM6     | 1 | 0 | 2121 | 0.5 | 0.0 |
| FMO6P    | 1 | 0 | 2125 | 0.5 | 0.0 |
| EEF2K    | 1 | 0 | 2158 | 0.5 | 0.0 |
| CEP41    | 3 | 0 | 6554 | 0.5 | 0.0 |
| NDUFS1   | 1 | 0 | 2226 | 0.4 | 0.0 |

|          |   |   |      |     |     |
|----------|---|---|------|-----|-----|
| MYB      | 1 | 0 | 2267 | 0.4 | 0.0 |
| HADHA    | 1 | 0 | 2292 | 0.4 | 0.0 |
| SLC26A6  | 1 | 0 | 2292 | 0.4 | 0.0 |
| SEC23A   | 1 | 0 | 2298 | 0.4 | 0.0 |
| LOXL2    | 1 | 0 | 2309 | 0.4 | 0.0 |
| LMF1     | 2 | 0 | 4674 | 0.4 | 0.0 |
| WT1-AS   | 1 | 0 | 2338 | 0.4 | 0.0 |
| CDH5     | 1 | 0 | 2341 | 0.4 | 0.0 |
| AMT      | 1 | 0 | 2405 | 0.4 | 0.0 |
| TMC6     | 1 | 0 | 2418 | 0.4 | 0.0 |
| SEMA4C   | 1 | 0 | 2485 | 0.4 | 0.0 |
| SETBP1   | 2 | 0 | 4980 | 0.4 | 0.0 |
| HIF1A    | 1 | 0 | 2569 | 0.4 | 0.0 |
| TLR5     | 1 | 0 | 2577 | 0.4 | 0.0 |
| CCHCR1   | 1 | 0 | 2595 | 0.4 | 0.0 |
| LITAF    | 1 | 0 | 2617 | 0.4 | 0.0 |
| GRM3     | 1 | 0 | 2632 | 0.4 | 0.0 |
| FGFR1    | 1 | 0 | 2635 | 0.4 | 0.0 |
| UBE3A    | 1 | 0 | 2648 | 0.4 | 0.0 |
| LAMB1    | 2 | 0 | 5325 | 0.4 | 0.0 |
| LPIN1    | 1 | 0 | 2673 | 0.4 | 0.0 |
| CBL      | 1 | 0 | 2721 | 0.4 | 0.0 |
| RALGDS   | 1 | 0 | 2763 | 0.4 | 0.0 |
| MYO5B    | 2 | 0 | 5547 | 0.4 | 0.0 |
| MSH4     | 1 | 0 | 2788 | 0.4 | 0.0 |
| MAN1B1   | 1 | 0 | 2900 | 0.3 | 0.0 |
| AARS     | 1 | 0 | 2907 | 0.3 | 0.0 |
| PDE11A   | 1 | 0 | 2964 | 0.3 | 0.0 |
| ANO7     | 1 | 0 | 2982 | 0.3 | 0.0 |
| ALG2     | 1 | 0 | 2989 | 0.3 | 0.0 |
| ACAN     | 1 | 0 | 3027 | 0.3 | 0.0 |
| LIG3     | 1 | 0 | 3058 | 0.3 | 0.0 |
| TMPRSS15 | 1 | 0 | 3060 | 0.3 | 0.0 |
| GLDC     | 1 | 0 | 3063 | 0.3 | 0.0 |
| ANO6     | 1 | 0 | 3076 | 0.3 | 0.0 |
| NRP2     | 1 | 0 | 3104 | 0.3 | 0.0 |
| NLRP7    | 1 | 0 | 3114 | 0.3 | 0.0 |
| CLU      | 1 | 0 | 3146 | 0.3 | 0.0 |
| LLGL1    | 1 | 0 | 3170 | 0.3 | 0.0 |
| SP100    | 1 | 0 | 3192 | 0.3 | 0.0 |
| INVS     | 1 | 0 | 3198 | 0.3 | 0.0 |
| CFL2     | 1 | 0 | 3270 | 0.3 | 0.0 |
| USP7     | 1 | 0 | 3275 | 0.3 | 0.0 |
| DISC1    | 1 | 0 | 3277 | 0.3 | 0.0 |
| ADNP     | 1 | 0 | 3303 | 0.3 | 0.0 |
| WWC1     | 1 | 0 | 3334 | 0.3 | 0.0 |
| ZEB1     | 1 | 0 | 3385 | 0.3 | 0.0 |
| CACNA2D4 | 1 | 0 | 3414 | 0.3 | 0.0 |
| TSC1     | 1 | 0 | 3495 | 0.3 | 0.0 |
| LAMB3    | 1 | 0 | 3519 | 0.3 | 0.0 |
| SREBF1   | 1 | 0 | 3534 | 0.3 | 0.0 |
| PLEKHG4  | 1 | 0 | 3576 | 0.3 | 0.0 |
| PLCB4    | 1 | 0 | 3581 | 0.3 | 0.0 |
| TRERF1   | 1 | 0 | 3586 | 0.3 | 0.0 |
| PARD3B   | 1 | 0 | 3592 | 0.3 | 0.0 |
| DIAPH3   | 1 | 0 | 3602 | 0.3 | 0.0 |

|          |   |   |       |     |     |
|----------|---|---|-------|-----|-----|
| ACACB    | 2 | 0 | 7322  | 0.3 | 0.0 |
| WDR11    | 1 | 0 | 3675  | 0.3 | 0.0 |
| COG6     | 1 | 0 | 3696  | 0.3 | 0.0 |
| ERBB2    | 1 | 0 | 3738  | 0.3 | 0.0 |
| CNGB1    | 1 | 0 | 3782  | 0.3 | 0.0 |
| MYBPC3   | 1 | 0 | 3825  | 0.3 | 0.0 |
| NPC1     | 1 | 0 | 3837  | 0.3 | 0.0 |
| CNTNAP5  | 1 | 0 | 3921  | 0.3 | 0.0 |
| PTPRC    | 1 | 0 | 3926  | 0.3 | 0.0 |
| PHLPP2   | 1 | 0 | 3951  | 0.3 | 0.0 |
| GIGYF2   | 1 | 0 | 3966  | 0.3 | 0.0 |
| CNTNAP2  | 1 | 0 | 3996  | 0.3 | 0.0 |
| KIF7     | 1 | 0 | 4032  | 0.2 | 0.0 |
| FAM20A   | 1 | 0 | 4110  | 0.2 | 0.0 |
| ACSF3    | 1 | 0 | 4209  | 0.2 | 0.0 |
| XIAP     | 2 | 0 | 8419  | 0.2 | 0.0 |
| MMAB     | 1 | 0 | 4225  | 0.2 | 0.0 |
| DAPK1    | 1 | 0 | 4265  | 0.2 | 0.0 |
| WNK1     | 2 | 0 | 8643  | 0.2 | 0.0 |
| GRIN2B   | 1 | 0 | 4455  | 0.2 | 0.0 |
| COL5A2   | 1 | 0 | 4500  | 0.2 | 0.0 |
| MAP3K1   | 1 | 0 | 4539  | 0.2 | 0.0 |
| GNAS     | 1 | 0 | 4586  | 0.2 | 0.0 |
| TMCO1    | 1 | 0 | 4650  | 0.2 | 0.0 |
| ALS2     | 1 | 0 | 5052  | 0.2 | 0.0 |
| COL4A4   | 1 | 0 | 5073  | 0.2 | 0.0 |
| UQCRB    | 1 | 0 | 5109  | 0.2 | 0.0 |
| UBR1     | 1 | 0 | 5250  | 0.2 | 0.0 |
| SYT14    | 1 | 0 | 5388  | 0.2 | 0.0 |
| DLG5     | 1 | 0 | 5725  | 0.2 | 0.0 |
| ANAPC1   | 1 | 0 | 5785  | 0.2 | 0.0 |
| MYH15    | 1 | 0 | 5796  | 0.2 | 0.0 |
| MYH7     | 1 | 0 | 5808  | 0.2 | 0.0 |
| DOCK3    | 1 | 0 | 6037  | 0.2 | 0.0 |
| MYPN     | 1 | 0 | 6165  | 0.2 | 0.0 |
| KAT6B    | 1 | 0 | 6222  | 0.2 | 0.0 |
| OTOF     | 1 | 0 | 6319  | 0.2 | 0.0 |
| DOCK9    | 1 | 0 | 6335  | 0.2 | 0.0 |
| MUC5B    | 1 | 0 | 6345  | 0.2 | 0.0 |
| PTPRQ    | 1 | 0 | 6384  | 0.2 | 0.0 |
| F5       | 1 | 0 | 6675  | 0.1 | 0.0 |
| ABCA4    | 1 | 0 | 6822  | 0.1 | 0.0 |
| EFHC1    | 1 | 0 | 6845  | 0.1 | 0.0 |
| FOXP2    | 1 | 0 | 6978  | 0.1 | 0.0 |
| CR1      | 1 | 0 | 7420  | 0.1 | 0.0 |
| CEP290   | 1 | 0 | 7440  | 0.1 | 0.0 |
| MYO18B   | 1 | 0 | 7659  | 0.1 | 0.0 |
| VAPB     | 1 | 0 | 7938  | 0.1 | 0.0 |
| COL6A4P2 | 1 | 0 | 9157  | 0.1 | 0.0 |
| HTT      | 1 | 0 | 9359  | 0.1 | 0.0 |
| CSMD1    | 1 | 0 | 10622 | 0.1 | 0.0 |
| SPTBN5   | 1 | 0 | 10850 | 0.1 | 0.0 |
| SMG1     | 1 | 0 | 10920 | 0.1 | 0.0 |
| ZFH3     | 1 | 0 | 11100 | 0.1 | 0.0 |
| VPS13B   | 1 | 0 | 12255 | 0.1 | 0.0 |
| ALMS1    | 1 | 0 | 12504 | 0.1 | 0.0 |

|              |            |            |                |            |            |
|--------------|------------|------------|----------------|------------|------------|
| DNAH9        | 1          | 0          | 13389          | 0.1        | 0.0        |
| PLEC         | 1          | 0          | 14728          | 0.1        | 0.0        |
| RNF213       | 1          | 0          | 15792          | 0.1        | 0.0        |
| OBSCN        | 1          | 0          | 25109          | 0.0        | 0.0        |
| SYNE1        | 1          | 0          | 26488          | 0.0        | 0.0        |
| <b>total</b> | <b>647</b> | <b>309</b> | <b>1673799</b> | <b>0.4</b> | <b>0.2</b> |

---

**Table S3**

| variant (gene-chrom-pos-nucleotide)           | Gene     | Consequence         | Protein. Position | Amino. Acids | HGVSc nomenclature                          | Transcript     | HGVS mutation            | Protein_seq    | HGVSp nomenclature                      |
|-----------------------------------------------|----------|---------------------|-------------------|--------------|---------------------------------------------|----------------|--------------------------|----------------|-----------------------------------------|
| NPHP4-1-5934950-C>C/T                         | NPHP4    | missense_variant    | 1010              | D/N          | NM_015102.3:c.3028G>A                       | NM_015102.3    | c.3028G>A                | NP_055917.1    | NP_055917.1:p.Asp1010Asn                |
| ESPN-1-6511705-C>C/T                          | ESPN     | missense_variant    | 653               | S/L          | NM_031475.2:c.1958C>T                       | NM_031475.2    | c.1958C>T                | NP_113663.2    | NP_113663.2:p.Ser653Leu                 |
| TAS1R1-1-6638925-C>C/T                        | TAS1R1   | missense_variant    | 603               | R/C          | NM_138697.3:c.1807C>T                       | NM_138697.3    | c.1807C>T                | NP_619642.2    | NP_619642.2:p.Arg603Cys                 |
| CAMTA1-1-7724050-G>G/A                        | CAMTA1   | missense_variant    | 481               | M/I          | NM_015215.2:c.1443G>A                       | NM_015215.2    | c.1443G>A                | NP_056030.1    | NP_056030.1:p.Met481Ile                 |
| PER3-1-7890053-G>G/A                          | PER3     | missense_variant    | 1007              | A/T          | NM_016831.1:c.3019G>A                       | NM_016831.1    | c.3019G>A                | NP_058515.1    | NP_058515.1:p.Ala1007Thr                |
| NBPF1-1-16893721-A>A/C                        | NBPF1    | missense_variant    | 931               | F/C          | NM_017940.3:c.2792T>G                       | NM_017940.3    | c.2792T>G                | NP_060410.2    | NP_060410.2:p.Phe931Cys                 |
| NBPF1-1-16895634-T>T/G                        | NBPF1    | missense_variant    | 850               | K/Q          | NM_017940.3:c.2548A>C                       | NM_017940.3    | c.2548A>C                | NP_060410.2    | NP_060410.2:p.Lys850Gln                 |
| NBPF1-1-16902894-A>A/G                        | NBPF1    | missense_variant    | 663               | C/R          | NM_017940.3:c.1987T>C                       | NM_017940.3    | c.1987T>C                | NP_060410.2    | NP_060410.2:p.Cys663Arg                 |
| NBPF1-1-16907328-G>G/T                        | NBPF1    | synonymous_variant  | 501               | T            | NM_017940.3:c.1503C>A                       | NM_017940.3    | c.1503C>A                | NP_060410.2    | NM_017940.3:c.1503C>A(p.=)              |
| CDA-1-20940341-G>G/A                          | CDA      | missense_variant    | 91                | M/I          | NM_001785.2:c.273G>A                        | NM_001785.2    | c.273G>A                 | NP_001776.1    | NP_001776.1:p.Met91Ile                  |
| GALE-1-24122489-G>G/T                         | GALE     | missense_variant    | 333               | L/I          | NM_001127621.1:c.997C>A                     | NM_001127621.1 | c.997C>A                 | NP_001121093.1 | NP_001121093.1:p.Leu333Ile              |
| YTHDF2-1-29069334-T>T/C                       | YTHDF2   | synonymous_variant  | 184               | T            | NM_001173128.1:c.552T>C                     | NM_001173128.1 | c.552T>C                 | NP_001166599.1 | NM_001173128.1:c.552T>C(p.=)            |
| TAL1-1-47691568-GCAGA>GCAGA/G                 | TAL1     | intron_variant      | 0                 | NA           | NM_003189.2:c.-1-11_-1-8delTCTG             | NM_003189.2    | c.-1-11_-1-8delTCTG      | NP_003180.1    | NA                                      |
| RPE65-1-68904721-T>T/C                        | RPE65    | missense_variant    | 301               | N/S          | NM_000329.2:c.902A>G                        | NM_000329.2    | c.902A>G                 | NP_000320.1    | NP_000320.1:p.Asn301Ser                 |
| MSH4-1-76346920-C>CAT/CAT                     | MSH4     | intron_variant      | 0                 | NA           | NM_002440.3:c.1782-11_1782-10insAT          | NM_002440.3    | c.1782-11_1782-10insAT   | NP_002431.2    | NA                                      |
| IFI44L-1-79107305-C>C/T                       | IFI44L   | intron_variant      | 0                 | NA           | NM_006820.2:c.1324+11C>T                    | NM_006820.2    | c.1324+11C>T             | NP_006811.2    | NA                                      |
| GFI1-1-92946037-G>G/A                         | GFI1     | synonymous_variant  | 264               | F            | NM_001127216.1:c.792C>T                     | NM_001127216.1 | c.792C>T                 | NP_001120688.1 | NM_001127216.1:c.792C>T(p.=)            |
| ABCA4-1-94544135-A>AC/AC                      | ABCA4    | intron_variant      | 0                 | NA           | NM_000350.2:c.1356+10dupG                   | NM_000350.2    | c.1356+10dupG            | NP_000341.2    | NA                                      |
| NRAS-1-115256529-T>T/C                        | NRAS     | missense_variant    | 61                | Q/R          | NM_002524.4:c.182A>G                        | NM_002524.4    | c.182A>G                 | NP_002515.1    | NP_002515.1:p.Gln61Arg                  |
| NOTCH2-1-120506250-C>C/T                      | NOTCH2   | missense_variant    | 621               | R/H          | NM_024408.3:c.1862G>A                       | NM_024408.3    | c.1862G>A                | NP_077719.2    | NP_077719.2:p.Arg621His                 |
| NOTCH2-1-120539936-C>C/T                      | NOTCH2   | synonymous_variant  | 145               | T            | NM_024408.3:c.435G>A                        | NM_024408.3    | c.435G>A                 | NP_077719.2    | NM_024408.3:c.435G>A(p.=)               |
| SPRR3-1-152975763-C>C/T                       | SPRR3    | synonymous_variant  | 89                | G            | NM_005416.2:c.267C>T                        | NM_005416.2    | c.267C>T                 | NP_005407.1    | NM_005416.2:c.267C>T(p.=)               |
| LOR-1-153233990-T>T/G                         | LOR      | missense_variant    | 189               | Y/D          | NM_000427.2:c.565T>G                        | NM_000427.2    | c.565T>G                 | NP_000418.2    | NP_000418.2:p.Tyr189Asp                 |
| LOR-1-153233991-A>A/G                         | LOR      | missense_variant    | 189               | Y/C          | NM_000427.2:c.566A>G                        | NM_000427.2    | c.566A>G                 | NP_000418.2    | NP_000418.2:p.Tyr189Cys                 |
| LOR-1-153233991-A>ACTCTGGCGGCGG/ACTCTGGCGGCGG | LOR      | inframe             | 189               | G            | Y/YSGG NM_000427.2:c.566_567insCTCTGGCGGCGG | NM_000427.2    | c.566_567insCTCTGGCGGCGG | NP_000418.2    | NP_000418.2:p.Tyr189_Ser190insSerGlyGly |
| IQGAP3-1-156504449-A>A/T                      | IQGAP3   | missense_variant    | 1195              | M/K          | NM_178229.4:c.3584T>A                       | NM_178229.4    | c.3584T>A                | NP_839943.2    | NP_839943.2:p.Met1195Lys                |
| CRP-1-159683483-G>G/A                         | CRP      | synonymous_variant  | 169               | S            | NM_000567.2:c.507C>T                        | NM_000567.2    | c.507C>T                 | NP_000558.2    | NM_000567.2:c.507C>T(p.=)               |
| KCNJ9-1-160057516-A>A/G                       | KCNJ9    | missense_variant    | 364               | E/G          | NM_004983.2:c.1091A>G                       | NM_004983.2    | c.1091A>G                | NP_004974.2    | NP_004974.2:p.Glu364Gly                 |
| PEX19-1-160254899-C>C/T                       | PEX19    | missense_variant    | 6                 | E/K          | NM_002857.3:c.16G>A                         | NM_002857.3    | c.16G>A                  | NP_002848.1    | NP_002848.1:p.Glu6Lys                   |
| NR1I3-1-161200970-G>G/A                       | NR1I3    | stop_gained         | 254               | R/*          | NM_001077482.2:c.760C>T                     | NM_001077482.2 | c.760C>T                 | NP_001070950.1 | NP_001070950.1:p.Arg254Ter              |
| FCGR2A-1-161483723-G>G/A                      | FCGR2A   | splice_variant      | 0                 | NA           | NM_001136219.1:c.780+1G>A                   | NM_001136219.1 | c.780+1G>A               | NP_001129691.1 | NA                                      |
| FCGR3B-1-161599693-T>C/C                      | FCGR3B   | missense_variant    | 101               | N/S          | NM_001244753.1:c.302A>G                     | NM_001244753.1 | c.302A>G                 | NP_001231682.1 | NP_001231682.1:p.Asn101Ser              |
| FCGR3B-1-161600181-G>G/A                      | FCGR3B   | intron_variant      | 0                 | NA           | NM_001244753.1:c.149-3C>T                   | NM_001244753.1 | c.149-3C>T               | NP_001231682.1 | NA                                      |
| TMCO1-1-165694251-CTCTCTCTCTATA>C/C           | TMCO1    | 3_prime_UTR_variant | 0                 | NA           | NM_019026.4:c.*2995_*3008delTATAGAG         | NM_019026.4    | c.*2995_*3008delTATAGAG  | NP_061899.2    | NA                                      |
| F5-1-169510577-A>A/G                          | F5       | synonymous_variant  | 1251              | L            | NM_000130.4:c.3751T>C                       | NM_000130.4    | c.3751T>C                | NP_000121.2    | NM_000130.4:c.3751T>C(p.=)              |
| SELP-1-169559424-C>C/T                        | SELP     | missense_variant    | 819               | G/R          | NM_003005.3:c.2455G>A                       | NM_003005.3    | c.2455G>A                | NP_002996.2    | NP_002996.2:p.Gly819Arg                 |
| FMO6P-1-171130598-CACACA>CACACA/C             | FMO6P    | nc_exon_variant     | 0                 | NA           | NR_002601.1:n.2022_2026delACACA             | NR_002601.1    | n.2022_2026delACACA      | NA             | NA                                      |
| SERPINC1-1-173873176-C>C/A                    | SERPINC1 | missense_variant    | 416               | A/S          | NM_000488.3:c.1246G>T                       | NM_000488.3    | c.1246G>T                | NP_000479.1    | NP_000479.1:p.Ala416Ser                 |
| TROVE2-1-193045734-C>C/A                      | TROVE2   | missense_variant    | 302               | S/Y          | NM_001173524.1:c.905C>A                     | NM_001173524.1 | c.905C>A                 | NP_001166995.1 | NP_001166995.1:p.Ser302Tyr              |

|                                   |         |                     |      |       |                                    |                |                    |                |                                |
|-----------------------------------|---------|---------------------|------|-------|------------------------------------|----------------|--------------------|----------------|--------------------------------|
| PTPRC-1-198685878-G>G/A           | PTPRC   | synonymous_variant  | 453  | T     | NM_002838.4:c.1359G>A              | NM_002838.4    | c.1359G>A          | NP_002829.3    | NM_002838.4:c.1359G>A(p.=)     |
| SRGAP2-1-206516261-C>C/T          | SRGAP2  | synonymous_variant  | 22   | S     | NM_015326.2:c.65C>T                | NM_015326.2    | c.65C>T            | NP_056141.2    | NM_015326.2:c.65C>T(p.=)       |
| SRGAP2-1-206566904-T>T/C          | SRGAP2  | missense_variant    | 150  | V/A   | NM_015326.2:c.448T>C               | NM_015326.2    | c.448T>C           | NP_056141.2    | NP_056141.2:p.Val150Ala        |
| SRGAP2-1-206579936-A>A/G          | SRGAP2  | intron_variant      | 0    | NA    | NM_015326.2:c.1099+3A>G            | NM_015326.2    | c.1099+3A>G        | NP_056141.2    | NA                             |
| CR1-1-207751193-C>C/T             | CR1     | synonymous_variant  | 1527 | F     | NM_000651.4:c.4581C>T              | NM_000651.4    | c.4581C>T          | NP_000642.3    | NM_000651.4:c.4581C>T(p.=)     |
| LAMB3-1-209811256-G>G/A           | LAMB3   | synonymous_variant  | 123  | F     | NM_001127641.1:c.369C>T            | NM_001127641.1 | c.369C>T           | NP_001121113.1 | NM_001127641.1:c.369C>T(p.=)   |
| SYT14-1-210337096-CAG>CAG/C       | SYT14   | 3_prime_UTR_variant | 0    | NA    | NM_001146261.2:c.*2710_*2711delAG  | NM_001146261.2 | c.*2710_*2711delAG | NP_001139733.1 | NA                             |
| MIA3-1-222803062-A>A/G            | MIA3    | missense_variant    | 834  | I/V   | NM_198551.2:c.2500A>G              | NM_198551.2    | c.2500A>G          | NP_940953.2    | NP_940953.2:p.Ile834Val        |
| MIA3-1-222803422-G>G/A            | MIA3    | missense_variant    | 954  | E/K   | NM_198551.2:c.2860G>A              | NM_198551.2    | c.2860G>A          | NP_940953.2    | NP_940953.2:p.Glu954Lys        |
| TLR5-1-223283881-T>T/C            | TLR5    | synonymous_variant  | 831  | K     | NM_003268.5:c.2493A>G              | NM_003268.5    | c.2493A>G          | NP_003259.2    | NM_003268.5:c.2493A>G(p.=)     |
| GJC2-1-228346057-G>G/A            | GJC2    | missense_variant    | 200  | G/R   | NM_020435.3:c.598G>A               | NM_020435.3    | c.598G>A           | NP_065168.2    | NP_065168.2:p.Gly200Arg        |
| GJC2-1-228346058-G>G/A            | GJC2    | missense_variant    | 200  | G/E   | NM_020435.3:c.599G>A               | NM_020435.3    | c.599G>A           | NP_065168.2    | NP_065168.2:p.Gly200Glu        |
| OBSCN-1-228560326-C>C/A           | OBSCN   | synonymous_variant  | 7283 | R     | NM_001098623.1:c.21847C>A          | NM_001098623.1 | c.21847C>A         | NP_001092093.1 | NM_001098623.1:c.21847C>A(p.=) |
| DISC1-1-231990724-A>A/G           | DISC1   | intron_variant      | 0    | NA    | NM_001164537.1:c.2077+36461A>G     | NM_001164537.1 | c.2077+36461A>G    | NP_001158009.1 | NA                             |
| ACTN2-1-236898949-C>C/T           | ACTN2   | missense_variant    | 238  | P/S   | NM_001103.2:c.712C>T               | NM_001103.2    | c.712C>T           | NP_001094.1    | NP_001094.1:p.Pro238Ser        |
| ACTN2-1-236924311-C>C/T           | ACTN2   | intron_variant      | 0    | NA    | NM_001103.2:c.2368-4C>T            | NM_001103.2    | c.2368-4C>T        | NP_001094.1    | NA                             |
| FMN2-1-240370899-A>A/G            | FMN2    | synonymous_variant  | 929  | A     | NM_020066.4:c.2787A>G              | NM_020066.4    | c.2787A>G          | NP_064450.3    | NM_020066.4:c.2787A>G(p.=)     |
| FMN2-1-240370907-T>T/C            | FMN2    | missense_variant    | 932  | L/P   | NM_020066.4:c.2795T>C              | NM_020066.4    | c.2795T>C          | NP_064450.3    | NP_064450.3:p.Leu932Pro        |
| FMN2-1-240370908-C>C/T            | FMN2    | synonymous_variant  | 932  | L     | NM_020066.4:c.2796C>T              | NM_020066.4    | c.2796C>T          | NP_064450.3    | NM_020066.4:c.2796C>T(p.=)     |
| FMN2-1-240370913-T>T/C            | FMN2    | missense_variant    | 934  | L/P   | NM_020066.4:c.2801T>C              | NM_020066.4    | c.2801T>C          | NP_064450.3    | NP_064450.3:p.Leu934Pro        |
| FMN2-1-240371145-T>T/C            | FMN2    | synonymous_variant  | 1011 | P     | NM_020066.4:c.3033T>C              | NM_020066.4    | c.3033T>C          | NP_064450.3    | NM_020066.4:c.3033T>C(p.=)     |
| NLRP3-1-247608066-G>G/A           | NLRP3   | missense_variant    | 985  | G/E   | NM_001079821.2:c.2954G>A           | NM_001079821.2 | c.2954G>A          | NP_001073289.1 | NP_001073289.1:p.Gly985Glu     |
| MYT1L-2-1842968-T>T/A             | MYT1L   | synonymous_variant  | 1009 | G     | NM_015025.2:c.3027A>T              | NM_015025.2    | c.3027A>T          | NP_055840.2    | NM_015025.2:c.3027A>T(p.=)     |
| MYT1L-2-1946770-TTCCTCC>TTCCTCC/T | MYT1L   | inframe             | NA   | EEE/E | NM_015025.2:c.483_488delGGAGGA     | NM_015025.2    | c.483_488delGGAGGA | NP_055840.2    | NP_055840.2:p.Glu162_Glu163del |
| ODC1-2-10583672-C>C/T             | ODC1    | missense_variant    | 204  | D/N   | NM_002539.1:c.610G>A               | NM_002539.1    | c.610G>A           | NP_002530.1    | NP_002530.1:p.Asp204Asn        |
| LPIN1-2-11919638-C>C/T            | LPIN1   | intron_variant      | 0    | NA    | NM_001261428.1:c.978-7C>T          | NM_001261428.1 | c.978-7C>T         | NP_001248357.1 | NA                             |
| WDR35-2-20153619-C>C/T            | WDR35   | missense_variant    | 470  | R/Q   | NM_001006657.1:c.1409G>A           | NM_001006657.1 | c.1409G>A          | NP_001006658.1 | NP_001006658.1:p.Arg470Gln     |
| APOB-2-21260123-G>G/A             | APOB    | missense_variant    | 181  | T/I   | NM_000384.2:c.542C>T               | NM_000384.2    | c.542C>T           | NP_000375.2    | NP_000375.2:p.Thr181Ile        |
| HADHA-2-26415280-C>C/T            | HADHA   | synonymous_variant  | 633  | G     | NM_000182.4:c.1899G>A              | NM_000182.4    | c.1899G>A          | NP_000173.2    | NM_000182.4:c.1899G>A(p.=)     |
| HADHB-2-26477125-G>GACT/GACT      | HADHB   | inframe             | NA   | -/T   | NM_000183.2:c.3_4insACT            | NM_000183.2    | c.3_4insACT        | NP_000174.1    | NP_000174.1:p.Met1_Thr2insThr  |
| OTOF-2-26689571-G>G/A             | OTOF    | intron_variant      | 0    | NA    | NM_194248.2:c.4500+11C>T           | NM_194248.2    | c.4500+11C>T       | NP_919224.1    | NA                             |
| C2orf71-2-29287926-C>C/CGCT       | C2orf71 | inframe             | NA   | -/S   | NM_001029883.2:c.3673_3675dup pAGC | NM_001029883.2 | c.3673_3675dupAGC  | NP_001025054.1 | NP_001025054.1:p.Ser1225dup    |
| C2orf71-2-29293951-A>A/G          | C2orf71 | synonymous_variant  | 1059 | P     | NM_001029883.2:c.3177T>C           | NM_001029883.2 | c.3177T>C          | NP_001025054.1 | NM_001029883.2:c.3177T>C(p.=)  |
| C2orf71-2-29296447-C>C/T          | C2orf71 | synonymous_variant  | 227  | E     | NM_001029883.2:c.681G>A            | NM_001029883.2 | c.681G>A           | NP_001025054.1 | NM_001029883.2:c.681G>A(p.=)   |
| PRKD3-2-37520362-T>T/C            | PRKD3   | missense_variant    | 114  | H/R   | NM_005813.3:c.341A>G               | NM_005813.3    | c.341A>G           | NP_005804.1    | NP_005804.1:p.His114Arg        |



|                                           |          |                    |       |        |                               |                |                       |                |                                   |
|-------------------------------------------|----------|--------------------|-------|--------|-------------------------------|----------------|-----------------------|----------------|-----------------------------------|
| MSH6-2-48023195-A>A/C                     | MSH6     | missense_variant   | 207   | E/A    | NM_000179.2:c.620A>C          | NM_000179.2    | c.620A>C              | NP_000170.1    | NP_000170.1:p.Glu207Ala           |
| BCL11A-2-60688231-C>C/T                   | BCL11A   | missense_variant   | 606   | G/S    | NM_022893.3:c.1816G>A         | NM_022893.3    | c.1816G>A             | NP_075044.2    | NP_075044.2:p.Gly606Ser           |
| PUS10.PEX13-2-61244926-C>C/T              | PUS10.PE | intron_variant     | 0     | NA     | NM_144709.2:c.-16+217G>A      | NM_144709.2    | c.-16+217G>A          | NP_653310.2    | NA                                |
| CD207-2-71058929-C>C/T                    | CD207    | missense_variant   | 247   | G/R    | NM_015717.3:c.739G>A          | NM_015717.3    | c.739G>A              | NP_056532.3    | NP_056532.3:p.Gly247Arg           |
| DYSF-2-71908201-G>G/A                     | DYSF     | missense_variant   | 2045  | R/Q    | NM_001130987.1:c.6134G>A      | NM_001130987.1 | c.6134G>A             | NP_001124459.1 | NP_001124459.1:p.Arg2045Gln       |
| ALMS1-2-73675227-T>TCTC/TCTC              | ALMS1    | inframe            | 524   | S/SP   | NM_015120.4:c.1570_1571insCTC | NM_015120.4    | c.1570_1571insCTC     | NP_055935.4    | NP_055935.4:p.Ser524_Leu525insPro |
| HK2-2-75106027-C>C/T                      | HK2      | missense_variant   | 415   | S/F    | NM_000189.4:c.1244C>T         | NM_000189.4    | c.1244C>T             | NP_000180.2    | NP_000180.2:p.Ser415Phe           |
| SUCLG1-2-84668557-A>A/G                   | SUCLG1   | synonymous_variant | 115   | A      | NM_003849.3:c.345T>C          | NM_003849.3    | c.345T>C              | NP_003840.2    | NP_003849.3:c.345T>C(p.=)         |
| ADRA2B-2-96780986-C>CTCCTCCTCT/CTCCTCCTCT | ADRA2B   | inframe            | 301   | E/EEEE | NM_000682.5:c.894_902dupAGA   | NM_000682.5    | c.894_902dupAGAGGAGGA | NP_000673.2    | NP_000673.2:p.Glu298_Glu300dup    |
| SEMA4C-2-97527545-G>G/A                   | SEMA4C   | synonymous_variant | 510   | V      | NM_017789.4:c.1530C>T         | NM_017789.4    | c.1530C>T             | NP_060259.4    | NP_017789.4:c.1530C>T(p.=)        |
| RANBP2-2-109383674-T>T/C                  | RANBP2   | missense_variant   | 2227  | Y/H    | NM_006267.4:c.6679T>C         | NM_006267.4    | c.6679T>C             | NP_006258.3    | NP_006258.3:p.Tyr2227His          |
| ANAPC1-2-112536264-G>T/T                  | ANAPC1   | synonymous_variant | 1791  | I      | NM_022662.3:c.5373C>A         | NM_022662.3    | c.5373C>A             | NP_073153.1    | NM_022662.3:c.5373C>A(p.=)        |
| CNTNAP5-2-125367427-C>C/T                 | CNTNAP5  | synonymous_variant | 601   | A      | NM_130773.2:c.1803C>T         | NM_130773.2    | c.1803C>T             | NP_570129.1    | NM_130773.2:c.1803C>T(p.=)        |
| MYO7B-2-128351149-T>T/G                   | MYO7B    | missense_variant   | 725   | L/R    | NM_001080527.1:c.2174T>G      | NM_001080527.1 | c.2174T>G             | NP_001073996.1 | NP_001073996.1:p.Leu725Arg        |
| KYNU-2-143742682-T>T/C                    | KYNU     | synonymous_variant | 253   | H      | NM_003937.2:c.759T>C          | NM_003937.2    | c.759T>C              | NP_003928.1    | NP_003937.2:c.759T>C(p.=)         |
| NEB-2-152448640-T>T/C                     | NEB      | missense_variant   | 4912  | N/D    | NM_001164507.1:c.14734A>G     | NM_001164507.1 | c.14734A>G            | NP_001157979.1 | NP_001157979.1:p.Asn4912Asp       |
| NEB-2-152501045-G>G/A                     | NEB      | synonymous_variant | 2527  | Y      | NM_001164507.1:c.7581C>T      | NM_001164507.1 | c.7581C>T             | NP_001157979.1 | NM_001164507.1:c.7581C>T(p.=)     |
| KCNJ3-2-15555406-A>A/G                    | KCNJ3    | missense_variant   | 40    | K/R    | NM_002239.3:c.119A>G          | NM_002239.3    | c.119A>G              | NP_002230.1    | NP_002230.1:p.Lys40Arg            |
| SCN9A-2-167060594-A>A/G                   | SCN9A    | missense_variant   | 1538  | W/R    | NM_002977.3:c.4612T>C         | NM_002977.3    | c.4612T>C             | NP_002968.1    | NP_002968.1:p.Trp1538Arg          |
| PDE11A-2-178494173-G>GGGA/GGGA            | PDE11A   | inframe            | NA    | -/S    | NM_016953.3:c.2761_2763dupTCC | NM_016953.3    | c.2761_2763dupTCC     | NP_058649.3    | NP_058649.3:p.Ser921dup           |
| TTN-2-179566294-G>G/A                     | TTN      | missense_variant   | 10187 | P/S    | NM_001267550.1:c.30559C>T     | NM_001267550.1 | c.30559C>T            | NP_001254479.1 | NP_001254479.1:p.Pro10187Ser      |
| TTN-2-179577984-C>C/A                     | TTN      | missense_variant   | 8959  | W/C    | NM_001267550.1:c.26877G>T     | NM_001267550.1 | c.26877G>T            | NP_001254479.1 | NP_001254479.1:p.Trp8959Cys       |
| TTN-2-179587604-G>G/A                     | TTN      | missense_variant   | 7341  | S/F    | NM_001267550.1:c.22022C>T     | NM_001267550.1 | c.22022C>T            | NP_001254479.1 | NP_001254479.1:p.Ser7341Phe       |
| TTN-2-179598488-C>C/T                     | TTN      | missense_variant   | 5210  | E/K    | NM_001267550.1:c.15628G>A     | NM_001267550.1 | c.15628G>A            | NP_001254479.1 | NP_001254479.1:p.Glu5210Lys       |
| ZNF804A-2-185801756-G>G/A                 | ZNF804A  | missense_variant   | 545   | G/S    | NM_194250.1:c.1633G>A         | NM_194250.1    | c.1633G>A             | NP_919226.1    | NP_919226.1:p.Gly545Ser           |
| ZNF804A-2-185802211-C>C/CACA              | ZNF804A  | inframe            | NA    | -/T    | NM_194250.1:c.2088_2089insACA | NM_194250.1    | c.2088_2089insACA     | NP_919226.1    | NP_919226.1:p.Asn696_Thr697insThr |
| COL5A2-2-189898907-T>T/C                  | COL5A2   | synonymous_variant | 1463  | E      | NM_000393.3:c.4389A>G         | NM_000393.3    | c.4389A>G             | NP_000384.2    | NM_000393.3:c.4389A>G(p.=)        |
| ALS2-2-202582895-A>A/C                    | ALS2     | synonymous_variant | 1247  | G      | NM_020919.3:c.3741T>G         | NM_020919.3    | c.3741T>G             | NP_065970.2    | NM_020919.3:c.3741T>G(p.=)        |
| PARD3B-2-206023483-C>C/A                  | PARD3B   | intron_variant     | 0     | NA     | NM_152526.5:c.1435-13452C>A   | NM_152526.5    | c.1435-13452C>A       | NP_689739.4    | NA                                |
| NRP2-2-206605371-C>C/T                    | NRP2     | synonymous_variant | 425   | F      | NM_201266.1:c.1275C>T         | NM_201266.1    | c.1275C>T             | NP_957718.1    | NM_201266.1:c.1275C>T(p.=)        |
| NDUFS1-2-207012392-T>T/C                  | NDUFS1   | intron_variant     | 0     | NA     | NM_001199984.1:c.463-7A>G     | NM_001199984.1 | c.463-7A>G            | NP_001186913.1 | NA                                |
| IDH1-2-209106871-TG>TG/T                  | IDH1     | intron_variant     | 0     | NA     | NM_005896.2:c.699-3delC       | NM_005896.2    | c.699-3delC           | NP_005887.2    | NA                                |
| COL4A4-2-227945264-C>C/A                  | COL4A4   | synonymous_variant | 566   | G      | NM_000092.4:c.1698G>T         | NM_000092.4    | c.1698G>T             | NP_000083.3    | NM_000092.4:c.1698G>T(p.=)        |
| SLC19A3-2-228560800-GA>G/G                | SLC19A3  | intron_variant     | 0     | NA     | NM_025243.3:c.980-4delT       | NM_025243.3    | c.980-4delT           | NP_079519.1    | NA                                |

|                                |          |                    |      |        |                                     |                |                       |                |                                      |
|--------------------------------|----------|--------------------|------|--------|-------------------------------------|----------------|-----------------------|----------------|--------------------------------------|
| SP100-2-231405597-G>G/A        | SP100    | synonymous_variant | 739  | P      | NM_001080391.1:c.2217G>A            | NM_001080391.1 | c.2217G>A             | NP_001073860.1 | NM_001080391.1:c.2217G>A(p.=)        |
| GIGYF2-2-233704627-G>G/T       | GIGYF2   | synonymous_variant | 966  | S      | NM_001103147.1:c.2898G>T            | NM_001103147.1 | c.2898G>T             | NP_001096617.1 | NM_001103147.1:c.2898G>T(p.=)        |
| NEU2-2-233899077-C>C/T         | NEU2     | synonymous_variant | 151  | Y      | NM_005383.2:c.453C>T                | NM_005383.2    | c.453C>T              | NP_005374.2    | NM_005383.2:c.453C>T(p.=)            |
| COL6A3-2-238280651-G>G/A       | COL6A3   | missense_variant   | 1337 | P/S    | NM_004369.3:c.4009C>T               | NM_004369.3    | c.4009C>T             | NP_004360.2    | NP_004360.2:p.Pro1337Ser             |
| ANO7-2-242157228-G>G/T         | ANO7     | synonymous_variant | 754  | P      | NM_001001891.3:c.2262G>T            | NM_001001891.3 | c.2262G>T             | NP_001001891.2 | NM_001001891.3:c.2262G>T(p.=)        |
| CIDEC-3-9912149-G>G/T          | CIDEC    | intron_variant     | 0    | NA     | NM_001199623.1:c.247-143C>A         | NM_001199623.1 | c.247-143C>A          | NP_001186552.1 | NA                                   |
| ATP2B2-3-10413597-C>C/T        | ATP2B2   | missense_variant   | 519  | V/I    | NM_001001331.2:c.1555G>A            | NM_001001331.2 | c.1555G>A             | NP_001001331.1 | NP_001001331.1:p.Val519Ile           |
| EOMES-3-27763427-G>G/GCGGCCG   | EOMES    | inframe            | 120  | A/GAA  | NM_005442.2:c.358_359insGCG CCG     | NM_005442.2    | c.358_359insGCGCCG    | NP_005433.2    | NP_005433.2:p.Ala120_Ala120insGlyAla |
| MLH1-3-37089131-A>A/G          | MLH1     | missense_variant   | 618  | K/R    | NM_000249.3:c.1853A>G               | NM_000249.3    | c.1853A>G             | NP_000240.1    | NP_000240.1:p.Lys618Arg              |
| ABHD5-3-43743914-G>G/T         | ABHD5    | missense_variant   | 114  | R/L    | NM_016006.4:c.341G>T                | NM_016006.4    | c.341G>T              | NP_057090.2    | NP_057090.2:p.Arg114Leu              |
| CCRL2-3-46450597-G>G/A         | CCRL2    | missense_variant   | 355  | E/K    | NM_001130910.1:c.1063G>A            | NM_001130910.1 | c.1063G>A             | NP_001124382.1 | NP_001124382.1:p.Glu355Lys           |
| COL7A1-3-48618079-G>G/T        | COL7A1   | missense_variant   | 1663 | P/T    | NM_000094.3:c.4987C>A               | NM_000094.3    | c.4987C>A             | NP_000085.1    | NP_000085.1:p.Pro1663Thr             |
| SLC26A6-3-48665978-G>G/A       | SLC26A6  | intron_variant     | 0    | NA     | NM_022911.2:c.1693-4C>T             | NM_022911.2    | c.1693-4C>T           | NP_075062.2    | NA                                   |
| GPX1-3-49395673-GGCCGCC>G/GGCC | GPX1     | inframe            | NA   | AAA/AA | NM_201397.1:c.33_38delGGCG GCinsGGC | NM_201397.1    | c.33_38delGGCGCinsGGC | NP_958799.1    | NP_958799.1:p.Ala13del               |
| AMT-3-49457752-G>G/A           | AMT      | synonymous_variant | 121  | N      | NM_000481.3:c.363C>T                | NM_000481.3    | c.363C>T              | NP_000472.2    | NM_000481.3:c.363C>T(p.=)            |
| MST1R-3-49934059-G>G/A         | MST1R    | missense_variant   | 785  | H/Y    | NM_002447.2:c.2353C>T               | NM_002447.2    | c.2353C>T             | NP_002438.2    | NP_002438.2:p.His785Tyr              |
| RASSF1-3-50378090-G>G/A        | RASSF1   | synonymous_variant | 49   | G      | NM_170714.1:c.147C>T                | NM_170714.1    | c.147C>T              | NP_733832.1    | NM_170714.1:c.147C>T(p.=)            |
| DOCK3-3-51246259-C>C/G         | DOCK3    | synonymous_variant | 364  | S      | NM_004947.4:c.1092C>G               | NM_004947.4    | c.1092C>G             | NP_004938.1    | NM_004947.4:c.1092C>G(p.=)           |
| ITIH1-3-52825833-A>A/G         | ITIH1    | missense_variant   | 881  | H/R    | NM_002215.3:c.2642A>G               | NM_002215.3    | c.2642A>G             | NP_002206.2    | NP_002206.2:p.His881Arg              |
| CHDH-3-53853074-G>G/T          | CHDH     | intron_variant     | 0    | NA     | NM_018397.4:c.1264-7C>A             | NM_018397.4    | c.1264-7C>A           | NP_060867.2    | NA                                   |
| CHDH-3-53853075-A>A/T          | CHDH     | intron_variant     | 0    | NA     | NM_018397.4:c.1264-8T>A             | NM_018397.4    | c.1264-8T>A           | NP_060867.2    | NA                                   |
| ARF4-3-57563120-GA>GA/G        | ARF4     | intron_variant     | 0    | NA     | NM_001660.3:c.259-7delT             | NM_001660.3    | c.259-7delT           | NP_001651.1    | NA                                   |
| DNASE1L3-3-58196522-C>C/G      | DNASE1L3 | missense_variant   | 38   | D/H    | NM_004944.3:c.112G>C                | NM_004944.3    | c.112G>C              | NP_004935.1    | NP_004935.1:p.Asp38His               |
| MITF-3-69928279-C>C/T          | MITF     | intron_variant     | 0    | NA     | NM_198159.2:c.105-6C>T              | NM_198159.2    | c.105-6C>T            | NP_937802.1    | NA                                   |
| MYH15-3-108102586-T>A/A        | MYH15    | intron_variant     | 0    | NA     | NM_014981.1:c.5692-10A>T            | NM_014981.1    | c.5692-10A>T          | NP_055796.1    | NA                                   |
| CD96-3-111298000-G>G/A         | CD96     | missense_variant   | 240  | D/N    | NM_198196.2:c.718G>A                | NM_198196.2    | c.718G>A              | NP_937839.1    | NP_937839.1:p.Asp240Asn              |
| ARHGAP31-3-119102053-C>C/T     | ARHGAP31 | missense_variant   | 221  | P/L    | NM_020754.2:c.662C>T                | NM_020754.2    | c.662C>T              | NP_065805.2    | NP_065805.2:p.Pro221Leu              |
| ILDR1-3-121724098-G>G/A        | ILDR1    | synonymous_variant | 124  | I      | NM_001199799.1:c.372C>T             | NM_001199799.1 | c.372C>T              | NP_001186728.1 | NM_001199799.1:c.372C>T(p.=)         |
| MUC13-3-124646705-A>AAAG/AAAG  | MUC13    | inframe            | 62   | F/SF   | NM_033049.3:c.182_184dupCTT         | NM_033049.3    | c.182_184dupCTT       | NP_149038.3    | NP_149038.3:p.Phe62_Pro62insSer      |
| COL6A4P2-3-129982997-CT>CT/C   | COL6A4P2 | nc_exon_variant    | 0    | NA     | NR_027898.1:n.1942delT              | NR_027898.1    | n.1942delT            | NA             | NA                                   |
| COL6A5-3-130095464-A>A/C       | COL6A5   | missense_variant   | 151  | E/A    | NM_153264.5:c.452A>C                | NM_153264.5    | c.452A>C              | NP_694996.5    | NP_694996.5:p.Glu151Ala              |
| TOPBP1-3-133320222-C>C/T       | TOPBP1   | missense_variant   | 1481 | V/I    | NM_007027.3:c.4441G>A               | NM_007027.3    | c.4441G>A             | NP_008958.2    | NP_008958.2:p.Val1481Ile             |
| ATR-3-142274770-T>T/C          | ATR      | missense_variant   | 764  | K/E    | NM_001184.3:c.2290A>G               | NM_001184.3    | c.2290A>G             | NP_001175.2    | NP_001175.2:p.Lys764Glu              |
| SI-3-164733763-C>C/T           | SI       | missense_variant   | 1289 | G/R    | NM_001041.3:c.3865G>A               | NM_001041.3    | c.3865G>A             | NP_001032.2    | NP_001032.2:p.Gly1289Arg             |
| SI-3-164792451-A>A/G           | SI       | synonymous_variant | 41   | I      | NM_001041.3:c.123T>C                | NM_001041.3    | c.123T>C              | NP_001032.2    | NP_001041.3:c.123T>C(p.=)            |
| SERPINI2-3-167167141-C>C/T     | SERPINI2 | synonymous_variant | 338  | E      | NM_006217.3:c.1014G>A               | NM_006217.3    | c.1014G>A             | NP_006208.1    | NM_006217.3:c.1014G>A(p.=)           |
| EIF4G1-3-184045777-C>C/T       | EIF4G1   | stop_gained        | 1321 | Q/*    | NM_001194947.1:c.3961C>T            | NM_001194947.1 | c.3961C>T             | NP_001181876.1 | NP_001181876.1:p.Gln1321Ter          |
| TM4SF19-3-196050620-C>C/T      | TM4SF19  | missense_variant   | 232  | E/K    | NM_001204897.1:c.694G>A             | NM_001204897.1 | c.694G>A              | NP_001191826.1 | NP_001191826.1:p.Glu232Lys           |
| HTT-4-3208217-C>C/T            | HTT      | intron_variant     | 0    | NA     | NM_002111.6:c.5719-6C>T             | NM_002111.6    | c.5719-6C>T           | NP_002102.4    | NA                                   |
| LRPAP1-4-3519881-C>C/T         | LRPAP1   | missense_variant   | 211  | D/N    | NM_002337.3:c.631G>A                | NM_002337.3    | c.631G>A              | NP_002328.1    | NP_002328.1:p.Asp211Asn              |

|                            |         |                    |      |      |                              |                |                   |                |                                   |
|----------------------------|---------|--------------------|------|------|------------------------------|----------------|-------------------|----------------|-----------------------------------|
| SLC34A2-4-25677884-C>C/T   | SLC34A2 | missense_variant   | 529  | A/V  | NM_006424.2:c.1586C>T        | NM_006424.2    | c.1586C>T         | NP_006415.2    | NP_006415.2:p.Ala529Val           |
| SLC34A2-4-25677885-C>C/T   | SLC34A2 | synonymous_variant | 529  | A    | NM_006424.2:c.1587C>T        | NM_006424.2    | c.1587C>T         | NP_006415.2    | NM_006424.2:c.1587C>T(p.=)        |
| UGT2B7-4-69962700-T>T/C    | UGT2B7  | synonymous_variant | 154  | F    | NM_001074.2:c.462T>C         | NM_001074.2    | c.462T>C          | NP_001065.2    | NM_001074.2:c.462T>C(p.=)         |
| MUC7-4-71347185-T>T/C      | MUC7    | missense_variant   | 242  | S/P  | NM_001145006.1:c.724T>C      | NM_001145006.1 | c.724T>C          | NP_001138478.1 | NP_001138478.1:p.Ser242Pro        |
| MUC7-4-71347207-T>T/C      | MUC7    | missense_variant   | 249  | L/P  | NM_001145006.1:c.746T>C      | NM_001145006.1 | c.746T>C          | NP_001138478.1 | NP_001138478.1:p.Leu249Pro        |
| PTPN13-4-87692632-T>T/A    | PTPN13  | synonymous_variant | 1709 | I    | NM_080685.2:c.5127T>A        | NM_080685.2    | c.5127T>A         | NP_542416.1    | NM_080685.2:c.5127T>A(p.=)        |
| PTPN13-4-87692633-T>T/C    | PTPN13  | missense_variant   | 1710 | C/R  | NM_080685.2:c.5128T>C        | NM_080685.2    | c.5128T>C         | NP_542416.1    | NP_542416.1:p.Cys1710Arg          |
| RRH-4-110763764-C>C/T      | RRH     | missense_variant   | 287  | T/I  | NM_006583.2:c.860C>T         | NM_006583.2    | c.860C>T          | NP_006574.1    | NP_006574.1:p.Thr287Ile           |
| MGST2-4-140616417-C>C/T    | MGST2   | synonymous_variant | 75   | N    | NM_002413.4:c.225C>T         | NM_002413.4    | c.225C>T          | NP_002404.1    | NM_002413.4:c.225C>T(p.=)         |
| GYP A-4-145041720-A>G/G    | GYP A   | missense_variant   | 20   | L/S  | NM_002099.6:c.59T>C          | NM_002099.6    | c.59T>C           | NP_002090.4    | NP_002090.4:p.Leu20Ser            |
| FGG-4-155533035-G>G/C      | FGG     | missense_variant   | 108  | A/G  | NM_021870.2:c.323C>G         | NM_021870.2    | c.323C>G          | NP_068656.2    | NP_068656.2:p.Ala108Gly           |
| FRG1-4-190876196-G>G/A     | FRG1    | missense_variant   | 108  | A/T  | NM_004477.2:c.322G>A         | NM_004477.2    | c.322G>A          | NP_004468.1    | NP_004468.1:p.Ala108Thr           |
| FRG1-4-190876204-G>G/A     | FRG1    | synonymous_variant | 110  | K    | NM_004477.2:c.330G>A         | NM_004477.2    | c.330G>A          | NP_004468.1    | NM_004477.2:c.330G>A(p.=)         |
| FRG1-4-190876242-G>G/A     | FRG1    | missense_variant   | 123  | G/E  | NM_004477.2:c.368G>A         | NM_004477.2    | c.368G>A          | NP_004468.1    | NP_004468.1:p.Gly123Glu           |
| FRG1-4-190876257-G>G/A     | FRG1    | missense_variant   | 128  | R/H  | NM_004477.2:c.383G>A         | NM_004477.2    | c.383G>A          | NP_004468.1    | NP_004468.1:p.Arg128His           |
| FRG1-4-190882973-A>A/G     | FRG1    | intron_variant     | 0    | NA   | NM_004477.2:c.630-4A>G       | NM_004477.2    | c.630-4A>G        | NP_004468.1    | NA                                |
| FRG1-4-190883026-G>G/T     | FRG1    | missense_variant   | 227  | D/Y  | NM_004477.2:c.679G>T         | NM_004477.2    | c.679G>T          | NP_004468.1    | NP_004468.1:p.Asp227Tyr           |
| FRG1-4-190883051-G>G/A     | FRG1    | missense_variant   | 235  | R/Q  | NM_004477.2:c.704G>A         | NM_004477.2    | c.704G>A          | NP_004468.1    | NP_004468.1:p.Leu235Gln           |
| SLC6A18-5-1235627-C>C/T    | SLC6A18 | synonymous_variant | 157  | A    | NM_182632.2:c.471C>T         | NM_182632.2    | c.471C>T          | NP_872438.2    | NM_182632.2:c.471C>T(p.=)         |
| DNAH5-5-13776635-G>G/A     | DNAH5   | stop_gained        | 3096 | R/*  | NM_001369.2:c.9286C>T        | NM_001369.2    | c.9286C>T         | NP_001360.1    | NP_001360.1:p.Arg3096Ter          |
| DNAH5-5-13777417-C>C/T     | DNAH5   | missense_variant   | 3000 | R/Q  | NM_001369.2:c.8999G>A        | NM_001369.2    | c.8999G>A         | NP_001360.1    | NP_001360.1:p.Arg3000Gln          |
| PRDM9-5-2352765-A>A/C      | PRDM9   | missense_variant   | 790  | N/H  | NM_020227.2:c.2368A>C        | NM_020227.2    | c.2368A>C         | NP_064612.2    | NP_064612.2:p.Asn790His           |
| NIPBL-5-37019434-A>A/G     | NIPBL   | missense_variant   | 1648 | I/V  | NM_133433.3:c.4942A>G        | NM_133433.3    | c.4942A>G         | NP_597677.2    | NP_597677.2:p.Ile1648Val          |
| LIFR-5-38481813-G>G/A      | LIFR    | missense_variant   | 1060 | P/S  | NM_001127671.1:c.3178C>T     | NM_001127671.1 | c.3178C>T         | NP_001121143.1 | NP_001121143.1:p.Pro1060Ser       |
| LIFR-5-38485971-T>T/C      | LIFR    | missense_variant   | 816  | D/G  | NM_001127671.1:c.2447A>G     | NM_001127671.1 | c.2447A>G         | NP_001121143.1 | NP_001121143.1:p.Asp816Gly        |
| MAP3K1-5-56177848-TCAA>T/T | MAP3K1  | inframe            | NA   | ST/S | NM_005921.1:c.2822_2824delCA | NM_005921.1    | c.2822_2824delCAA | NP_005912.1    | NP_005912.1:p.Thr942del           |
| CDK7-5-68550423-A>A/G      | CDK7    | intron_variant     | 0    | NA   | NM_001799.3:c.161-6A>G       | NM_001799.3    | c.161-6A>G        | NP_001790.1    | NA                                |
| MCCC2-5-70952652-A>A/G     | MCCC2   | missense_variant   | 553  | I/V  | NM_022132.4:c.1657A>G        | NM_022132.4    | c.1657A>G         | NP_071415.1    | NP_071415.1:p.Ile553Val           |
| AP3B1-5-77335015-G>G/T     | AP3B1   | missense_variant   | 887  | F/L  | NM_003664.3:c.2661C>A        | NM_003664.3    | c.2661C>A         | NP_003655.3    | NP_003655.3:p.Phe887Leu           |
| WDR36-5-110434448-C>C/T    | WDR36   | missense_variant   | 163  | A/V  | NM_139281.2:c.488C>T         | NM_139281.2    | c.488C>T          | NP_644810.1    | NP_644810.1:p.Ala163Val           |
| SPINK5-5-147505328-C>C/A   | SPINK5  | missense_variant   | 958  | L/I  | NM_001127698.1:c.2872C>A     | NM_001127698.1 | c.2872C>A         | NP_001121170.1 | NP_001121170.1:p.Leu958Ile        |
| SH3TC2-5-148417937-A>A/G   | SH3TC2  | missense_variant   | 308  | F/L  | NM_024577.3:c.922T>C         | NM_024577.3    | c.922T>C          | NP_078853.2    | NP_078853.2:p.Phe308Leu           |
| ADAM19-5-156945833-C>C/G   | ADAM19  | missense_variant   | 222  | E/Q  | NM_033274.3:c.664G>C         | NM_033274.3    | c.664G>C          | NP_150377.1    | NP_150377.1:p.Glu222Gln           |
| ADAM19-5-156991445-G>G/A   | ADAM19  | missense_variant   | 63   | L/F  | NM_033274.3:c.187C>T         | NM_033274.3    | c.187C>T          | NP_150377.1    | NP_150377.1:p.Leu63Phe            |
| WWC1-5-167850877-C>C/T     | WWC1    | synonymous_variant | 538  | S    | NM_001161661.1:c.1614C>T     | NM_001161661.1 | c.1614C>T         | NP_001155133.1 | NM_001161661.1:c.1614C>T(p.=)     |
| GRM6-5-178413725-G>G/A     | GRM6    | synonymous_variant | 510  | P    | NM_000843.3:c.1530C>T        | NM_000843.3    | c.1530C>T         | NP_000834.2    | NM_000843.3:c.1530C>T(p.=)        |
| GRM6-5-178418906-C>C/T     | GRM6    | missense_variant   | 228  | S/N  | NM_000843.3:c.683G>A         | NM_000843.3    | c.683G>A          | NP_000834.2    | NP_000834.2:p.Ser228Asn           |
| ADAMTS2-5-178581083-C>C/T  | ADAMTS2 | missense_variant   | 450  | R/H  | NM_014244.4:c.1349G>A        | NM_014244.4    | c.1349G>A         | NP_055059.2    | NP_055059.2:p.Arg450His           |
| FOXC1-6-1612017-A>A/ACGG   | FOXC1   | inframe            | 446  | H/HG | NM_001453.2:c.1337_1338insCG | NM_001453.2    | c.1337_1338insCGG | NP_001444.2    | NP_001444.2:p.His446_Gly447insGly |
| HLA-A-6-29910716-C>C/G     | HLA-A   | missense_variant   | 86   | Q/E  | NM_002116.7:c.256C>G         | NM_002116.7    | c.256C>G          | NP_002107.3    | NP_002107.3:p.Gln86Glu            |
| HLA-A-6-29910717-A>A/G     | HLA-A   | missense_variant   | 86   | Q/R  | NM_002116.7:c.257A>G         | NM_002116.7    | c.257A>G          | NP_002107.3    | NP_002107.3:p.Gln86Arg            |
| HLA-A-6-29911893-C>C/T     | HLA-A   | intron_variant     | 0    | NA   | NM_002116.7:c.620-6C>T       | NM_002116.7    | c.620-6C>T        | NP_002107.3    | NA                                |
| HLA-A-6-29912108-G>G/C     | HLA-A   | missense_variant   | 277  | E/Q  | NM_002116.7:c.829G>C         | NM_002116.7    | c.829G>C          | NP_002107.3    | NP_002107.3:p.Glu277Gln           |
| HLA-A-6-29912856-A>A/T     | HLA-A   | missense_variant   | 345  | T/S  | NM_002116.7:c.1033A>T        | NM_002116.7    | c.1033A>T         | NP_002107.3    | NP_002107.3:p.Thr345Ser           |

|                               |          |                     |      |     |                                 |                |                    |                |                                   |
|-------------------------------|----------|---------------------|------|-----|---------------------------------|----------------|--------------------|----------------|-----------------------------------|
| CCHCR1-6-31113276-G>G/A       | CCHCR1   | intron_variant      | 0    | NA  | NM_001105564.1:c.1694-6C>T      | NM_001105564.1 | c.1694-6C>T        | NP_001099034.1 | NA                                |
| HLA-C-6-31237769-G>G/A        | HLA-C    | missense_variant    | 330  | A/V | NM_002117.5:c.989C>T            | NM_002117.5    | c.989C>T           | NP_002108.4    | NP_002108.4:p.Ala330Val           |
| HLA-C-6-31237774-G>G/C        | HLA-C    | synonymous_variant  | 328  | V   | NM_002117.5:c.984C>G            | NM_002117.5    | c.984C>G           | NP_002108.4    | NP_002117.5:c.984C>G(p.=)         |
| MICA-6-31379817-T>C/C         | MICA     | missense_variant    | 236  | I/T | NM_001177519.1:c.707T>C         | NM_001177519.1 | c.707T>C           | NP_001170990.1 | NP_001170990.1:p.Ile236Thr        |
| MICA-6-31379931-G>A/A         | MICA     | missense_variant    | 274  | R/Q | NM_001177519.1:c.821G>A         | NM_001177519.1 | c.821G>A           | NP_001170990.1 | NP_001170990.1:p.Arg274Gln        |
| MICA-6-31380157-TGCTG>TGCTG/T | MICA     | frameshift_variant  | NA   | NA  | NM_001177519.1:c.949_952delGCTG | NM_001177519.1 | c.949_952delGCTG   | NP_001170990.1 | NP_001170990.1:p.Gly318AlafsTer67 |
| MICA-6-31380161-G>G/GCT       | MICA     | frameshift_variant  | 318  | NA  | NM_001177519.1:c.952_953insCT   | NM_001177519.1 | c.952_953insCT     | NP_001170990.1 | NP_001170990.1:p.Gly318AlafsTer69 |
| NCR3-6-31556992-G>G/C         | NCR3     | intron_variant      | 0    | NA  | NM_147130.2:c.497-39C>G         | NM_147130.2    | c.497-39C>G        | NP_667341.1    | NA                                |
| HSPA1L-6-31778948-C>C/T       | HSPA1L   | missense_variant    | 268  | A/T | NM_005527.3:c.802G>A            | NM_005527.3    | c.802G>A           | NP_005518.3    | NP_005518.3:p.Ala268Thr           |
| TNXA-6-31977552-C>C/G         | TNXA     | nc_exon_variant     | 0    | NA  | NR_001284.2:n.2010G>C           | NR_001284.2    | n.2010G>C          | NA             | NA                                |
| CYP21A2-6-32006867-G>G/A      | CYP21A2  | intron_variant      | 0    | NA  | NM_000500.7:c.293-4G>A          | NM_000500.7    | c.293-4G>A         | NP_000491.4    | NA                                |
| CYP21A2-6-32008451-C>C/T      | CYP21A2  | synonymous_variant  | 375  | S   | NM_000500.7:c.1125C>T           | NM_000500.7    | c.1125C>T          | NP_000491.4    | NM_000500.7:c.1125C>T(p.=)        |
| HLA-DRB5-6-32489671-A>G/G     | HLA-DRB5 | intron_variant      | 0    | NA  | NM_002125.3:c.370+11T>C         | NM_002125.3    | c.370+11T>C        | NP_002116.2    | NA                                |
| HLA-DRB5-6-32489672-C>C/A     | HLA-DRB5 | intron_variant      | 0    | NA  | NM_002125.3:c.370+10G>T         | NM_002125.3    | c.370+10G>T        | NP_002116.2    | NA                                |
| HLA-DRB5-6-32489674-A>A/G     | HLA-DRB5 | intron_variant      | 0    | NA  | NM_002125.3:c.370+8T>C          | NM_002125.3    | c.370+8T>C         | NP_002116.2    | NA                                |
| HLA-DRB5-6-32489675-T>T/C     | HLA-DRB5 | intron_variant      | 0    | NA  | NM_002125.3:c.370+7A>G          | NM_002125.3    | c.370+7A>G         | NP_002116.2    | NA                                |
| HLA-DRB5-6-32489766-A>A/T     | HLA-DRB5 | missense_variant    | 96   | F/I | NM_002125.3:c.286T>A            | NM_002125.3    | c.286T>A           | NP_002116.2    | NP_002116.2:p.Phe96Ile            |
| HLA-DRB5-6-32489791-A>G/C     | HLA-DRB5 | synonymous_variant  | 87   | A   | NM_002125.3:c.261T>G            | NM_002125.3    | c.261T>G           | NP_002116.2    | NM_002125.3:c.261T>G(p.=)         |
| HLA-DRB5-6-32489792-G>G/T     | HLA-DRB5 | missense_variant    | 87   | A/D | NM_002125.3:c.260C>A            | NM_002125.3    | c.260C>A           | NP_002116.2    | NP_002116.2:p.Ala87Asp            |
| HLA-DRB5-6-32489795-T>T/C     | HLA-DRB5 | missense_variant    | 86   | D/G | NM_002125.3:c.257A>G            | NM_002125.3    | c.257A>G           | NP_002116.2    | NP_002116.2:p.Asp86Gly            |
| HLA-DRB5-6-32489796-C>C/T     | HLA-DRB5 | missense_variant    | 86   | D/N | NM_002125.3:c.256G>A            | NM_002125.3    | c.256G>A           | NP_002116.2    | NP_002116.2:p.Asp86Asn            |
| HLA-DRB1-6-32548026-G>G/C     | HLA-DRB1 | missense_variant    | 262  | T/R | NM_002124.3:c.785C>G            | NM_002124.3    | c.785C>G           | NP_002115.2    | NP_002115.2:p.Thr262Arg           |
| HLA-DRB1-6-32552059-G>T/A     | HLA-DRB1 | missense_variant    | 66   | S/F | NM_002124.3:c.197C>T            | NM_002124.3    | c.197C>T           | NP_002115.2    | NP_002115.2:p.Ser66Phe            |
| HLA-DQB1-6-32632781-A>T/T     | HLA-DQB1 | missense_variant    | 58   | L/H | NM_001243961.1:c.173T>A         | NM_001243961.1 | c.173T>A           | NP_001230890.1 | NP_001230890.1:p.Leu58His         |
| HLA-DPB1-6-33048689-G>A/A     | HLA-DPB1 | missense_variant    | 114  | G/E | NM_002121.5:c.341G>A            | NM_002121.5    | c.341G>A           | NP_002112.3    | NP_002112.3:p.Gly114Glu           |
| HLA-DPB1-6-33048691-C>G/G     | HLA-DPB1 | missense_variant    | 115  | P/A | NM_002121.5:c.343C>G            | NM_002121.5    | c.343C>G           | NP_002112.3    | NP_002112.3:p.Pro115Ala           |
| HLA-DPB1-6-33052717-A>C/C     | HLA-DPB1 | intron_variant      | 0    | NA  | NM_002121.5:c.365-10A>C         | NM_002121.5    | c.365-10A>C        | NP_002112.3    | NA                                |
| HLA-DPB1-6-33052719-G>A/A     | HLA-DPB1 | intron_variant      | 0    | NA  | NM_002121.5:c.365-8G>A          | NM_002121.5    | c.365-8G>A         | NP_002112.3    | NA                                |
| HLA-DPB1-6-33052723-C>G/G     | HLA-DPB1 | intron_variant      | 0    | NA  | NM_002121.5:c.365-4C>G          | NM_002121.5    | c.365-4C>G         | NP_002112.3    | NA                                |
| HLA-DPB1-6-33052736-G>A/A     | HLA-DPB1 | missense_variant    | 125  | R/K | NM_002121.5:c.374G>A            | NM_002121.5    | c.374G>A           | NP_002112.3    | NP_002112.3:p.Arg125Lys           |
| HLA-DPB1-6-33052743-T>C/C     | HLA-DPB1 | synonymous_variant  | 127  | N   | NM_002121.5:c.381T>C            | NM_002121.5    | c.381T>C           | NP_002112.3    | NM_002121.5:c.381T>C(p.=)         |
| PNPLA1-6-36238293-G>G/A       | PNPLA1   | synonymous_variant  | 19   | S   | NM_001145717.1:c.57G>A          | NM_001145717.1 | c.57G>A            | NP_001139189.2 | NM_001145717.1:c.57G>A(p.=)       |
| PNPLA1-6-36275394-G>G/A       | PNPLA1   | synonymous_variant  | 500  | V   | NM_001145717.1:c.1500G>A        | NM_001145717.1 | c.1500G>A          | NP_001139189.2 | NM_001145717.1:c.1500G>A(p.=)     |
| TRERF1-6-42200562-C>C/T       | TRERF1   | synonymous_variant  | 1045 | K   | NM_033502.2:c.3135G>A           | NM_033502.2    | c.3135G>A          | NP_277037.1    | NM_033502.2:c.3135G>A(p.=)        |
| PRPH2-6-42689824-G>G/A        | PRPH2    | synonymous_variant  | 83   | Y   | NM_000322.4:c.249C>T            | NM_000322.4    | c.249C>T           | NP_000313.2    | NM_000322.4:c.249C>T(p.=)         |
| CUL7-6-43018819-G>G/A         | CUL7     | missense_variant    | 458  | R/W | NM_001168370.1:c.1372C>T        | NM_001168370.1 | c.1372C>T          | NP_001161842.1 | NP_001161842.1:p.Arg458Trp        |
| IL17F-6-52101743-G>G/A        | IL17F    | missense_variant    | 160  | H/Y | NM_052872.3:c.478C>T            | NM_052872.3    | c.478C>T           | NP_443104.1    | NP_443104.1:p.His160Tyr           |
| EFHC1-6-52358887-T>T/TCA      | EFHC1    | 3_prime_UTR_variant | 0    | NA  | NM_018100.3:c.*1748_*1749insCA  | NM_018100.3    | c.*1748_*1749insCA | NP_060570.2    | NA                                |
| MYO6-6-76624538-G>G/A         | MYO6     | missense_variant    | 1223 | D/N | NM_004999.3:c.3667G>A           | NM_004999.3    | c.3667G>A          | NP_004990.3    | NP_004990.3:p.Asp1223Asn          |
| BCKDHB-6-80837253-G>G/T       | BCKDHB   | intron_variant      | 0    | NA  | NM_000056.3:c.197-11G>T         | NM_000056.3    | c.197-11G>T        | NP_000047.1    | NA                                |
| TSPYL1-6-116600465-T>T/TCAC   | TSPYL1   | inframe             | NA   | -/V | NM_003309.3:c.526_528dupGTG     | NM_003309.3    | c.526_528dupGTG    | NP_003300.1    | NP_003300.1:p.Val176dup           |
| MYB-6-135516912-C>C/T         | MYB      | synonymous_variant  | 325  | P   | NM_001130173.1:c.975C>T         | NM_001130173.1 | c.975C>T           | NP_001123645.1 | NM_001130173.1:c.975C>T(p.=)      |

|                                         |           |                     |      |     |                                  |                |                         |                |                              |
|-----------------------------------------|-----------|---------------------|------|-----|----------------------------------|----------------|-------------------------|----------------|------------------------------|
| TNFAIP3-6-138199814-G>G/A               | TNFAIP3   | missense_variant    | 411  | R/Q | NM_006290.3:c.1232G>A            | NM_006290.3    | c.1232G>A               | NP_006281.1    | NP_006281.1:p.Arg411Gln      |
| TNFAIP3-6-138199898-G>G/C               | TNFAIP3   | missense_variant    | 439  | R/P | NM_006290.3:c.1316G>C            | NM_006290.3    | c.1316G>C               | NP_006281.1    | NP_006281.1:p.Arg439Pro      |
| SYNE1-6-152697675-G>G/T                 | SYNE1     | synonymous_variant  | 3055 | S   | NM_182961.3:c.9165C>A            | NM_182961.3    | c.9165C>A               | NP_892006.3    | NM_182961.3:c.9165C>A(p.=)   |
| PLG-6-161152905-C>C/T                   | PLG       | missense_variant    | 523  | R/W | NM_000301.3:c.1567C>T            | NM_000301.3    | c.1567C>T               | NP_000292.1    | NP_000292.1:p.Arg523Trp      |
| PMS2-7-6036969-T>T/C                    | PMS2      | missense_variant    | 264  | H/R | NM_000535.5:c.791A>G             | NM_000535.5    | c.791A>G                | NP_000526.1    | NP_000526.1:p.His264Arg      |
| BMPER-7-33945364-G>G/A                  | BMPER     | intron_variant      | 0    | NA  | NM_133468.4:c.133+6G>A           | NM_133468.4    | c.133+6G>A              | NP_597725.1    | NA                           |
| NPSR1-AS1.NPSR1-7-34818119-G>G/A        | AS1.NPSR1 | missense_variant    | 109  | R/Q | NM_207173.1:c.326G>A             | NM_207173.1    | c.326G>A                | NP_997056.1    | NP_997056.1:p.Arg109Gln      |
| PGAM2-7-44104754-C>C/T                  | PGAM2     | synonymous_variant  | 125  | P   | NM_000290.3:c.375G>A             | NM_000290.3    | c.375G>A                | NP_000281.2    | NM_000290.3:c.375G>A(p.=)    |
| ZPBP-7-50121384-C>C/T                   | ZPBP      | missense_variant    | 107  | G/E | NM_007009.2:c.320G>A             | NM_007009.2    | c.320G>A                | NP_008940.2    | NP_008940.2:p.Gly107Glu      |
| NCF1-7-74193668-G>A/A                   | NCF1      | missense_variant    | 99   | G/S | NM_000265.4:c.295G>A             | NM_000265.4    | c.295G>A                | NP_000256.3    | NP_000256.3:p.Gly99Ser       |
| GTF2IRD2-7-74212036-C>C/G               | GTF2IRD2  | missense_variant    | 605  | K/N | NM_173537.2:c.1815G>C            | NM_173537.2    | c.1815G>C               | NP_775808.2    | NP_775808.2:p.Lys605Asn      |
| GTF2IRD2-7-74212351-C>C/T               | GTF2IRD2  | synonymous_variant  | 500  | L   | NM_173537.2:c.1500G>A            | NM_173537.2    | c.1500G>A               | NP_775808.2    | NM_173537.2:c.1500G>A(p.=)   |
| GTF2IRD2-7-74212352-A>A/G               | GTF2IRD2  | missense_variant    | 500  | L/S | NM_173537.2:c.1499T>C            | NM_173537.2    | c.1499T>C               | NP_775808.2    | NP_775808.2:p.Leu500Ser      |
| PMS2P3-7-75145411-T>C/C                 | PMS2P3    | intron_variant      | 0    | NA  | NR_028059.1:n.745+9A>G           | NR_028059.1    | n.745+9A>G              | NA             | NA                           |
| PMS2P3-7-75157166-CCTTCGCCTCCGCCGCCA>CC |           |                     |      |     | NR_028059.1:n.271_287delITGG     |                | n.271_287delITGGCGCGCGG |                |                              |
| TTCCGCTCCGCCGCCA/C                      | PMS2P3    | nc_exon_variant     | 0    | NA  | CGCGGAGGCGAAG                    | NR_028059.1    | AGGCGAAG                | NA             | NA                           |
| GRM3-7-86394940-C>C/G                   | GRM3      | intron_variant      | 0    | NA  | NM_000840.2:c.468+11C>G          | NM_000840.2    | c.468+11C>G             | NP_000831.2    | NA                           |
| DLX5-7-96650226-C>C/T                   | DLX5      | missense_variant    | 231  | R/H | NM_005221.5:c.692G>A             | NM_005221.5    | c.692G>A                | NP_005212.1    | NP_005212.1:p.Arg231His      |
| AP4M1-7-99700378-C>C/T                  | AP4M1     | synonymous_variant  | 76   | P   | NM_004722.3:c.228C>T             | NM_004722.3    | c.228C>T                | NP_004713.2    | NM_004722.3:c.228C>T(p.=)    |
| ZAN-7-100371473-C>C/T                   | ZAN       | missense_variant    | 1922 | R/C | NM_003386.1:c.5764C>T            | NM_003386.1    | c.5764C>T               | NP_003377.1    | NP_003377.1:p.Arg1922Cys     |
| ZAN-7-100371474-G>G/A                   | ZAN       | missense_variant    | 1922 | R/H | NM_003386.1:c.5765G>A            | NM_003386.1    | c.5765G>A               | NP_003377.1    | NP_003377.1:p.Arg1922His     |
| MUC3A-7-100610069-C>C/T                 | MUC3A     | missense_variant    | 1462 | H/Y | XM_001725354.4:c.4384C>T         | XM_001725354.4 | c.4384C>T               | XP_001725406.2 | XP_001725406.2:p.His1462Tyr  |
| LAMB1-7-107564539-G>A/A                 | LAMB1     | intron_variant      | 0    | NA  | NM_002291.2:c.5225-7C>T          | NM_002291.2    | c.5225-7C>T             | NP_002282.2    | NA                           |
| LAMB1-7-107564542-G>T/T                 | LAMB1     | intron_variant      | 0    | NA  | NM_002291.2:c.5225-10C>A         | NM_002291.2    | c.5225-10C>A            | NP_002282.2    | NA                           |
| FOXP2-7-114331998-G>G/A                 | FOXP2     | 3_prime_UTR_variant | 0    | NA  | NM_148898.3:c.*2017G>A           | NM_148898.3    | c.*2017G>A              | NP_683696.2    | NA                           |
| CEP41-7-130036343-C>C/T                 | CEP41     | 3_prime_UTR_variant | 0    | NA  | NM_018718.2:c.*2389G>A           | NM_018718.2    | c.*2389G>A              | NP_061188.1    | NA                           |
| CEP41-7-130038583-A>A/G                 | CEP41     | 3_prime_UTR_variant | 0    | NA  | NM_018718.2:c.*149T>C            | NM_018718.2    | c.*149T>C               | NP_061188.1    | NA                           |
| CEP41-7-130080985-G>A/T                 | CEP41     | 5_prime_UTR_variant | 0    | NA  | NM_018718.2:c.-178C>A            | NM_018718.2    | c.-178C>A               | NP_061188.1    | NA                           |
| CHRM2-7-136700569-C>C/T                 | CHRM2     | synonymous_variant  | 319  | N   | NM_001006627.1:c.957C>T          | NM_001006627.1 | c.957C>T                | NP_001006628.1 | NM_001006627.1:c.957C>T(p.=) |
| PRSS1-7-142460313-T>T/C                 | PRSS1     | synonymous_variant  | 162  | D   | NM_002769.4:c.486T>C             | NM_002769.4    | c.486T>C                | NP_002760.1    | NM_002769.4:c.486T>C(p.=)    |
| KEL-7-142658471-A>A/G                   | KEL       | missense_variant    | 67   | Y/H | NM_000420.2:c.199T>C             | NM_000420.2    | c.199T>C                | NP_000411.1    | NP_000411.1:p.Tyr67His       |
| CNTNAP2-7-148106477-C>C/CTG             | CNTNAP2   | intron_variant      | 0    | NA  | NM_014141.5:c.3716-6_3716-5insTG | NM_014141.5    | c.3716-6_3716-5insTG    | NP_054860.1    | NA                           |
| KMT2C-7-151932908-T>T/C                 | KMT2C     | synonymous_variant  | 921  | L   | NM_170606.2:c.2763A>G            | NM_170606.2    | c.2763A>G               | NP_733751.2    | NM_170606.2:c.2763A>G(p.=)   |
| KMT2C-7-151935798-G>G/T                 | KMT2C     | synonymous_variant  | 882  | I   | NM_170606.2:c.2646C>A            | NM_170606.2    | c.2646C>A               | NP_733751.2    | NM_170606.2:c.2646C>A(p.=)   |
| KMT2C-7-151935799-A>A/G                 | KMT2C     | missense_variant    | 882  | I/T | NM_170606.2:c.2645T>C            | NM_170606.2    | c.2645T>C               | NP_733751.2    | NP_733751.2:p.Ile882Thr      |
| KMT2C-7-151935866-G>G/A                 | KMT2C     | missense_variant    | 860  | P/S | NM_170606.2:c.2578C>T            | NM_170606.2    | c.2578C>T               | NP_733751.2    | NP_733751.2:p.Pro860Ser      |
| KMT2C-7-151935871-C>C/A                 | KMT2C     | missense_variant    | 858  | W/L | NM_170606.2:c.2573G>T            | NM_170606.2    | c.2573G>T               | NP_733751.2    | NP_733751.2:p.Trp858Leu      |
| DPP6-7-154143378-C>C/T                  | DPP6      | missense_variant    | 44   | S/F |                                  | NM_001039350   |                         | NA             | NA                           |
| CSMD1-8-3165949-G>G/C                   | CSMD1     | synonymous_variant  | 1236 | T   | NM_033225.5:c.3708C>G            | NM_033225.5    | c.3708C>G               | NP_150094.5    | NM_033225.5:c.3708C>G(p.=)   |
| GATA4-8-11614524-G>G/C                  | GATA4     | missense_variant    | 360  | E/Q | NM_002052.3:c.1078G>C            | NM_002052.3    | c.1078G>C               | NP_002043.2    | NP_002043.2:p.Glu360Gln      |

|                            |         |                     |      |     |                                   |                |                    |                |                              |
|----------------------------|---------|---------------------|------|-----|-----------------------------------|----------------|--------------------|----------------|------------------------------|
| NEIL2-8-11637247-C>C/T     | NEIL2   | synonymous_variant  | 93   | S   | NM_001135746.1:c.279C>T           | NM_001135746.1 | c.279C>T           | NP_001129218.1 | NM_001135746.1:c.279C>T(p.=) |
| MTUS1-8-17581312-G>G/A     | MTUS1   | missense_variant    | 773  | S/L | NM_001001924.2:c.2318C>T          | NM_001001924.2 | c.2318C>T          | NP_001001924.1 | NP_001001924.1:p.Ser773Leu   |
| LOXL2-8-23198540-G>G/A     | LOXL2   | synonymous_variant  | 236  | F   | NM_002318.2:c.708C>T              | NM_002318.2    | c.708C>T           | NP_002309.1    | NM_002318.2:c.708C>T(p.=)    |
| NEFL-8-24813363-G>G/A      | NEFL    | synonymous_variant  | 223  | L   | NM_006158.3:c.667C>T              | NM_006158.3    | c.667C>T           | NP_006149.2    | NM_006158.3:c.667C>T(p.=)    |
| CLU-8-27455628-G>G/A       | CLU     | 3_prime_UTR_variant | 0    | NA  | NM_001831.3:c.*130C>T             | NM_001831.3    | c.*130C>T          | NP_001822.3    | NA                           |
| FGFR1-8-38297874-C>C/T     | FGFR1   | intron_variant      | 0    | NA  | NM_001174067.1:c.191-10408G>A     | NM_001174067.1 | c.191-10408G>A     | NP_001167538.1 | NA                           |
| ANK1-8-41552304-C>C/T      | ANK1    | missense_variant    | 1086 | E/K | NM_001142446.1:c.3256G>A          | NM_001142446.1 | c.3256G>A          | NP_001135918.1 | NP_001135918.1:p.Glu1086Lys  |
| PRKDC-8-48696360-G>G/A     | PRKDC   | missense_variant    | 3706 | T/M | NM_006904.6:c.11117C>T            | NM_006904.6    | c.11117C>T         | NP_008835.5    | NP_008835.5:p.Thr3706Met     |
| TPPA-8-63978658-TA>T/T     | TPPA    | intron_variant      | 0    | NA  | NM_000370.3:c.359-3delT           | NM_000370.3    | c.359-3delT        | NP_000361.1    | NA                           |
| ZFHX4-8-77764310-T>T/C     | ZFHX4   | missense_variant    | 1718 | F/S | NM_0024721.4:c.5153T>C            | NM_0024721.4   | c.5153T>C          | NP_078997.4    | NP_078997.4:p.Phe1718Ser     |
| CA2-8-86377539-G>G/A       | CA2     | missense_variant    | 25   | G/R | NM_000067.2:c.73G>A               | NM_000067.2    | c.73G>A            | NP_000058.1    | NP_000058.1:p.Gly25Arg       |
| UQCRB-8-97242133-ACT>ACT/A | UQCRB   | 3_prime_UTR_variant | 0    | NA  | NM_001254752.1:c.*1198_*1199delAG | NM_001254752.1 | c.*1198_*1199delAG | NP_001241681.1 | NA                           |
| VPS13B-8-100844845-C>C/T   | VPS13B  | synonymous_variant  | 3218 | P   | NM_017890.4:c.9654C>T             | NM_017890.4    | c.9654C>T          | NP_060360.3    | NM_017890.4:c.9654C>T(p.=)   |
| TAF2-8-120816184-C>C/T     | TAF2    | missense_variant    | 165  | S/N | NM_003184.3:c.494G>A              | NM_003184.3    | c.494G>A           | NP_003175.1    | NP_003175.1:p.Ser165Asn      |
| TG-8-133899575-G>G/A       | TG      | missense_variant    | 653  | G/D | NM_003235.4:c.1958G>A             | NM_003235.4    | c.1958G>A          | NP_003226.4    | NP_003226.4:p.Gly653Asp      |
| TG-8-134125778-G>G/A       | TG      | stop_gained         | 2562 | W/* | NM_003235.4:c.7685G>A             | NM_003235.4    | c.7685G>A          | NP_003226.4    | NP_003226.4:p.Trp2562Ter     |
| TRAPPC9-8-141294071-G>G/C  | TRAPPC9 | missense_variant    | 775  | N/K | NM_031466.5:c.2325C>G             | NM_031466.5    | c.2325C>G          | NP_113654.4    | NP_113654.4:p.Asn775Lys      |
| ZC3H3-8-144522426-G>G/A    | ZC3H3   | missense_variant    | 867  | P/L | NM_015117.2:c.2600C>T             | NM_015117.2    | c.2600C>T          | NP_055932.2    | NP_055932.2:p.Pro867Leu      |
| PLEC-8-145007478-C>C/T     | PLEC    | synonymous_variant  | 572  | A   | NM_201380.2:c.1716G>A             | NM_201380.2    | c.1716G>A          | NP_958782.1    | NM_201380.2:c.1716G>A(p.=)   |
| SLC1A1-9-4567705-G>G/A     | SLC1A1  | missense_variant    | 174  | D/N | NM_004170.5:c.520G>A              | NM_004170.5    | c.520G>A           | NP_004161.4    | NP_004161.4:p.Asp174Asn      |
| SLC1A1-9-4573903-C>C/T     | SLC1A1  | intron_variant      | 0    | NA  | NM_004170.5:c.768-4C>T            | NM_004170.5    | c.768-4C>T         | NP_004161.4    | NA                           |
| JAK2-9-5054648-C>C/T       | JAK2    | missense_variant    | 234  | R/C | NM_004972.3:c.700C>T              | NM_004972.3    | c.700C>T           | NP_004963.1    | NP_004963.1:p.Arg234Cys      |
| GLDC-9-6595126-G>G/C       | GLDC    | intron_variant      | 0    | NA  | NM_000170.2:c.1156-7C>G           | NM_000170.2    | c.1156-7C>G        | NP_000161.2    | NA                           |
| IFNA10-9-21206743-G>G/T    | IFNA10  | missense_variant    | 118  | D/E | NM_002171.1:c.354C>A              | NM_002171.1    | c.354C>A           | NP_002162.1    | NP_002162.1:p.Asp118Glu      |
| AQP7-9-33386144-G>G/A      | AQP7    | synonymous_variant  | 152  | V   | NM_001170.1:c.456C>T              | NM_001170.1    | c.456C>T           | NP_001161.1    | NM_001170.1:c.456C>T(p.=)    |
| AQP7-9-33386146-C>C/A      | AQP7    | missense_variant    | 152  | V/F | NM_001170.1:c.454G>T              | NM_001170.1    | c.454G>T           | NP_001161.1    | NP_001161.1:p.Val152Phe      |
| AQP7-9-33386167-G>G/C      | AQP7    | missense_variant    | 145  | Q/E | NM_001170.1:c.433C>G              | NM_001170.1    | c.433C>G           | NP_001161.1    | NP_001161.1:p.Gln145Glu      |
| AQP7-9-33386465-A>A/G      | AQP7    | missense_variant    | 115  | Y/H | NM_001170.1:c.343T>C              | NM_001170.1    | c.343T>C           | NP_001161.1    | NP_001161.1:p.Tyr115His      |
| AQP7-9-33386469-C>C/T      | AQP7    | synonymous_variant  | 113  | P   | NM_001170.1:c.339G>A              | NM_001170.1    | c.339G>A           | NP_001161.1    | NM_001170.1:c.339G>A(p.=)    |
| AQP7-9-33386510-C>C/T      | AQP7    | missense_variant    | 100  | A/T | NM_001170.1:c.298G>A              | NM_001170.1    | c.298G>A           | NP_001161.1    | NP_001161.1:p.Ala100Thr      |
| AQP7-9-33386511-A>A/G      | AQP7    | synonymous_variant  | 99   | F   | NM_001170.1:c.297T>C              | NM_001170.1    | c.297T>C           | NP_001161.1    | NM_001170.1:c.297T>C(p.=)    |
| AQP7-9-33386526-G>G/A      | AQP7    | synonymous_variant  | 94   | N   | NM_001170.1:c.282C>T              | NM_001170.1    | c.282C>T           | NP_001161.1    | NM_001170.1:c.282C>T(p.=)    |
| TPM2-9-35683240-T>T/TG     | TPM2    | intron_variant      | 0    | NA  | NM_213674.1:c.772+1002dupC        | NM_213674.1    | c.772+1002dupC     | NP_998839.1    | NA                           |
| VPS13A-9-79867181-G>G/A    | VPS13A  | missense_variant    | 734  | S/N | NM_033305.2:c.2201G>A             | NM_033305.2    | c.2201G>A          | NP_150648.2    | NP_150648.2:p.Ser734Asn      |
| DAPK1-9-90322189-C>C/T     | DAPK1   | synonymous_variant  | 1401 | I   | NM_004938.2:c.4203C>T             | NM_004938.2    | c.4203C>T          | NP_004929.2    | NM_004938.2:c.4203C>T(p.=)   |
| NINJ1-9-95888872-C>C/T     | NINJ1   | missense_variant    | 42   | A/T | NM_004148.3:c.124G>A              | NM_004148.3    | c.124G>A           | NP_004139.2    | NP_004139.2:p.Ala42Thr       |
| ALG2-9-101978997-C>C/T     | ALG2    | 3_prime_UTR_variant | 0    | NA  | NM_033087.3:c.*1219G>A            | NM_033087.3    | c.*1219G>A         | NP_149078.1    | NA                           |
| INVS-9-103060213-T>T/G     | INVS    | intron_variant      | 0    | NA  | NM_014425.3:c.3017-5T>G           | NM_014425.3    | c.3017-5T>G        | NP_055240.2    | NA                           |
| GRIN3A-9-104499916-C>C/T   | GRIN3A  | missense_variant    | 116  | G/S | NM_133445.2:c.346G>A              | NM_133445.2    | c.346G>A           | NP_597702.2    | NP_597702.2:p.Gly116Ser      |
| TSC1-9-135781132-T>T/C     | TSC1    | synonymous_variant  | 611  | A   | NM_000368.4:c.1833A>G             | NM_000368.4    | c.1833A>G          | NP_000359.1    | NM_000368.4:c.1833A>G(p.=)   |
| CEL-9-135940587-C>C/T      | CEL     | synonymous_variant  | 170  | P   | NM_001807.3:c.510C>T              | NM_001807.3    | c.510C>T           | NP_001798.2    | NM_001807.3:c.510C>T(p.=)    |
| CEL-9-135940588-C>C/T      | CEL     | missense_variant    | 171  | L/F | NM_001807.3:c.511C>T              | NM_001807.3    | c.511C>T           | NP_001798.2    | NP_001798.2:p.Leu171Phe      |
| CEL-9-135944524-C>C/T      | CEL     | synonymous_variant  | 391  | T   | NM_001807.3:c.1173C>T             | NM_001807.3    | c.1173C>T          | NP_001798.2    | NM_001807.3:c.1173C>T(p.=)   |

|                                                            |           |                    |      |       |                                                  |                |                                      |                |                               |
|------------------------------------------------------------|-----------|--------------------|------|-------|--------------------------------------------------|----------------|--------------------------------------|----------------|-------------------------------|
| RALGDS-9-135974040-G>G/A                                   | RALGDS    | synonymous_variant | 893  | H     | NM_006266.2:c.2679C>T                            | NM_006266.2    | c.2679C>T                            | NP_006257.1    | NM_006266.2:c.2679C>T(p.=)    |
| GBGT1-9-136036927-TA>TA/T                                  | GBGT1     | intron_variant     | 0    | NA    | NM_021996.4:c.72-9delT                           | NM_021996.4    | c.72-9delT                           | NP_068836.2    | NA                            |
| ADAMTSL2-9-136434598-A>G/G                                 | ADAMTSL2  | synonymous_variant | 771  | V     | NM_001145320.1:c.2313A>G                         | NM_001145320.1 | c.2313A>G                            | NP_001138792.1 | NM_001145320.1:c.2313A>G(p.=) |
| ADAMTSL2-9-136435473-C>T/T                                 | ADAMTSL2  | synonymous_variant | 812  | R     | NM_001145320.1:c.2436C>T                         | NM_001145320.1 | c.2436C>T                            | NP_001138792.1 | NM_001145320.1:c.2436C>T(p.=) |
| MAN1B1-9-140000648-C>C/T                                   | MAN1B1    | synonymous_variant | 442  | F     | NM_016219.4:c.1326C>T                            | NM_016219.4    | c.1326C>T                            | NP_057303.2    | NM_016219.4:c.1326C>T(p.=)    |
| TPRN-9-140093903-G>G/A                                     | TPRN      | missense_variant   | 421  | P/S   | NM_001128228.2:c.1261C>T                         | NM_001128228.2 | c.1261C>T                            | NP_001121700.2 | NP_001121700.2:p.Pro421Ser    |
| DCLRE1C-10-14968831-G>G/A                                  | DCLRE1C   | intron_variant     | 0    | NA    | NM_001033855.1:c.972+11C>T                       | NM_001033855.1 | c.972+11C>T                          | NP_001029027.1 | NA                            |
| GAD2-10-26569981-C>C/T                                     | GAD2      | missense_variant   | 401  | P/S   | NM_000818.2:c.1201C>T                            | NM_000818.2    | c.1201C>T                            | NP_000809.1    | NP_000809.1:p.Pro401Ser       |
| ZEB1-10-31809400-C>C/T                                     | ZEB1      | synonymous_variant | 380  | G     | NM_001174096.1:c.1140C>T                         | NM_001174096.1 | c.1140C>T                            | NP_001167567.1 | NM_001174096.1:c.1140C>T(p.=) |
| PCDH15-10-55600246-G>G/A                                   | PCDH15    | missense_variant   | 1278 | R/C   | NM_001142763.1:c.3832C>T                         | NM_001142763.1 | c.3832C>T                            | NP_001136235.1 | NP_001136235.1:p.Arg1278Cys   |
| MYPN-10-69905257-C>C/T                                     | MYPN      | synonymous_variant | 368  | G     | NM_001256267.1:c.1104C>T                         | NM_001256267.1 | c.1104C>T                            | NP_001243196.1 | NM_001256267.1:c.1104C>T(p.=) |
| KAT6B-10-76781905-GGAA>GGAA/G                              | KAT6B     | inframe            | 1097 | E/-   | NM_012330.3:c.3289_3291delGA                     | NM_012330.3    | c.3289_3291delGAA                    | NP_036462.2    | NP_036462.2:p.Glu1097del      |
| DLG5-10-79576332-G>G/A                                     | DLG5      | synonymous_variant | 1334 | S     | NM_004747.3:c.4002C>T                            | NM_004747.3    | c.4002C>T                            | NP_004738.3    | NM_004747.3:c.4002C>T(p.=)    |
| ANXA11-10-81925960-G>G/C                                   | ANXA11    | intron_variant     | 0    | NA    | NM_001157.2:c.745-7C>G                           | NM_001157.2    | c.745-7C>G                           | NP_001148.1    | NA                            |
| ANXA11-10-81926659-G>G/A                                   | ANXA11    | missense_variant   | 244  | T/M   | NM_001157.2:c.731C>T                             | NM_001157.2    | c.731C>T                             | NP_001148.1    | NP_001148.1:p.Thr244Met       |
| PAPSS2-10-89469057-C>C/G                                   | PAPSS2    | synonymous_variant | 44   | T     | NM_001015880.1:c.132C>G                          | NM_001015880.1 | c.132C>G                             | NP_001015880.1 | NM_001015880.1:c.132C>G(p.=)  |
| ANKRD1-10-92678740-AAATAAATAATATATATAT>AAATAAATAATATATAT/A | ANKRD1    | intron_variant     | 0    | NA    | NM_014391.2:c.346-29_346-12delATATATATATTTATTTAT | NM_014391.2    | c.346-29_346-12delATATATATATTTATTTAT | NP_055206.2    | NA                            |
| FFAR4-10-95347307-G>G/A                                    | FFAR4     | missense_variant   | 359  | G/R   | NM_181745.3:c.1075G>A                            | NM_181745.3    | c.1075G>A                            | NP_859529.2    | NP_859529.2:p.Gly359Arg       |
| PLCE1-10-95791566-C>C/T                                    | PLCE1     | missense_variant   | 255  | H/Y   | NM_016341.3:c.763C>T                             | NM_016341.3    | c.763C>T                             | NP_057425.3    | NP_057425.3:p.His255Tyr       |
| CYP2C9-10-96741038-G>G/A                                   | CYP2C9    | missense_variant   | 354  | E/K   | NM_000771.3:c.1060G>A                            | NM_000771.3    | c.1060G>A                            | NP_000762.2    | NP_000762.2:p.Glu354Lys       |
| CYP2C8-10-96824553-T>T/G                                   | CYP2C8    | intron_variant     | 0    | NA    | NM_000770.3:c.642+4A>C                           | NM_000770.3    | c.642+4A>C                           | NP_000761.3    | NA                            |
| GOT1-10-101180557-G>G/A                                    | GOT1      | missense_variant   | 42   | R/C   | NM_002079.2:c.124C>T                             | NM_002079.2    | c.124C>T                             | NP_002070.1    | NP_002070.1:p.Arg42Cys        |
| WDR11-10-122664835-C>C/T                                   | WDR11     | synonymous_variant | 1066 | G     | NM_018117.11:c.3198C>T                           | NM_018117.11   | c.3198C>T                            | NP_060587.8    | NM_018117.11:c.3198C>T(p.=)   |
| MGMT-10-131557574-G>G/A                                    | MGMT      | missense_variant   | 159  | R/Q   | NM_002412.3:c.476G>A                             | NM_002412.3    | c.476G>A                             | NP_002403.2    | NP_002403.2:p.Arg159Gln       |
| MUC5B-11-1253942-T>T/C                                     | MUC5B     | synonymous_variant | 669  | Y     | NM_002458.2:c.2007T>C                            | NM_002458.2    | c.2007T>C                            | NP_002449.2    | NM_002458.2:c.2007T>C(p.=)    |
| SMPD1-11-6411935-TGCTGGC>T/T                               | SMPD1     | inframe            | NA   | VLA/V | NM_000543.4:c.108_113delGCTGGC                   | NM_000543.4    | c.108_113delGCTGGC                   | NP_000534.3    | NP_000534.3:p.Leu37_Ala38del  |
| SAA2-SAA4.SAA2-11-18267463-A>A/G                           | SAA2.SAA2 | missense_variant   | 75   | V/A   | NM_030754.4:c.224T>C                             | NM_030754.4    | c.224T>C                             | NP_110381.2    | NP_110381.2:p.Val75Ala        |
| SAA2-SAA4.SAA2-11-18267478-G>G/A                           | SAA2.SAA2 | missense_variant   | 70   | A/V   | NM_030754.4:c.209C>T                             | NM_030754.4    | c.209C>T                             | NP_110381.2    | NP_110381.2:p.Ala70Val        |
| WT1-AS-11-32461025-A>A/AGG                                 | WT1-AS    | nc_exon_variant    | 0    | NA    | NR_023920.1:n.1743_1744insGG                     | NR_023920.1    | n.1743_1744insGG                     | NA             | NA                            |
| MYBPC3-11-47372812-G>G/A                                   | MYBPC3    | synonymous_variant | 90   | F     | NM_000256.3:c.270C>T                             | NM_000256.3    | c.270C>T                             | NP_000247.2    | NM_000256.3:c.270C>T(p.=)     |
| TMEM216-11-61165741-G>C/C                                  | TMEM216   | missense_variant   | 147  | R/T   | NM_001173991.2:c.440G>C                          | NM_001173991.2 | c.440G>C                             | NP_001167462.1 | NP_001167462.1:p.Arg147Thr    |
| GAL3ST3-11-65810470-G>G/A                                  | GAL3ST3   | synonymous_variant | 268  | N     | NM_033036.2:c.804C>T                             | NM_033036.2    | c.804C>T                             | NP_149025.1    | NM_033036.2:c.804C>T(p.=)     |

|                                |          |                     |      |      |                                |                |                    |                |                                 |
|--------------------------------|----------|---------------------|------|------|--------------------------------|----------------|--------------------|----------------|---------------------------------|
| UNC93B1-11-67765163-A>AG/AG    | UNC93B1  | frameshift_variant  | 296  | NA   | NM_030930.2:c.887dupC          | NM_030930.2    | c.887dupC          | NP_112192.2    | NP_112192.2;p.Ser297PhefsTer302 |
| SERPINH1-11-75277974-C>C/A     | SERPINH1 | missense_variant    | 194  | R/S  | NM_001235.3:c.580C>A           | NM_001235.3    | c.580C>A           | NP_001226.2    | NP_001226.2;p.Arg194Ser         |
| MMP12-11-102738793-G>GT/GT     | MMP12    | frameshift_variant  | 211  | NA   | NM_002426.4:c.631dupA          | NM_002426.4    | c.631dupA          | NP_002417.2    | NP_002417.2;p.Thr211AsnfsTer261 |
| MMP12-11-102738795-G>T/T       | MMP12    | synonymous_variant  | 210  | T    | NM_002426.4:c.630C>A           | NM_002426.4    | c.630C>A           | NP_002417.2    | NM_002426.4:c.630C>A(p.=)       |
| ATM-11-108119712-C>C/A         | ATM      | missense_variant    | 373  | T/K  | NM_000051.3:c.1118C>A          | NM_000051.3    | c.1118C>A          | NP_000042.3    | NP_000042.3;p.Thr373Lys         |
| ANKK1-11-113269718-C>C/T       | ANKK1    | missense_variant    | 343  | L/F  | NM_178510.1:c.1027C>T          | NM_178510.1    | c.1027C>T          | NP_848605.1    | NP_848605.1;p.Leu343Phe         |
| CADM1-11-115085329-G>G/A       | CADM1    | synonymous_variant  | 331  | Y    | NM_014333.3:c.993C>T           | NM_014333.3    | c.993C>T           | NP_055148.3    | NM_014333.3:c.993C>T(p.=)       |
| CBL-11-119149312-C>C/T         | CBL      | synonymous_variant  | 440  | G    | NM_005188.3:c.1320C>T          | NM_005188.3    | c.1320C>T          | NP_005179.2    | NM_005188.3:c.1320C>T(p.=)      |
| WNK1-12-988802-C>C/T           | WNK1     | intron_variant      | 0    | NA   | NM_001184985.1:c.3613-1085C>T  | NM_001184985.1 | c.3613-1085C>T     | NP_001171914.1 | NA                              |
| WNK1-12-988803-C>C/G           | WNK1     | intron_variant      | 0    | NA   | NM_001184985.1:c.3613-1084C>G  | NM_001184985.1 | c.3613-1084C>G     | NP_001171914.1 | NA                              |
| CACNA2D4-12-1919467-G>G/A      | CACNA2D4 | synonymous_variant  | 900  | L    | NM_172364.4:c.2698C>T          | NM_172364.4    | c.2698C>T          | NP_758952.4    | NM_172364.4:c.2698C>T(p.=)      |
| CACNA1C-12-2774062-C>C/T       | CACNA1C  | missense_variant    | 1483 | S/F  | NM_199460.2:c.4448C>T          | NM_199460.2    | c.4448C>T          | NP_955630.2    | NP_955630.2;p.Ser1483Phe        |
| EMG1-12-7080210-A>AG/AG        | EMG1     | frameshift_variant  | 42   | NA   | NM_006331.7:c.124_125insG      | NM_006331.7    | c.124_125insG      | NP_006322.4    | NP_006322.4;p.Ser42ArgfsTer204  |
| EMG1-12-7080212-T>C/C          | EMG1     | synonymous_variant  | 42   | S    | NM_006331.7:c.126T>C           | NM_006331.7    | c.126T>C           | NP_006322.4    | NM_006331.7:c.126T>C(p.=)       |
| PRB3-12-11420333-AG>A/A        | PRB3     | frameshift_variant  | 241  | NA   | NM_006249.4:c.723delC          | NM_006249.4    | c.723delC          | NP_006240.4    | NP_006240.4;p.Ser242HisfsTer69  |
| GRIN2B-12-13716542-G>G/A       | GRIN2B   | synonymous_variant  | 1210 | S    | NM_000834.3:c.3630C>T          | NM_000834.3    | c.3630C>T          | NP_000825.2    | NM_000834.3:c.3630C>T(p.=)      |
| PIK3C2G-12-18644400-G>G/A      | PIK3C2G  | missense_variant    | 860  | E/K  | NM_004570.4:c.2578G>A          | NM_004570.4    | c.2578G>A          | NP_004561.3    | NP_004561.3;p.Glu860Lys         |
| SLCO1B3-12-21028298-C>C/T      | SLCO1B3  | missense_variant    | 286  | P/L  | NM_019844.3:c.857C>T           | NM_019844.3    | c.857C>T           | NP_062818.1    | NP_062818.1;p.Pro286Leu         |
| DDX11-12-31242358-G>G/A        | DDX11    | missense_variant    | 272  | V/M  | NM_001257144.1:c.814G>A        | NM_001257144.1 | c.814G>A           | NP_001244073.1 | NP_001244073.1;p.Val272Met      |
| DDX11-12-31247682-T>T/C        | DDX11    | intron_variant      | 0    | NA   | NM_001257144.1:c.1415-7T>C     | NM_001257144.1 | c.1415-7T>C        | NP_001244073.1 | NA                              |
| PKP2-12-32955454-C>C/T         | PKP2     | missense_variant    | 728  | E/K  | NM_004572.3:c.2182G>A          | NM_004572.3    | c.2182G>A          | NP_004563.2    | NP_004563.2;p.Glu728Lys         |
| ANO6-12-45822896-C>C/T         | ANO6     | synonymous_variant  | 866  | I    | NM_001204803.1:c.2598C>T       | NM_001204803.1 | c.2598C>T          | NP_001191732.1 | NM_001204803.1:c.2598C>T(p.=)   |
| KRT1-12-53074020-C>C/T         | KRT1     | missense_variant    | 38   | R/H  | NM_006121.3:c.113G>A           | NM_006121.3    | c.113G>A           | NP_006112.3    | NP_006112.3;p.Arg38His          |
| AMHR2-12-53819230-C>C/T        | AMHR2    | intron_variant      | 0    | NA   | NM_020547.2:c.503-9C>T         | NM_020547.2    | c.503-9C>T         | NP_065434.1    | NA                              |
| SMUG1-12-54577582-G>G/A        | SMUG1    | missense_variant    | 48   | S/L  | NM_001243787.1:c.143C>T        | NM_001243787.1 | c.143C>T           | NP_001230716.1 | NP_001230716.1;p.Ser48Leu       |
| STAT6-12-57499387-G>G/A        | STAT6    | intron_variant      | 0    | NA   | NM_003153.4:c.681-5C>T         | NM_003153.4    | c.681-5C>T         | NP_003144.3    | NA                              |
| STAT6-12-57499388-G>G/A        | STAT6    | intron_variant      | 0    | NA   | NM_003153.4:c.681-6C>T         | NM_003153.4    | c.681-6C>T         | NP_003144.3    | NA                              |
| PAWR-12-80014907-A>T/T         | PAWR     | synonymous_variant  | 199  | I    | NM_002583.2:c.597T>A           | NM_002583.2    | c.597T>A           | NP_002574.2    | NM_002583.2:c.597T>A(p.=)       |
| PTPRQ-12-81014013-C>C/T        | PTPRQ    | synonymous_variant  | 1672 | F    | NM_001145026.1:c.5016C>T       | NM_001145026.1 | c.5016C>T          | NP_001138498.1 | NM_001145026.1:c.5016C>T(p.=)   |
| CEP290-12-88483184-A>A/G       | CEP290   | synonymous_variant  | 1218 | L    | NM_025114.3:c.3654T>C          | NM_025114.3    | c.3654T>C          | NP_079390.3    | NM_025114.3:c.3654T>C(p.=)      |
| ACACB-12-109631451-A>A/C       | ACACB    | splice_variant      | 0    | NA   | NM_001093.3:c.2400-2A>C        | NM_001093.3    | c.2400-2A>C        | NP_001084.3    | NA                              |
| ACACB-12-109703311-GTCC>GTCC/G | ACACB    | inframe             | NA   | VL/V | NM_001093.3:c.7232_7234delTCC  | NM_001093.3    | c.7232_7234delTCC  | NP_001084.3    | NP_001084.3;p.Leu2412del        |
| MMAB-12-109992958-T>T/TA       | MMAB     | 3_prime_UTR_variant | 0    | NA   | NM_052845.3:c.*1873_*1874dupTA | NM_052845.3    | c.*1873_*1874dupTA | NP_443077.1    | NA                              |
| SETD8-12-123892095-T>T/C       | SETD8    | missense_variant    | 302  | C/R  | NM_020382.3:c.904T>C           | NM_020382.3    | c.904T>C           | NP_065115.3    | NP_065115.3;p.Cys302Arg         |
| SETD8-12-123892235-G>G/A       | SETD8    | synonymous_variant  | 348  | P    | NM_020382.3:c.1044G>A          | NM_020382.3    | c.1044G>A          | NP_065115.3    | NM_020382.3:c.1044G>A(p.=)      |
| SCARB1-12-125299559-G>G/A      | SCARB1   | missense_variant    | 129  | S/L  | NM_005505.4:c.386C>T           | NM_005505.4    | c.386C>T           | NP_005496.4    | NP_005496.4;p.Ser129Leu         |



|                                  |               |                             |      |     |                                       |                |                         |                |                               |
|----------------------------------|---------------|-----------------------------|------|-----|---------------------------------------|----------------|-------------------------|----------------|-------------------------------|
| GALNT9-12-132683770-C>C/T        | GALNT9        | synonymous_variant          | NA   | A   |                                       | NM_021808      |                         | NA             | NA                            |
| GOLGA3-12-133350849-G>G/A        | GOLGA3        | missense_variant            | 1401 | P/S | NM_005895.3:c.4201C>T                 | NM_005895.3    | c.4201C>T               | NP_005886.2    | NP_005886.2:p.Pro1401Ser      |
| ALOX5AP-13-31287979-G>GTA/GTA    | ALOX5AP       | splice_variant              | 0    | NA  | NM_001204406.1:c.116+1_116+2insTA     | NM_001204406.1 | c.116+1_116+2insTA      | NP_001191335.1 | NA                            |
| B3GALTL-13-31821152-T>T/C        | B3GALTL       | intron_variant              | 0    | NA  | NM_194318.3:c.271-8T>C                | NM_194318.3    | c.271-8T>C              | NP_919299.3    | NA                            |
| B3GALTL-13-31903679-A>A/G        | B3GALTL       | synonymous_variant          | 457  | Q   | NM_194318.3:c.1371A>G                 | NM_194318.3    | c.1371A>G               | NP_919299.3    | NM_194318.3:c.1371A>G(p.=)    |
| RXFP2-13-32356863-C>C/T          | RXFP2         | missense_variant            | 303  | S/L | NM_130806.3:c.908C>T                  | NM_130806.3    | c.908C>T                | NP_570718.1    | NP_570718.1:p.Ser303Leu       |
| COG6-13-40229756-C>C/T           | COG6          | up-down_stream_gene_variant | 0    | NA  |                                       | NM_020751.2    |                         | NP_065802.1    | NA                            |
| CPB2-AS1.CPB2-13-46658424-G>G/A  | CPB2-AS1.CPB2 | intron_variant              | 0    | NA  | NR_046226.1:n.119-10564G>A            | NR_046226.1    | n.119-10564G>A          | NA             | NA                            |
| DIAPH3-13-60385060-A>ATTAC/ATTAC | DIAPH3        | intron_variant              | 0    | NA  | NM_001042517.1:c.3028-4_3028-3insGTAA | NM_001042517.1 | c.3028-4_3028-3insGTAA  | NP_001035982.1 | NA                            |
| DOCK9-13-99512723-C>C/G          | DOCK9         | synonymous_variant          | 1212 | P   | NM_015296.2:c.3636G>C                 | NM_015296.2    | c.3636G>C               | NP_056111.1    | NM_015296.2:c.3636G>C(p.=)    |
| PROZ-13-113818817-T>TC/TC        | PROZ          | intron_variant              | 0    | NA  | NM_001256134.1:c.440-10_440-9insC     | NM_001256134.1 | c.440-10_440-9insC      | NP_001243063.1 | NA                            |
| RPGRIP1-14-21796751-C>C/T        | RPGRIP1       | missense_variant            | 1022 | L/F | NM_020366.3:c.3064C>T                 | NM_020366.3    | c.3064C>T               | NP_065099.3    | NP_065099.3:p.Leu1022Phe      |
| MYH7-14-23888685-G>G/A           | MYH7          | intron_variant              | 0    | NA  | NM_000257.2:c.3853+7C>T               | NM_000257.2    | c.3853+7C>T             | NP_000248.2    | NA                            |
| CFL2-14-35179728-C>C/T           | CFL2          | 3_prime_UTR_variant         | 0    | NA  | NM_021914.7:c.*2343G>A                | NM_021914.7    | c.*2343G>A              | NP_068733.1    | NA                            |
| SEC23A-14-39502539-G>GA/GA       | SEC23A        | intron_variant              | 0    | NA  | NM_006364.2:c.2209-8dupT              | NM_006364.2    | c.2209-8dupT            | NP_006355.2    | NA                            |
| PTGER2-14-52782001-C>C/A         | PTGER2        | synonymous_variant          | 245  | P   | NM_000956.3:c.735C>A                  | NM_000956.3    | c.735C>A                | NP_000947.2    | NM_000956.3:c.735C>A(p.=)     |
| OTX2-14-57268545-T>T/G           | OTX2          | missense_variant            | 268  | K/Q | NM_001270525.1:c.802A>C               | NM_001270525.1 | c.802A>C                | NP_001257454.1 | NP_001257454.1:p.Lys268Gln    |
| HIF1A-14-62207553-G>G/A          | HIF1A         | synonymous_variant          | 604  | L   | NM_001243084.1:c.1812G>A              | NM_001243084.1 | c.1812G>A               | NP_001230013.1 | NM_001243084.1:c.1812G>A(p.=) |
| CCDC88C-14-91755563-C>C/T        | CCDC88C       | missense_variant            | 1443 | A/T | NM_001080414.3:c.4327G>A              | NM_001080414.3 | c.4327G>A               | NP_001073883.2 | NP_001073883.2:p.Ala1443Thr   |
| JAG2-14-105609822-T>T/C          | JAG2          | missense_variant            | 1080 | T/A | NM_002226.4:c.3238A>G                 | NM_002226.4    | c.3238A>G               | NP_002217.3    | NP_002217.3:p.Thr1080Ala      |
| MAGEL2-15-23889763-G>G/C         | MAGEL2        | missense_variant            | 1043 | R/G | NM_019066.4:c.3127C>G                 | NM_019066.4    | c.3127C>G               | NP_061939.3    | NP_061939.3:p.Arg1043Gly      |
| MAGEL2-15-23890004-G>G/A         | MAGEL2        | synonymous_variant          | 962  | S   | NM_019066.4:c.2886C>T                 | NM_019066.4    | c.2886C>T               | NP_061939.3    | NM_019066.4:c.2886C>T(p.=)    |
| PWRN1-15-24832739-C>C/T          | PWRN1         | nc_exon_variant             | 0    | NA  | NR_026646.1:n.1251C>T                 | NR_026646.1    | n.1251C>T               | NA             | NA                            |
| UBE3A-15-25616703-T>T/A          | UBE3A         | synonymous_variant          | 209  | A   | NM_000462.3:c.627A>T                  | NM_000462.3    | c.627A>T                | NP_000453.2    | NM_000462.3:c.627A>T(p.=)     |
| ATP10A-15-26108141-G>G/C         | ATP10A        | missense_variant            | 35   | P/A | NM_024490.3:c.103C>G                  | NM_024490.3    | c.103C>G                | NP_077816.1    | NP_077816.1:p.Pro35Ala        |
| HERC2-15-28408400-G>G/A          | HERC2         | missense_variant            | 3529 | P/L | NM_004667.5:c.10586C>T                | NM_004667.5    | c.10586C>T              | NP_004658.3    | NP_004658.3:p.Pro3529Leu      |
| HERC2-15-28408401-G>G/A          | HERC2         | missense_variant            | 3529 | P/S | NM_004667.5:c.10585C>T                | NM_004667.5    | c.10585C>T              | NP_004658.3    | NP_004658.3:p.Pro3529Ser      |
| HERC2-15-28467246-T>C/C          | HERC2         | synonymous_variant          | 1860 | G   | NM_004667.5:c.5580A>G                 | NM_004667.5    | c.5580A>G               | NP_004658.3    | NM_004667.5:c.5580A>G(p.=)    |
| HERC2-15-28517436-T>T/C          | HERC2         | synonymous_variant          | 336  | P   | NM_004667.5:c.1008A>G                 | NM_004667.5    | c.1008A>G               | NP_004658.3    | NM_004667.5:c.1008A>G(p.=)    |
| SPTBN5-15-42143145-C>C/CCA       | SPTBN5        | intron_variant              | 0    | NA  | NM_016642.2:c.10731-10_10731-9dupTG   | NM_016642.2    | c.10731-10_10731-9dupTG | NP_057726.3    | NA                            |
| UBR1-15-43313515-G>G/A           | UBR1          | synonymous_variant          | 966  | P   | NM_174916.2:c.2898C>T                 | NM_174916.2    | c.2898C>T               | NP_777576.1    | NM_174916.2:c.2898C>T(p.=)    |
| GATM-15-45661653-G>G/A           | GATM          | missense_variant            | 119  | H/Y | NM_001482.2:c.355C>T                  | NM_001482.2    | c.355C>T                | NP_001473.1    | NP_001473.1:p.His119Tyr       |
| HDC-15-50545834-G>G/A            | HDC           | synonymous_variant          | 250  | V   | NM_002112.3:c.750C>T                  | NM_002112.3    | c.750C>T                | NP_002103.2    | NM_002112.3:c.750C>T(p.=)     |
| MTFMT-15-65321780-A>A/T          | MTFMT         | missense_variant            | 58   | F/I | NM_139242.3:c.172T>A                  | NM_139242.3    | c.172T>A                | NP_640335.2    | NP_640335.2:p.Phe58Ile        |
| PML-15-74317251-C>C/T            | PML           | missense_variant            | 413  | P/S | NM_033238.2:c.1237C>T                 | NM_033238.2    | c.1237C>T               | NP_150241.2    | NP_150241.2:p.Pro413Ser       |
| NEIL1-15-75644482-G>G/A          | NEIL1         | synonymous_variant          | 241  | K   | NM_001256552.1:c.723G>A               | NM_001256552.1 | c.723G>A                | NP_001243481.1 | NM_001256552.1:c.723G>A(p.=)  |

|                                                                                                            |         |                                     |      |     |                                                                          |                |                                                               |                |                                |
|------------------------------------------------------------------------------------------------------------|---------|-------------------------------------|------|-----|--------------------------------------------------------------------------|----------------|---------------------------------------------------------------|----------------|--------------------------------|
| PSTPIP1-15-77329409-C>C/T<br>CHRNA3-15-78913067-<br>ACAG>A/A                                               | PSTPIP1 | synonymous_variant                  | 381  | S   | NM_003978.3:c.1143C>T                                                    | NM_003978.3    | c.1143C>T                                                     | NP_003969.2    | NM_003978.3:c.1143C>T(p.=)     |
| AKAP13-15-86265465-A>A/T                                                                                   | CHRNA3  | inframe                             | 23   | L/- | NM_000743.4:c.67_69delCTG                                                | NM_000743.4    | c.67_69delCTG                                                 | NP_000734.2    | NP_000734.2:p.Leu23del         |
| ACAN-15-89382261-G>G/A                                                                                     | AKAP13  | missense_variant                    | 2132 | K/M | NM_006738.4:c.6395A>T                                                    | NM_006738.4    | c.6395A>T                                                     | NP_006729.4    | NP_006729.4:p.Lys2132Met       |
|                                                                                                            | ACAN    | synonymous_variant                  | 146  | L   | NM_013227.3:c.438G>A                                                     | NM_013227.3    | c.438G>A                                                      | NP_037359.3    | NM_013227.3:c.438G>A(p.=)      |
| KIF7-15-90173734-C>CAG/CAG                                                                                 |         |                                     |      |     | NM_198525.2:c.3112-11_3112-<br>10insCT                                   | NM_198525.2    | c.3112-11_3112-10insCT                                        | NP_940927.2    | NA                             |
| IQGAP1-15-91020976-GC>GC/G                                                                                 | KIF7    | intron_variant                      | 0    | NA  |                                                                          |                |                                                               |                |                                |
| IQGAP1-15-91020978-C>C/A                                                                                   | IQGAP1  | frameshift_variant                  | 1062 | NA  | NM_003870.3:c.3185delC                                                   | NM_003870.3    | c.3185delC                                                    | NP_003861.1    | NP_003861.1:p.Arg1063ValfsTer6 |
|                                                                                                            | IQGAP1  | synonymous_variant                  | 1062 | A   | NM_003870.3:c.3186C>A                                                    | NM_003870.3    | c.3186C>A                                                     | NP_003861.1    | NM_003870.3:c.3186C>A(p.=)     |
| LMF1-16-1031305-A>A/T                                                                                      |         | up-<br>down_stream_gene_v<br>ariant | 0    | NA  |                                                                          | NM_014587.3    |                                                               | NP_055402.2    | NA                             |
| CACNA1H-16-1256259-C>C/T                                                                                   | LMF1    | missense_variant                    | 920  | T/M | NM_021098.2:c.2759C>T                                                    | NM_021098.2    | c.2759C>T                                                     | NP_066921.2    | NP_066921.2:p.Thr920Met        |
| TPSB2-16-1278767-C>C/T                                                                                     | CACNA1H | missense_variant                    | 238  | A/T | NM_024164.5:c.712G>A                                                     | NM_024164.5    | c.712G>A                                                      | NP_077078.5    | NP_077078.5:p.Ala238Thr        |
| TPSB2-16-1279732-C>C/A                                                                                     | TPSB2   | missense_variant                    | 23   | G/V | NM_024164.5:c.68G>T                                                      | NM_024164.5    | c.68G>T                                                       | NP_077078.5    | NP_077078.5:p.Gly23Val         |
| TSC2-16-2134508-G>G/T                                                                                      | TPSB2   | missense_variant                    | 1429 | A/S | NM_000548.3:c.4285G>T                                                    | NM_000548.3    | c.4285G>T                                                     | NP_000539.2    | NP_000539.2:p.Ala1429Ser       |
| PKD1-16-2147471-G>G/A                                                                                      | TSC2    | missense_variant                    |      |     |                                                                          |                |                                                               |                |                                |
| PKD1-16-2159255-C>C/T                                                                                      | PKD1    | synonymous_variant                  | 3418 | L   | NM_001009944.2:c.10254C>T                                                | NM_001009944.2 | c.10254C>T                                                    | NP_001009944.2 | NM_001009944.2:c.10254C>T(p.=) |
| PKD1-16-2165395-G>G/A                                                                                      | PKD1    | synonymous_variant                  | 1971 | V   | NM_001009944.2:c.5913G>A                                                 | NM_001009944.2 | c.5913G>A                                                     | NP_001009944.2 | NM_001009944.2:c.5913G>A(p.=)  |
| PKD1-16-2167874-G>A/A                                                                                      | PKD1    | missense_variant                    | 694  | P/L | NM_001009944.2:c.2081C>T                                                 | NM_001009944.2 | c.2081C>T                                                     | NP_001009944.2 | NP_001009944.2:p.Pro694Leu     |
| PKD1-16-2167970-G>A/A                                                                                      | PKD1    | synonymous_variant                  | 373  | L   | NM_001009944.2:c.1119C>T                                                 | NM_001009944.2 | c.1119C>T                                                     | NP_001009944.2 | NM_001009944.2:c.1119C>T(p.=)  |
| PDPK1-16-2647690-C>C/T                                                                                     | PKD1    | synonymous_variant                  | 341  | A   | NM_001009944.2:c.1023C>T                                                 | NM_001009944.2 | c.1023C>T                                                     | NP_001009944.2 | NM_001009944.2:c.1023C>T(p.=)  |
|                                                                                                            | PDPK1   | synonymous_variant                  | 531  | N   | NM_002613.4:c.1593C>T                                                    | NM_002613.4    | c.1593C>T                                                     | NP_002604.1    | NM_002613.4:c.1593C>T(p.=)     |
| CREBBP-16-3820811-G>G/A                                                                                    | CREBBP  | synonymous_variant                  | 880  | P   | NM_004380.2:c.2640C>T                                                    | NM_004380.2    | c.2640C>T                                                     | NP_004371.2    | NM_004380.2:c.2640C>T(p.=)     |
| CREBBP-16-3820812-G>G/A                                                                                    | CREBBP  | missense_variant                    | 880  | P/L | NM_004380.2:c.2639C>T                                                    | NM_004380.2    | c.2639C>T                                                     | NP_004371.2    | NP_004371.2:p.Pro880Leu        |
| USP7-16-9017061-<br>T>TACAACGATGTGGGGGTTTG<br>TAGTTGCATCATTTAA/TACAAC<br>GATGTGGGGTTTGTAGTTGC<br>ATCATTTAA | USP7    | intron_variant                      | 0    | NA  | NM_003470.2:c.383+10_383+11i<br>nsTTAAATGATGCAACTACAAA<br>CCCCACATCGTTGT | NM_003470.2    | c.383+10_383+11insTTAAA<br>TGATGCAACTACAAACCCC<br>CACATCGTTGT | NP_003461.2    | NA                             |
| GRIN2A-16-9857672-C>C/T                                                                                    | GRIN2A  | synonymous_variant                  | 1243 | G   | NM_001134407.1:c.3729G>A                                                 | NM_001134407.1 | c.3729G>A                                                     | NP_001127879.1 | NM_001134407.1:c.3729G>A(p.=)  |
| GRIN2A-16-9858517-C>C/T                                                                                    | GRIN2A  | missense_variant                    | 962  | E/K | NM_001134407.1:c.2884G>A                                                 | NM_001134407.1 | c.2884G>A                                                     | NP_001127879.1 | NP_001127879.1:p.Glu962Lys     |
| LITAF-16-11643394-G>G/A                                                                                    | LITAF   | 3_prime_UTR_variant                 | 0    | NA  | NM_001136472.1:c.*99C>T                                                  | NM_001136472.1 | c.*99C>T                                                      | NP_001129944.1 | NA                             |
| SMG1-16-18900862-A>G/G                                                                                     | SMG1    | synonymous_variant                  | 218  | L   | NM_015092.4:c.654T>C                                                     | NM_015092.4    | c.654T>C                                                      | NP_055907.3    | NM_015092.4:c.654T>C(p.=)      |
| ACSM3.ER12-16-20792417-<br>C>C/T                                                                           | ACSM3.E | missense_variant                    | 302  | H/Y | NM_005622.3:c.904C>T                                                     | NM_005622.3    | c.904C>T                                                      | NP_005613.2    | NP_005613.2:p.His302Tyr        |
| EEF2K-16-22277743-C>C/T                                                                                    | RI2     | synonymous_variant                  | 491  | S   | NM_013302.3:c.1473C>T                                                    | NM_013302.3    | c.1473C>T                                                     | NP_037434.1    | NM_013302.3:c.1473C>T(p.=)     |
| TOX3-16-52473331-G>G/A                                                                                     | EEF2K   | synonymous_variant                  | 513  | R/C | NM_001080430.2:c.1537C>T                                                 | NM_001080430.2 | c.1537C>T                                                     | NP_001073899.2 | NP_001073899.2:p.Arg513Cys     |
| TOX3-16-52484384-G>G/A                                                                                     | TOX3    | missense_variant                    | 161  | T   | NM_001080430.2:c.483C>T                                                  | NM_001080430.2 | c.483C>T                                                      | NP_001073899.2 | NM_001080430.2:c.483C>T(p.=)   |
| CES1-16-55844928-A>A/C                                                                                     | CES1    | intron_variant                      | 0    | NA  | NM_001025195.1:c.1087-6T>G                                               | NM_001025195.1 | c.1087-6T>G                                                   | NP_001020366.1 | NA                             |
| CCL22-16-57394393-T>T/C                                                                                    | CCL22   | missense_variant                    | 40   | Y/H | NM_002990.4:c.118T>C                                                     | NM_002990.4    | c.118T>C                                                      | NP_002981.2    | NP_002981.2:p.Tyr40His         |

|                           |         |                    |      |     |                           |             |               |             |                                |
|---------------------------|---------|--------------------|------|-----|---------------------------|-------------|---------------|-------------|--------------------------------|
| CNGB1-16-57951298-G>G/A   | CNGB1   | synonymous_variant | 680  | F   | NM_001297.4:c.2040C>T     | NM_001297.4 | c.2040C>T     | NP_001288.3 | NM_001297.4:c.2040C>T(p.=)     |
| CDH8-16-62055181-G>G/A    | CDH8    | missense_variant   | 43   | P/S | NM_001796.4:c.127C>T      | NM_001796.4 | c.127C>T      | NP_001787.2 | NM_001787.2:p.Pro43Ser         |
| CDH5-16-66432424-C>T/T    | CDH5    | synonymous_variant | 517  | I   | NM_001795.3:c.1551C>T     | NM_001795.3 | c.1551C>T     | NP_001786.2 | NM_001795.3:c.1551C>T(p.=)     |
| PLEKHG4-16-67314605-C>C/T | PLEKHG4 | intron_variant     | 0    | NA  | NM_015432.3:c.500-9C>T    | NM_015432.3 | c.500-9C>T    | NP_056247.1 | NA                             |
| COG8-16-69368806-G>G/A    | COG8    | missense_variant   | 344  | S/F | NM_032382.4:c.1031C>T     | NM_032382.4 | c.1031C>T     | NP_115758.3 | NP_115758.3:p.Ser344Phe        |
| AARS-16-70298925-C>C/G    | AARS    | synonymous_variant | 476  | R   | NM_001605.2:c.1428G>C     | NM_001605.2 | c.1428G>C     | NP_001596.2 | NM_001605.2:c.1428G>C(p.=)     |
| COG4-16-70557400-C>C/G    | COG4    | missense_variant   | 16   | G/A | NM_015386.2:c.47G>C       | NM_015386.2 | c.47G>C       | NP_056201.2 | NP_056201.2:p.Gly16Ala         |
| HYDIN-16-70884524-C>C/G   | HYDIN   | missense_variant   | 4159 | E/Q | NM_032821.2:c.12475G>C    | NM_032821.2 | c.12475G>C    | NP_116210.2 | NP_116210.2:p.Glu4159Gln       |
| HYDIN-16-70884534-T>T/A   | HYDIN   | synonymous_variant | 4155 | T   | NM_032821.2:c.12465A>T    | NM_032821.2 | c.12465A>T    | NP_116210.2 | NM_032821.2:c.12465A>T(p.=)    |
| HYDIN-16-70896015-GA>GA/G | HYDIN   | frameshift_variant | 3903 | NA  | NM_032821.2:c.11709delT   | NM_032821.2 | c.11709delT   | NP_116210.2 | NP_116210.2:p.Gln3904ArgfsTer5 |
| HYDIN-16-70897039-C>C/G   | HYDIN   | missense_variant   | 3839 | V/L | NM_032821.2:c.11515G>C    | NM_032821.2 | c.11515G>C    | NP_116210.2 | NP_116210.2:p.Val3839Leu       |
| HYDIN-16-70908736-A>A/G   | HYDIN   | synonymous_variant | 3547 | N   | NM_032821.2:c.10641T>C    | NM_032821.2 | c.10641T>C    | NP_116210.2 | NM_032821.2:c.10641T>C(p.=)    |
| HYDIN-16-70913386-G>G/A   | HYDIN   | synonymous_variant | 3456 | T   | NM_032821.2:c.10368C>T    | NM_032821.2 | c.10368C>T    | NP_116210.2 | NM_032821.2:c.10368C>T(p.=)    |
| HYDIN-16-70913497-G>G/A   | HYDIN   | intron_variant     | 0    | NA  | NM_032821.2:c.10364+11C>T | NM_032821.2 | c.10364+11C>T | NP_116210.2 | NA                             |
| HYDIN-16-70913501-T>T/C   | HYDIN   | intron_variant     | 0    | NA  | NM_032821.2:c.10364+7A>G  | NM_032821.2 | c.10364+7A>G  | NP_116210.2 | NA                             |
| HYDIN-16-70917855-A>A/G   | HYDIN   | missense_variant   | 3315 | L/P | NM_032821.2:c.9944T>C     | NM_032821.2 | c.9944T>C     | NP_116210.2 | NP_116210.2:p.Leu3315Pro       |
| HYDIN-16-70917931-C>C/G   | HYDIN   | missense_variant   | 3290 | A/P | NM_032821.2:c.9868G>C     | NM_032821.2 | c.9868G>C     | NP_116210.2 | NP_116210.2:p.Ala3290Pro       |
| HYDIN-16-70942688-A>A/C   | HYDIN   | missense_variant   | 2693 | I/S | NM_032821.2:c.8078T>G     | NM_032821.2 | c.8078T>G     | NP_116210.2 | NP_116210.2:p.Ile2693Ser       |
| HYDIN-16-70972620-G>G/C   | HYDIN   | missense_variant   | 2297 | R/G | NM_032821.2:c.6889C>G     | NM_032821.2 | c.6889C>G     | NP_116210.2 | NP_116210.2:p.Arg2297Gly       |
| HYDIN-16-70975667-T>T/C   | HYDIN   | missense_variant   | 2241 | Q/R | NM_032821.2:c.6722A>G     | NM_032821.2 | c.6722A>G     | NP_116210.2 | NP_116210.2:p.Gln2241Arg       |
| HYDIN-16-70989299-C>C/T   | HYDIN   | missense_variant   | 2098 | V/M | NM_032821.2:c.6292G>A     | NM_032821.2 | c.6292G>A     | NP_116210.2 | NP_116210.2:p.Val2098Met       |
| HYDIN-16-70989335-G>G/A   | HYDIN   | missense_variant   | 2086 | R/C | NM_032821.2:c.6256C>T     | NM_032821.2 | c.6256C>T     | NP_116210.2 | NP_116210.2:p.Arg2086Cys       |
| HYDIN-16-70993566-A>G/G   | HYDIN   | synonymous_variant | 2041 | H   | NM_032821.2:c.6123T>C     | NM_032821.2 | c.6123T>C     | NP_116210.2 | NM_032821.2:c.6123T>C(p.=)     |
| HYDIN-16-70998808-G>G/A   | HYDIN   | intron_variant     | 0    | NA  | NM_032821.2:c.5617-9C>T   | NM_032821.2 | c.5617-9C>T   | NP_116210.2 | NA                             |
| HYDIN-16-71007354-G>G/A   | HYDIN   | synonymous_variant | 1756 | R   | NM_032821.2:c.5268C>T     | NM_032821.2 | c.5268C>T     | NP_116210.2 | NM_032821.2:c.5268C>T(p.=)     |
| HYDIN-16-71008169-T>T/C   | HYDIN   | synonymous_variant | 1647 | L   | NM_032821.2:c.4941A>G     | NM_032821.2 | c.4941A>G     | NP_116210.2 | NM_032821.2:c.4941A>G(p.=)     |
| HYDIN-16-71012855-T>T/C   | HYDIN   | missense_variant   | 1533 | I/V | NM_032821.2:c.4597A>G     | NM_032821.2 | c.4597A>G     | NP_116210.2 | NP_116210.2:p.Ile1533Val       |
| HYDIN-16-71015290-C>C/G   | HYDIN   | intron_variant     | 0    | NA  | NM_032821.2:c.4507+4G>C   | NM_032821.2 | c.4507+4G>C   | NP_116210.2 | NA                             |
| HYDIN-16-71015482-G>G/A   | HYDIN   | intron_variant     | 0    | NA  | NM_032821.2:c.4330-11C>T  | NM_032821.2 | c.4330-11C>T  | NP_116210.2 | NA                             |
| HYDIN-16-71026076-C>C/G   | HYDIN   | missense_variant   | 1228 | V/L | NM_032821.2:c.3682G>C     | NM_032821.2 | c.3682G>C     | NP_116210.2 | NP_116210.2:p.Val1228Leu       |
| HYDIN-16-71026098-C>C/T   | HYDIN   | synonymous_variant | 1220 | P   | NM_032821.2:c.3660G>A     | NM_032821.2 | c.3660G>A     | NP_116210.2 | NM_032821.2:c.3660G>A(p.=)     |
| HYDIN-16-71054178-T>T/C   | HYDIN   | missense_variant   | 1077 | I/V | NM_032821.2:c.3229A>G     | NM_032821.2 | c.3229A>G     | NP_116210.2 | NP_116210.2:p.Ile1077Val       |
| HYDIN-16-71061495-A>A/G   | HYDIN   | intron_variant     | 0    | NA  | NM_032821.2:c.3042+10T>C  | NM_032821.2 | c.3042+10T>C  | NP_116210.2 | NA                             |
| HYDIN-16-71061529-G>G/A   | HYDIN   | synonymous_variant | 1006 | L   | NM_032821.2:c.3018C>T     | NM_032821.2 | c.3018C>T     | NP_116210.2 | NM_032821.2:c.3018C>T(p.=)     |
| HYDIN-16-71098649-T>T/C   | HYDIN   | missense_variant   | 724  | N/D | NM_032821.2:c.2170A>G     | NM_032821.2 | c.2170A>G     | NP_116210.2 | NP_116210.2:p.Asn724Asp        |
| HYDIN-16-71101200-T>T/C   | HYDIN   | missense_variant   | 690  | T/A | NM_032821.2:c.2068A>G     | NM_032821.2 | c.2068A>G     | NP_116210.2 | NP_116210.2:p.Thr690Ala        |
| HYDIN-16-71101270-C>C/T   | HYDIN   | synonymous_variant | 666  | V   | NM_032821.2:c.1998G>A     | NM_032821.2 | c.1998G>A     | NP_116210.2 | NM_032821.2:c.1998G>A(p.=)     |
| HYDIN-16-71103269-T>T/C   | HYDIN   | synonymous_variant | 625  | P   | NM_032821.2:c.1875A>G     | NM_032821.2 | c.1875A>G     | NP_116210.2 | NM_032821.2:c.1875A>G(p.=)     |
| HYDIN-16-71122408-C>C/T   | HYDIN   | missense_variant   | 489  | G/D | NM_032821.2:c.1466G>A     | NM_032821.2 | c.1466G>A     | NP_116210.2 | NP_116210.2:p.Gly489Asp        |
| HYDIN-16-71209556-C>C/T   | HYDIN   | missense_variant   | 157  | G/E | NM_032821.2:c.470G>A      | NM_032821.2 | c.470G>A      | NP_116210.2 | NP_116210.2:p.Gly157Glu        |
| PHLPP2-16-71683759-G>G/A  | PHLPP2  | synonymous_variant | 1002 | H   | NM_015020.2:c.3006C>T     | NM_015020.2 | c.3006C>T     | NP_055835.2 | NM_015020.2:c.3006C>T(p.=)     |

|                                                                             |                  |                                       |      |       |                                                     |                            |                                |                            |                                      |
|-----------------------------------------------------------------------------|------------------|---------------------------------------|------|-------|-----------------------------------------------------|----------------------------|--------------------------------|----------------------------|--------------------------------------|
| ZFH3-16-72923700-C>C/T<br>PSMD7-16-74339608-<br>GAGGAGAAAA>GAGGAGAAAA/<br>G | ZFH3             | synonymous_variant                    | 1126 | K     | NM_006885.3:c.3378G>A                               | NM_006885.3                | c.3378G>A                      | NP_008816.3                | NM_006885.3:c.3378G>A(p.=)           |
|                                                                             | PSMD7<br>ADAMTS1 | inframe                               | NA   | EKK/E | NM_002811.4:c.953_961delAGG<br>AGAAAA               | NM_002811.4                | c.953_961delAGGAGAAAA          | NP_002802.2                | NP_002802.2:p.Glu319_Lys321del       |
| ADAMTS18-16-77398091-C>C/T<br>MAF-16-79633805-<br>TGCC>TGCC/T               | ADAMTS1<br>8     | missense_variant                      | 322  | M/I   | NM_199355.2:c.966G>A                                | NM_199355.2                | c.966G>A                       | NP_955387.1                | NP_955387.1:p.Met322Ile              |
| MLYCD-16-83940707-A>A/C                                                     | MAF<br>MLYCD     | 5_prime_UTR_variant<br>intron_variant | 0    | NA    | NM_005360.4:c.-9_-7delGGC<br>NM_012213.2:c.641+3A>C | NM_005360.4<br>NM_012213.2 | c.-9_-7delGGC<br>c.641+3A>C    | NP_005351.2<br>NP_036345.2 | NA<br>NA                             |
| GSE1-16-85690000-<br>CGAGCGT>CGAGCGT/C                                      | GSE1             | inframe                               | NA   | ER/-  | NM_014615.2:c.1042_1047delGA<br>GCGT                | NM_014615.2                | c.1042_1047delGAGCGT           | NP_055430.1                | NP_055430.1:p.Glu348_Arg349delinsdel |
| GSE1-16-85696615-C>C/T                                                      | GSE1             | synonymous_variant                    | 763  | Y     | NM_014615.2:c.2289C>T                               | NM_014615.2                | c.2289C>T                      | NP_055430.1                | NM_014615.2:c.2289C>T(p.=)           |
| APRT-16-88877983-G>G/A                                                      | APRT             | synonymous_variant                    | 54   | H     | NM_000485.2:c.162C>T                                | NM_000485.2                | c.162C>T                       | NP_000476.1                | NM_000485.2:c.162C>T(p.=)            |
| ACSF3-16-89220973-<br>C>CAAAT/CAAAT                                         | ACSF3            | 3_prime_UTR_variant                   | 0    | NA    | NM_001243279.1:c.*358_*359ins<br>AAAT               | NM_001243279.1             | c.*358_*359insAAAT             | NP_001230208.1             | NA                                   |
| PRPF8-17-1582082-G>G/A                                                      | PRPF8            | missense_variant                      | 565  | R/W   | NM_006445.3:c.1693C>T                               | NM_006445.3                | c.1693C>T                      | NP_006436.3                | NP_006436.3:p.Arg565Trp              |
| SERPINF2-17-1657575-C>C/T                                                   | SERPINF2         | missense_variant                      | 408  | S/F   | NM_000934.3:c.1223C>T                               | NM_000934.3                | c.1223C>T                      | NP_000925.2                | NP_000925.2:p.Ser408Phe              |
| GP1BA-17-4837220-T>T/C                                                      | GP1BA            | missense_variant                      | 441  | S/P   | NM_000173.5:c.1321T>C                               | NM_000173.5                | c.1321T>C                      | NP_000164.5                | NP_000164.5:p.Ser441Pro              |
| AIPL1-17-6330216-C>C/T                                                      | AIPL1            | synonymous_variant                    | 209  | R     | NM_014336.3:c.627G>A                                | NM_014336.3                | c.627G>A                       | NP_055151.3                | NM_014336.3:c.627G>A(p.=)            |
| CTC1-17-8135249-G>G/A                                                       | CTC1             | missense_variant                      | 786  | P/L   | NM_025099.5:c.2357C>T                               | NM_025099.5                | c.2357C>T                      | NP_079375.3                | NP_079375.3:p.Pro786Leu              |
| PFAS-17-8158983-C>C/T                                                       | PFAS             | missense_variant                      | 183  | A/V   | NM_012393.2:c.548C>T                                | NM_012393.2                | c.548C>T                       | NP_036525.1                | NP_036525.1:p.Ala183Val              |
| DNAH9-17-11648284-C>C/T                                                     | DNAH9            | synonymous_variant                    | 2094 | I     | NM_001372.3:c.6282C>T                               | NM_001372.3                | c.6282C>T                      | NP_001363.2                | NM_001372.3:c.6282C>T(p.=)           |
| SREBF1-17-17719517-T>T/C                                                    | SREBF1           | intron_variant                        | 0    | NA    | NM_001005291.2:c.2304+4A>G                          | NM_001005291.2             | c.2304+4A>G                    | NP_001005291.1             | NA                                   |
| LLGL1-17-18141055-C>C/T                                                     | LLGL1            | synonymous_variant                    | 624  | F     | NM_004140.3:c.1872C>T                               | NM_004140.3                | c.1872C>T                      | NP_004131.3                | NM_004140.3:c.1872C>T(p.=)           |
| LIG3-17-33325276-C>C/T                                                      | LIG3             | synonymous_variant                    | 650  | I     | NM_013975.3:c.1950C>T                               | NM_013975.3                | c.1950C>T                      | NP_039269.2                | NM_013975.3:c.1950C>T(p.=)           |
| TAF15-17-34171583-A>A/G                                                     | TAF15            | missense_variant                      | 427  | Y/C   | NM_139215.2:c.1280A>G                               | NM_139215.2                | c.1280A>G                      | NP_631961.1                | NP_631961.1:p.Tyr427Cys              |
| GPR179-17-36485998-A>A/G                                                    | GPR179           | missense_variant                      | 1152 | S/P   | NM_001004334.2:c.3454T>C                            | NM_001004334.2             | c.3454T>C                      | NP_001004334.2             | NP_001004334.2:p.Ser1152Pro          |
| ERBB2-17-37865659-C>C/T                                                     | ERBB2            | synonymous_variant                    | 176  | N     | NM_004448.2:c.528C>T                                | NM_004448.2                | c.528C>T                       | NP_004439.2                | NM_004448.2:c.528C>T(p.=)            |
| ATP6V0A1-17-40612952-C>C/T                                                  | ATP6V0A1         | stop_gained                           | 14   | Q/*   | NM_001130020.1:c.40C>T                              | NM_001130020.1             | c.40C>T                        | NP_001123492.1             | NP_001123492.1:p.Gln14Ter            |
| ABCC3-17-48753045-G>G/A                                                     | ABCC3            | missense_variant                      | 923  | R/Q   | NM_003786.3:c.2768G>A                               | NM_003786.3                | c.2768G>A                      | NP_003777.2                | NP_003777.2:p.Arg923Gln              |
| MPO-17-56350226-G>G/A                                                       | MPO              | missense_variant                      | 559  | R/C   | NM_000250.1:c.1675C>T                               | NM_000250.1                | c.1675C>T                      | NP_000241.1                | NP_000241.1:p.Arg559Cys              |
| RPS6KB1-17-57992034-G>G/A                                                   | RPS6KB1          | synonymous_variant                    | 117  | G     | NM_003161.2:c.351G>A                                | NM_003161.2                | c.351G>A                       | NP_003152.1                | NM_003161.2:c.351G>A(p.=)            |
| PPM1D-17-58677903-G>G/A                                                     | PPM1D            | missense_variant                      | 43   | R/Q   | NM_003620.3:c.128G>A                                | NM_003620.3                | c.128G>A                       | NP_003611.1                | NP_003611.1:p.Arg43Gln               |
| CD79B-17-62009606-A>A/T                                                     | CD79B            | missense_variant                      | 6    | L/M   | NM_001039933.1:c.16T>A                              | NM_001039933.1             | c.16T>A                        | NP_001035022.1             | NP_001035022.1:p.Leu6Met             |
| FAM20A-17-66596441-G>G/A                                                    | FAM20A           | synonymous_variant                    | 123  | L     | NM_017565.3:c.367C>T                                | NM_017565.3                | c.367C>T                       | NP_060035.2                | NM_017565.3:c.367C>T(p.=)            |
| TMC6-17-76116917-C>C/T                                                      | TMC6             | intron_variant                        | 0    | NA    | NM_007267.6:c.1536-4G>A                             | NM_007267.6                | c.1536-4G>A                    | NP_009198.4                | NA                                   |
| RNF213-17-78282833-C>C/T                                                    | RNF213           | synonymous_variant                    | 839  | A     | NM_001256071.1:c.2517C>T                            | NM_001256071.1             | c.2517C>T                      | NP_001243000.1             | NM_001256071.1:c.2517C>T(p.=)        |
| WDR45B-17-80606200-C>C/T                                                    | WDR45B           | missense_variant                      | 6    | C/Y   | NM_019613.3:c.17G>A                                 | NM_019613.3                | c.17G>A                        | NP_062559.2                | NP_062559.2:p.Cys6Tyr                |
| CIDEA-18-12274200-G>G/A                                                     | CIDEA            | missense_variant                      | 147  | V/M   | NM_001279.3:c.439G>A                                | NM_001279.3                | c.439G>A                       | NP_001270.1                | NP_001270.1:p.Val147Met              |
| NPC1-18-21124914-C>C/G                                                      | NPC1             | intron_variant                        | 0    | NA    | NM_000271.4:c.1947+10G>C                            | NM_000271.4                | c.1947+10G>C                   | NP_000262.2                | NA                                   |
| SETBP1-18-42456670-<br>C>C/CTCTT                                            | SETBP1           | intron_variant                        | 0    | NA    | NM_015559.2:c.540+7422_540+7<br>423insTCTT          | NM_015559.2                | c.540+7422_540+7423insTC<br>TT | NP_056374.2                | NA                                   |
| SETBP1-18-42531303-C>C/T                                                    | SETBP1           | synonymous_variant                    | 666  | I     | NM_015559.2:c.1998C>T                               | NM_015559.2                | c.1998C>T                      | NP_056374.2                | NM_015559.2:c.1998C>T(p.=)           |
| MYO5B-18-47379818-C>C/T                                                     | MYO5B            | splice_variant                        | 0    | NA    | NM_001080467.2:c.4221+1G>A                          | NM_001080467.2             | c.4221+1G>A                    | NP_001073936.1             | NA                                   |
| MYO5B-18-47421410-C>C/T                                                     | MYO5B            | synonymous_variant                    | 982  | Q     | NM_001080467.2:c.2946G>A                            | NM_001080467.2             | c.2946G>A                      | NP_001073936.1             | NM_001080467.2:c.2946G>A(p.=)        |
| SERPINB5-18-61170790-A>A/G                                                  | SERPINB5         | synonymous_variant                    | 321  | K     | NM_002639.4:c.963A>G                                | NM_002639.4                | c.963A>G                       | NP_002630.2                | NM_002639.4:c.963A>G(p.=)            |

|                            |          |                    |      |      |                                |                |                 |                |                                     |
|----------------------------|----------|--------------------|------|------|--------------------------------|----------------|-----------------|----------------|-------------------------------------|
| STK11-19-1221211-G>G/A     | STK11    | splice_variant     | 0    | NA   | NM_000455.4:c.735-1G>A         | NM_000455.4    | c.735-1G>A      | NP_000446.1    | NA                                  |
| ICAM1-19-10385601-G>G/A    | ICAM1    | synonymous_variant | 76   | R    | NM_000201.2:c.228G>A           | NM_000201.2    | c.228G>A        | NP_000192.2    | NM_000201.2:c.228G>A(p.=)           |
| TYK2-19-10464843-G>G/A     | TYK2     | missense_variant   | 928  | A/V  | NM_003331.4:c.2783C>T          | NM_003331.4    | c.2783C>T       | NP_003322.3    | NP_003322.3:p.Ala928Val             |
| CYP4F2-19-15989696-G>G/C   | CYP4F2   | missense_variant   | 483  | A/G  | NM_001082.3:c.1448C>G          | NM_001082.3    | c.1448C>G       | NP_001073.3    | NP_001073.3:p.Ala483Gly             |
| CYP4F2-19-15989730-T>T/C   | CYP4F2   | missense_variant   | 472  | T/A  | NM_001082.3:c.1414A>G          | NM_001082.3    | c.1414A>G       | NP_001073.3    | NP_001073.3:p.Thr472Ala             |
| GPI-19-34855843-T>T/C      | GPI      | missense_variant   | 10   | L/P  | NM_001184722.1:c.29T>C         | NM_001184722.1 | c.29T>C         | NP_001171651.1 | NP_001171651.1:p.Leu10Pro           |
| COX7A1-19-36642562-A>A/C   | COX7A1   | intron_variant     | 0    | NA   | NM_001864.2:c.102+9T>G         | NM_001864.2    | c.102+9T>G      | NP_001855.1    | NA                                  |
| LTBP4-19-41123093-A>AG/AG  | LTBP4    | frameshift_variant | 1078 | NA   | NM_001042544.1:c.3233_3234insG | NM_001042544.1 | c.3233_3234insG | NP_001036009.1 | NP_001036009.1:p.Val1079GlyfsTer547 |
| CD177-19-43860192-T>G/G    | CD177    | missense_variant   | 184  | V/G  | NM_020406.2:c.551T>G           | NM_020406.2    | c.551T>G        | NP_065139.2    | NP_065139.2:p.Val184Gly             |
| CD177-19-43865692-G>G/A    | CD177    | missense_variant   | 348  | A/T  | NM_020406.2:c.1042G>A          | NM_020406.2    | c.1042G>A       | NP_065139.2    | NP_065139.2:p.Ala348Thr             |
| FKRP-19-47258956-C>C/T     | FKRP     | synonymous_variant | 83   | A    | NM_001039885.2:c.249C>T        | NM_001039885.2 | c.249C>T        | NP_001034974.1 | NM_001039885.2:c.249C>T(p.=)        |
| LHB-19-49519883-A>A/G      | LHB      | missense_variant   | 35   | I/T  | NM_000894.2:c.104T>C           | NM_000894.2    | c.104T>C        | NP_000885.1    | NP_000885.1:p.Ile35Thr              |
| HRC-19-49657889-T>T/TTCC   | HRC      | inframe            | 202  | E/EE | NM_002152.2:c.603_605dupGGA    | NM_002152.2    | c.603_605dupGGA | NP_002143.1    | NP_002143.1:p.Glu201dup             |
| CLEC11A-19-51228591-C>C/T  | CLEC11A  | missense_variant   | 280  | P/L  | NM_002975.2:c.839C>T           | NM_002975.2    | c.839C>T        | NP_002966.1    | NP_002966.1:p.Pro280Leu             |
| SIGLEC12-19-51995034-G>G/A | SIGLEC12 | missense_variant   | 550  | P/L  | NM_053003.2:c.1649C>T          | NM_053003.2    | c.1649C>T       | NP_443729.1    | NP_443729.1:p.Pro550Leu             |
| SIGLEC12-19-52004795-G>G/T | SIGLEC12 | synonymous_variant | 65   | R    | NM_053003.2:c.193C>A           | NM_053003.2    | c.193C>A        | NP_443729.1    | NM_053003.2:c.193C>A(p.=)           |
| KIR2DL3-19-55250036-T>T/C  | KIR2DL3  | missense_variant   | 9    | V/A  | NM_015868.2:c.26T>C            | NM_015868.2    | c.26T>C         | NP_056952.2    | NP_056952.2:p.Val9Ala               |
| KIR2DL3-19-55250979-C>C/A  | KIR2DL3  | missense_variant   | 21   | P/T  | NM_015868.2:c.61C>A            | NM_015868.2    | c.61C>A         | NP_056952.2    | NP_056952.2:p.Pro21Thr              |
| KIR2DL3-19-55253465-C>C/G  | KIR2DL3  | missense_variant   | 37   | P/R  | NM_015868.2:c.110C>G           | NM_015868.2    | c.110C>G        | NP_056952.2    | NP_056952.2:p.Pro37Arg              |
| KIR2DL3-19-55253521-C>C/G  | KIR2DL3  | missense_variant   | 56   | Q/E  | NM_015868.2:c.166C>G           | NM_015868.2    | c.166C>G        | NP_056952.2    | NP_056952.2:p.Gln56Glu              |
| KIR2DL3-19-55253544-A>A/G  | KIR2DL3  | synonymous_variant | 63   | E    | NM_015868.2:c.189A>G           | NM_015868.2    | c.189A>G        | NP_056952.2    | NM_015868.2:c.189A>G(p.=)           |
| KIR2DL3-19-55253601-G>G/A  | KIR2DL3  | synonymous_variant | 82   | K    | NM_015868.2:c.246G>A           | NM_015868.2    | c.246G>A        | NP_056952.2    | NM_015868.2:c.246G>A(p.=)           |
| KIR2DL3-19-55258830-C>C/T  | KIR2DL3  | synonymous_variant | 236  | S    | NM_015868.2:c.708C>T           | NM_015868.2    | c.708C>T        | NP_056952.2    | NM_015868.2:c.708C>T(p.=)           |
| KIR2DL3-19-55258831-G>G/A  | KIR2DL3  | missense_variant   | 237  | E/K  | NM_015868.2:c.709G>A           | NM_015868.2    | c.709G>A        | NP_056952.2    | NP_056952.2:p.Glu237Lys             |
| KIR2DL1-19-55284787-G>G/T  | KIR2DL1  | missense_variant   | 25   | V/F  | NM_014218.2:c.73G>T            | NM_014218.2    | c.73G>T         | NP_055033.2    | NP_055033.2:p.Val111Leu             |
| KIR2DL1-19-55284791-A>A/G  | KIR2DL1  | missense_variant   | 26   | H/R  | NM_014218.2:c.77A>G            | NM_014218.2    | c.77A>G         | NP_055033.2    | NP_055033.2:p.His26Arg              |
| KIR2DL1-19-55284858-G>G/A  | KIR2DL1  | synonymous_variant | 48   | Q    | NM_014218.2:c.144G>A           | NM_014218.2    | c.144G>A        | NP_055033.2    | NM_014218.2:c.144G>A(p.=)           |
| KIR2DL1-19-55284882-A>A/G  | KIR2DL1  | synonymous_variant | 56   | E    | NM_014218.2:c.168A>G           | NM_014218.2    | c.168A>G        | NP_055033.2    | NM_014218.2:c.168A>G(p.=)           |
| KIR2DL1-19-55285045-G>G/T  | KIR2DL1  | missense_variant   | 111  | V/L  | NM_014218.2:c.331G>T           | NM_014218.2    | c.331G>T        | NP_055033.2    | NP_055033.2:p.Val111Leu             |
| KIR2DL1-19-55286769-C>C/A  | KIR2DL1  | missense_variant   | 175  | P/T  | NM_014218.2:c.523C>A           | NM_014218.2    | c.523C>A        | NP_055033.2    | NP_055033.2:p.Pro175Thr             |
| KIR2DL1-19-55286796-G>G/A  | KIR2DL1  | missense_variant   | 184  | D/N  | NM_014218.2:c.550G>A           | NM_014218.2    | c.550G>A        | NP_055033.2    | NP_055033.2:p.Asp184Asn             |
| KIR2DL1-19-55286822-C>C/T  | KIR2DL1  | synonymous_variant | 192  | H    | NM_014218.2:c.576C>T           | NM_014218.2    | c.576C>T        | NP_055033.2    | NM_014218.2:c.576C>T(p.=)           |
| KIR2DL1-19-55286828-G>G/A  | KIR2DL1  | synonymous_variant | 194  | G    | NM_014218.2:c.582G>A           | NM_014218.2    | c.582G>A        | NP_055033.2    | NM_014218.2:c.582G>A(p.=)           |
| KIR2DL1-19-55286854-A>A/G  | KIR2DL1  | missense_variant   | 203  | H/R  | NM_014218.2:c.608A>G           | NM_014218.2    | c.608A>G        | NP_055033.2    | NP_055033.2:p.His203Arg             |
| KIR2DL1-19-55286864-A>A/C  | KIR2DL1  | synonymous_variant | 206  | P    | NM_014218.2:c.618A>C           | NM_014218.2    | c.618A>C        | NP_055033.2    | NM_014218.2:c.618A>C(p.=)           |
| KIR2DL1-19-55294454-C>C/T  | KIR2DL1  | missense_variant   | 266  | R/C  | NM_014218.2:c.796C>T           | NM_014218.2    | c.796C>T        | NP_055033.2    | NP_055033.2:p.Arg266Cys             |
| KIR2DL1-19-55294484-T>C/C  | KIR2DL1  | intron_variant     | 0    | NA   | NM_014218.2:c.817+9T>C         | NM_014218.2    | c.817+9T>C      | NP_055033.2    | NA                                  |
| KIR2DL1-19-55294931-T>T/C  | KIR2DL1  | intron_variant     | 0    | NA   | NM_014218.2:c.818-7T>C         | NM_014218.2    | c.818-7T>C      | NP_055033.2    | NA                                  |
| KIR2DL1-19-55294969-A>A/G  | KIR2DL1  | synonymous_variant | 283  | G    | NM_014218.2:c.849A>G           | NM_014218.2    | c.849A>G        | NP_055033.2    | NM_014218.2:c.849A>G(p.=)           |
| KIR2DL1-19-55295215-A>A/G  | KIR2DL1  | missense_variant   | 333  | T/A  | NM_014218.2:c.997A>G           | NM_014218.2    | c.997A>G        | NP_055033.2    | NP_055033.2:p.Thr333Ala             |
| KIR2DL4-19-55316329-A>A/G  | KIR2DL4  | missense_variant   | 53   | Y/C  | NM_001080770.1:c.158A>G        | NM_001080770.1 | c.158A>G        | NP_001074239.1 | NP_001074239.1:p.Tyr53Cys           |
| KIR2DL4-19-55317524-G>G/A  | KIR2DL4  | synonymous_variant | 160  | E    | NM_001080770.1:c.480G>A        | NM_001080770.1 | c.480G>A        | NP_001074239.1 | NM_001080770.1:c.480G>A(p.=)        |
| KIR2DL4-19-55320279-G>A/A  | KIR2DL4  | intron_variant     | 0    | NA   | NM_001080770.1:c.656-9G>A      | NM_001080770.1 | c.656-9G>A      | NP_001074239.1 | NA                                  |
| KIR3DL1-19-55327960-C>C/T  | KIR3DL1  | missense_variant   | 2    | S/L  | NM_013289.2:c.5C>T             | NM_013289.2    | c.5C>T          | NP_037421.2    | NP_037421.2:p.Ser2Leu               |
| KIR3DL1-19-55329783-A>A/G  | KIR3DL1  | synonymous_variant | 28   | K    | NM_013289.2:c.84A>G            | NM_013289.2    | c.84A>G         | NP_037421.2    | NM_013289.2:c.84A>G(p.=)            |
| KIR3DL1-19-55329822-A>A/C  | KIR3DL1  | synonymous_variant | 41   | R    | NM_013289.2:c.123A>C           | NM_013289.2    | c.123A>C        | NP_037421.2    | NM_013289.2:c.123A>C(p.=)           |

|                                  |         |                     |      |     |                                           |                |                               |                |                                 |
|----------------------------------|---------|---------------------|------|-----|-------------------------------------------|----------------|-------------------------------|----------------|---------------------------------|
| KIR3DL1-19-55329901-A>A/G        | KIR3DL1 | missense_variant    | 68   | I/V | NM_013289.2:c.202A>G                      | NM_013289.2    | c.202A>G                      | NP_037421.2    | NP_037421.2:p.Ile68Val          |
| KIR3DL1-19-55329934-A>A/G        | KIR3DL1 | missense_variant    | 79   | S/G | NM_013289.2:c.235A>G                      | NM_013289.2    | c.235A>G                      | NP_037421.2    | NP_037421.2:p.Ser79Gly          |
| KIR3DL1-19-55330036-G>G/A        | KIR3DL1 | missense_variant    | 113  | V/M | NM_013289.2:c.337G>A                      | NM_013289.2    | c.337G>A                      | NP_037421.2    | NP_037421.2:p.Val113Met         |
| KIR3DL1-19-55333023-C>C/T        | KIR3DL1 | missense_variant    | 220  | P/L | NM_013289.2:c.659C>T                      | NM_013289.2    | c.659C>T                      | NP_037421.2    | NP_037421.2:p.Pro220Leu         |
| KIR3DL1-19-55333246-C>C/T        | KIR3DL1 | synonymous_variant  | 294  | F   | NM_013289.2:c.882C>T                      | NM_013289.2    | c.882C>T                      | NP_037421.2    | NM_013289.2:c.882C>T(p.=)       |
| KIR3DL1-19-55333275-G>G/T        | KIR3DL1 | missense_variant    | 304  | W/L | NM_013289.2:c.911G>T                      | NM_013289.2    | c.911G>T                      | NP_037421.2    | NP_037421.2:p.Trp304Leu         |
| KIR3DL2-19-55361942-G>G/T        | KIR3DL2 | synonymous_variant  | 4    | T   | NM_006737.3:c.12G>T                       | NM_006737.3    | c.12G>T                       | NP_006728.2    | NM_006737.3:c.12G>T(p.=)        |
| KIR3DL2-19-55363704-G>G/A        | KIR3DL2 | missense_variant    | 108  | A/T | NM_006737.3:c.322G>A                      | NM_006737.3    | c.322G>A                      | NP_006728.2    | NP_006728.2:p.Ala108Thr         |
| FCAR-19-55399537-G>G/A           | FCAR    | synonymous_variant  | 175  | P   | NM_002000.2:c.525G>A                      | NM_002000.2    | c.525G>A                      | NP_001991.1    | NM_002000.2:c.525G>A(p.=)       |
| NLRP7-19-55451116-G>G/A          | NLRP7   | synonymous_variant  | 357  | F   | NM_001127255.1:c.1071C>T                  | NM_001127255.1 | c.1071C>T                     | NP_001120727.1 | NM_001127255.1:c.1071C>T(p.=)   |
| GP6-19-55526249-G>G/A            | GP6     | missense_variant    | 355  | S/L | NM_001083899.1:c.1064C>T                  | NM_001083899.1 | c.1064C>T                     | NP_001077368.1 | NP_001077368.1:p.Ser355Leu      |
| SLC27A5-19-59021378-G>G/A        | SLC27A5 | intron_variant      | 0    | NA  | NM_012254.2:c.899-6C>T                    | NM_012254.2    | c.899-6C>T                    | NP_036386.1    | NA                              |
| RSPO4-20-944659-G>G/T            | RSPO4   | synonymous_variant  | 172  | R   | NM_001029871.3:c.514C>A                   | NM_001029871.3 | c.514C>A                      | NP_001025042.2 | NM_001029871.3:c.514C>A(p.=)    |
| TGM6-20-2411240-C>C/T            | TGM6    | synonymous_variant  | 609  | T   | NM_198994.2:c.1827C>T                     | NM_198994.2    | c.1827C>T                     | NP_945345.2    | NM_198994.2:c.1827C>T(p.=)      |
| MAVS-20-3845296-C>C/T            | MAVS    | missense_variant    | 340  | A/V | NM_020746.4:c.1019C>T                     | NM_020746.4    | c.1019C>T                     | NP_065797.2    | NP_065797.2:p.Ala340Val         |
| PLCB4-20-9457409-G>G/A           | PLCB4   | intron_variant      | 0    | NA  | NM_000933.3:c.3496+9G>A                   | NM_000933.3    | c.3496+9G>A                   | NP_000924.3    | NA                              |
| RPN2-20-35856945-C>C/T           | RPN2    | intron_variant      | 0    | NA  | NM_002951.3:c.1300-8C>T                   | NM_002951.3    | c.1300-8C>T                   | NP_002942.2    | NA                              |
| CHD6-20-40033494-G>G/A           | CHD6    | synonymous_variant  | 2629 | S   | NM_032221.3:c.7887C>T                     | NM_032221.3    | c.7887C>T                     | NP_115597.3    | NM_032221.3:c.7887C>T(p.=)      |
| CHD6-20-40033495-G>G/A           | CHD6    | missense_variant    | 2629 | S/F | NM_032221.3:c.7886C>T                     | NM_032221.3    | c.7886C>T                     | NP_115597.3    | NP_115597.3:p.Ser2629Phe        |
| PTPRT-20-40790158-G>G/A          | PTPRT   | missense_variant    | 858  | S/F | NM_133170.3:c.2573C>T                     | NM_133170.3    | c.2573C>T                     | NP_573400.3    | NP_573400.3:p.Ser858Phe         |
| ADNP-20-49508776-C>C/A           | ADNP    | synonymous_variant  | 825  | G   | NM_015339.2:c.2475G>T                     | NM_015339.2    | c.2475G>T                     | NP_056154.1    | NM_015339.2:c.2475G>T(p.=)      |
| CYP24A1-20-52774674-C>C/T        | CYP24A1 | missense_variant    | 396  | R/Q | NM_000782.4:c.1187G>A                     | NM_000782.4    | c.1187G>A                     | NP_000773.2    | NP_000773.2:p.Arg396Gln         |
| VAPB-20-56964483-C>C/G           | VAPB    | 5_prime_UTR_variant | 0    | NA  | NM_004738.4:c.-33C>G                      | NM_004738.4    | c.-33C>G                      | NP_004729.1    | NA                              |
| GNAS-20-57464277-C>CCGGCG/CCGGCG | GNAS    | intron_variant      | 0    | NA  | NM_080425.2:c.2069-6390_2069-6389insCGGCG | NM_080425.2    | c.2069-6390_2069-6389insCGGCG | NP_536350.2    | NA                              |
| LAMA5-20-60886124-G>G/A          | LAMA5   | missense_variant    | 3372 | P/L | NM_005560.3:c.10115C>T                    | NM_005560.3    | c.10115C>T                    | NP_005551.3    | NP_005551.3:p.Pro3372Leu        |
| LAMA5-20-60902379-G>G/A          | LAMA5   | synonymous_variant  | 1674 | L   | NM_005560.3:c.5022C>T                     | NM_005560.3    | c.5022C>T                     | NP_005551.3    | NM_005560.3:c.5022C>T(p.=)      |
| LAMA5-20-60942256-G>G/A          | LAMA5   | missense_variant    | 16   | P/S | NM_005560.3:c.46C>T                       | NM_005560.3    | c.46C>T                       | NP_005551.3    | NP_005551.3:p.Pro16Ser          |
| TPTE-21-10935004-A>A/T           | TPTE    | intron_variant      | 0    | NA  | NM_199261.2:c.796-7T>A                    | NM_199261.2    | c.796-7T>A                    | NP_954870.2    | NA                              |
| TPTE-21-10942756-G>G/A           | TPTE    | stop_gained         | 229  | R/* | NM_199261.2:c.685C>T                      | NM_199261.2    | c.685C>T                      | NP_954870.2    | NP_954870.2:p.Arg229Ter         |
| TPTE-21-10943003-C>C/T           | TPTE    | missense_variant    | 195  | R/Q | NM_199261.2:c.584G>A                      | NM_199261.2    | c.584G>A                      | NP_954870.2    | NP_954870.2:p.Arg195Gln         |
| TMPRSS1                          | TMPRSS1 |                     |      |     |                                           |                |                               |                |                                 |
| TMPRSS15-21-19642394-G>G/A       | 5       | synonymous_variant  | 984  | F   | NM_002772.2:c.2952C>T                     | NM_002772.2    | c.2952C>T                     | NP_002763.2    | NM_002772.2:c.2952C>T(p.=)      |
| APP-21-27327970-G>G/A            | APP     | missense_variant    | 520  | P/S | NM_000484.3:c.1558C>T                     | NM_000484.3    | c.1558C>T                     | NP_000475.1    | NP_000475.1:p.Pro520Ser         |
| GRIK1-21-31045476-G>G/A          | GRIK1   | missense_variant    | 185  | R/C | NM_000830.3:c.553C>T                      | NM_000830.3    | c.553C>T                      | NP_000821.1    | NP_000821.1:p.Arg185Cys         |
| TRPM2-21-45817705-G>G/A          | TRPM2   | missense_variant    | 670  | D/N | NM_003307.3:c.2008G>A                     | NM_003307.3    | c.2008G>A                     | NP_003298.1    | NP_003298.1:p.Asp670Asn         |
| TRPM2-21-45821681-C>C/T          | TRPM2   | synonymous_variant  | 813  | F   | NM_003307.3:c.2439C>T                     | NM_003307.3    | c.2439C>T                     | NP_003298.1    | NM_003307.3:c.2439C>T(p.=)      |
| COL6A2-21-47533977-G>G/A         | COL6A2  | missense_variant    | 264  | R/H | NM_001849.3:c.791G>A                      | NM_001849.3    | c.791G>A                      | NP_001840.3    | NP_001840.3:p.Arg264His         |
| PCNT-21-47754449-G>G/A           | PCNT    | missense_variant    | 136  | G/S | NM_006031.5:c.406G>A                      | NM_006031.5    | c.406G>A                      | NP_006022.3    | NP_006022.3:p.Gly136Ser         |
| PCNT-21-47754471-G>G/A           | PCNT    | missense_variant    | 143  | R/H | NM_006031.5:c.428G>A                      | NM_006031.5    | c.428G>A                      | NP_006022.3    | NP_006022.3:p.Arg143His         |
| CLTCL1-22-19189003-A>AC/AC       | CLTCL1  | frameshift_variant  | 1201 | NA  | NM_007098.3:c.3601dupG                    | NM_007098.3    | c.3601dupG                    | NP_009029.3    | NP_009029.3:p.Val1201GlyfsTer19 |
| CLTCL1-22-19213835-C>C/T         | CLTCL1  | synonymous_variant  | 618  | E   | NM_007098.3:c.1854G>A                     | NM_007098.3    | c.1854G>A                     | NP_009029.3    | NM_007098.3:c.1854G>A(p.=)      |

|                                                      |                 |                                           |           |         |                                                       |                                  |                          |                                  |                                     |
|------------------------------------------------------|-----------------|-------------------------------------------|-----------|---------|-------------------------------------------------------|----------------------------------|--------------------------|----------------------------------|-------------------------------------|
| TXNRD2-22-19883063-G>G/A<br>COMT-22-19956262-G>GC/GC | TXNRD2<br>COMT  | synonymous_variant<br>3_prime_UTR_variant | 272<br>0  | G<br>NA | NM_006440.3:c.816C>T<br>NM_000754.3:c.*3_*4insC       | NM_006440.3<br>NM_000754.3       | c.816C>T<br>c.*3_*4insC  | NP_006431.2<br>NP_000745.1       | NM_006440.3:c.816C>T(p.=)<br>NA     |
| BCR-22-23651670-G>G/A<br>BCR-22-23651671-G>G/A       | BCR<br>BCR      | synonymous_variant<br>splice_variant      | 1024<br>0 | G<br>NA | NM_004327.3:c.3072G>A<br>NM_004327.3:c.3072+1G>A      | NM_004327.3<br>NM_004327.3       | c.3072G>A<br>c.3072+1G>A | NP_004318.3<br>NP_004318.3       | NM_004327.3:c.3072G>A(p.=)<br>NA    |
| GGT5-22-24616028-G>G/A<br>GGT5-22-24629461-G>G/A     | GGT5<br>GGT5    | synonymous_variant<br>intron_variant      | 558<br>0  | F<br>NA | NM_001099781.1:c.1674C>T<br>NM_001099781.1:c.400+5C>T | NM_001099781.1<br>NM_001099781.1 | c.1674C>T<br>c.400+5C>T  | NP_001093251.1<br>NP_001093251.1 | NM_001099781.1:c.1674C>T(p.=)<br>NA |
| ADORA2A.ADORA2A-AS1-22-<br>24837124-C>C/T            | ADORA2A<br>-AS1 | intron_variant                            | 0         | NA      | NR_028484.1:n.574+836G>A                              | NR_028484.1                      | n.574+836G>A             | NA                               | NA                                  |
| MYO18B-22-26164462-G>G/A                             | MYO18B          | synonymous_variant                        | 193       | G       | NM_032608.5:c.579G>A                                  | NM_032608.5                      | c.579G>A                 | NP_115997.5                      | NM_032608.5:c.579G>A(p.=)           |
| NEFH-22-29885686-C>C/A                               | NEFH            | missense_variant                          | 686       | A/E     | NM_021076.3:c.2057C>A                                 | NM_021076.3                      | c.2057C>A                | NP_066554.2                      | NP_066554.2:p.Ala686Glu             |
| NCF4-22-37261097-C>C/A                               | NCF4            | missense_variant                          | 85        | T/N     | NM_013416.3:c.254C>A                                  | NM_013416.3                      | c.254C>A                 | NP_038202.2                      | NP_038202.2:p.Trh85Asn              |
| TRIOBP-22-38120041-G>G/A                             | TRIOBP          | missense_variant                          | 493       | S/N     | NM_001039141.2:c.1478G>A                              | NM_001039141.2                   | c.1478G>A                | NP_001034230.1                   | NP_001034230.1:p.Ser493Asn          |
| TRIOBP-22-38120503-G>G/A                             | TRIOBP          | missense_variant                          | 647       | S/N     | NM_001039141.2:c.1940G>A                              | NM_001039141.2                   | c.1940G>A                | NP_001034230.1                   | NP_001034230.1:p.Ser647Asn          |
| APOBEC3B-22-39387400-C>C/T                           | APOBEC3<br>B    | missense_variant                          | 263       | P/S     | NM_004900.4:c.787C>T                                  | NM_004900.4                      | c.787C>T                 | NP_004891.4                      | NP_004891.4:p.Pro263Ser             |
| SYNGR1-22-39777822-<br>C>C/CCAA                      | SYNGR1          | inframe                                   | 202       | P/PN    | NM_004711.4:c.605_606insCAA                           | NM_004711.4                      | c.605_606insCAA          | NP_004702.2                      | NP_004702.2:p.Pro202_Thr203insAsn   |
| NDUFA6-22-42482228-T>T/C                             | NDUFA6          | missense_variant                          | 142       | K/E     | NM_002490.3:c.424A>G                                  | NM_002490.3                      | c.424A>G                 | NP_002481.2                      | NP_002481.2:p.Lys142Glu             |
| VCX3A-X-6451778-C>C/T                                | VCX3A           | 3_prime_UTR_variant                       | 0         | NA      | NM_016379.3:c.*8G>A                                   | NM_016379.3                      | c.*8G>A                  | NP_057463.2                      | NA                                  |
| PHKA2-X-18936859-T>C/C                               | PHKA2           | missense_variant                          | 693       | I/V     | NM_000292.2:c.2077A>G                                 | NM_000292.2                      | c.2077A>G                | NP_000283.1                      | NP_000283.1:p.Ile693Val             |
| SYTL5-X-37961637-T>C/C                               | SYTL5           | missense_variant                          | 369       | S/P     | NM_001163334.1:c.1105T>C                              | NM_001163334.1                   | c.1105T>C                | NP_001156806.1                   | NP_001156806.1:p.Ser369Pro          |
| IQSEC2-X-53279792-G>G/A                              | IQSEC2          | missense_variant                          | 656       | P/S     | NM_001111125.2:c.1966C>T                              | NM_001111125.2                   | c.1966C>T                | NP_001104595.1                   | NP_001104595.1:p.Pro656Ser          |
| EDA2R-X-65835841-A>G/G                               | EDA2R           | missense_variant                          | 8         | Y/H     | NM_001242310.1:c.22T>C                                | NM_001242310.1                   | c.22T>C                  | NP_001229239.1                   | NP_001229239.1:p.Tyr8His            |
| TSIX.XIST-X-73042393-T>T/C                           | TSIX.XIST       | nc_exon_variant                           | 0         | NA      | NR_003255.2:n.30354T>C                                | NR_003255.2                      | n.30354T>C               | NA                               | NA                                  |
| ZDHHC15-X-74649010-G>G/A                             | ZDHHC15         | missense_variant                          | 169       | S/F     | NM_144969.2:c.506C>T                                  | NM_144969.2                      | c.506C>T                 | NP_659406.1                      | NP_659406.1:p.Ser169Phe             |
| IRS4-X-107977804-C>T/T                               | IRS4            | missense_variant                          | 591       | G/S     | NM_003604.2:c.1771G>A                                 | NM_003604.2                      | c.1771G>A                | NP_003595.1                      | NP_003595.1:p.Gly591Ser             |
| TRPC5-X-111024424-G>A/A                              | TRPC5           | missense_variant                          | 704       | A/V     | NM_012471.2:c.2111C>T                                 | NM_012471.2                      | c.2111C>T                | NP_036603.1                      | NP_036603.1:p.Ala704Val             |
| GRIA3-X-122318386-A>AG/AG                            | GRIA3           | 5_prime_UTR_variant                       | 0         | NA      | NM_007325.4:c.-2_-1insG                               | NM_007325.4                      | c.-2_-1insG              | NP_015564.4                      | NA                                  |
| GRIA3-X-122538605-G>G/A                              | GRIA3           | missense_variant                          | 447       | G/E     | NM_007325.4:c.1340G>A                                 | NM_007325.4                      | c.1340G>A                | NP_015564.4                      | NP_015564.4:p.Gly447Glu             |
| GRIA3-X-122616676-C>C/A                              | GRIA3           | missense_variant                          | 822       | S/R     | NM_007325.4:c.2466C>A                                 | NM_007325.4                      | c.2466C>A                | NP_015564.4                      | NP_015564.4:p.Ser822Arg             |
| XIAP-X-123047668-G>G/C                               | XIAP            | 3_prime_UTR_variant                       | 0         | NA      | NM_001204401.1:c.*6637G>C                             | NM_001204401.1                   | c.*6637G>C               | NP_001191330.1                   | NA                                  |
| XIAP-X-123047728-T>T/C                               | XIAP            | 3_prime_UTR_variant                       | 0         | NA      | NM_001204401.1:c.*6697T>C                             | NM_001204401.1                   | c.*6697T>C               | NP_001191330.1                   | NA                                  |
| SLC6A8-X-152954025-A>G/G                             | SLC6A8          | 5_prime_UTR_variant                       | 0         | NA      | NM_005629.3:c.-5A>G                                   | NM_005629.3                      | c.-5A>G                  | NP_005620.1                      | NA                                  |

**Table S4**

| Gene     | Chr | Position  | HGVS <sub>c</sub> nomenclature | Consequence        | Allele Frequency |      |      |       |        |
|----------|-----|-----------|--------------------------------|--------------------|------------------|------|------|-------|--------|
|          |     |           |                                |                    | PR               | P9   | P60  | Mean  | St.Dev |
| EDA2R    | X   | 65835841  | NM_001242310.1:c.22T>C         | missense_variant   | 100              | 100  | 100  | 100.0 | 0.0    |
| HLA-DQB1 | 6   | 32632781  | NM_001243961.1:c.173T>A        | missense_variant   | 100              | 100  | 100  | 100.0 | 0.0    |
| IRS4     | X   | 107977804 | NM_003604.2:c.1771G>A          | missense_variant   | 100              | 100  | 100  | 100.0 | 0.0    |
| PHKA2    | X   | 18936859  | NM_000292.2:c.2077A>G          | missense_variant   | 100              | 100  | 100  | 100.0 | 0.0    |
| TMEM216  | 11  | 61165741  | NM_001173991.2:c.440G>C        | missense_variant   | 100              | 100  | 100  | 100.0 | 0.0    |
| TRPC5    | X   | 111024424 | NM_012471.2:c.2111C>T          | missense_variant   | 100              | 100  | 100  | 100.0 | 0.0    |
| UNC93B1  | 11  | 67765163  | NM_030930.2:c.887dupC          | frameshift_variant | 100              | 100  | 100  | 100.0 | 0.0    |
| PCNT     | 21  | 47754449  | NM_006031.5:c.406G>A           | missense_variant   | 26.4             | 25.6 | 25.9 | 26.0  | 0.4    |
| ZNF804A  | 2   | 185801756 | NM_194250.1:c.1633G>A          | missense_variant   | 30.4             | 29.8 | 30.8 | 30.3  | 0.5    |
| PRB3     | 12  | 11420333  | NM_006249.4:c.723delC          | frameshift_variant | 89.1             | 90   | 89.1 | 89.4  | 0.5    |
| ATR      | 3   | 142274770 | NM_001184.3:c.2290A>G          | missense_variant   | 49.2             | 49.3 | 48.3 | 48.9  | 0.6    |
| TPRN     | 9   | 140093903 | NM_001128228.2:c.1261C>T       | missense_variant   | 52.9             | 52.6 | 53.7 | 53.1  | 0.6    |
| NEFH     | 22  | 29885686  | NM_021076.3:c.2057C>A          | missense_variant   | 23               | 22.5 | 21.8 | 22.4  | 0.6    |
| NCF1     | 7   | 74193668  | NM_000265.4:c.295G>A           | missense_variant   | 100              | 98.7 | 100  | 99.6  | 0.8    |
| ANXA11   | 10  | 81926659  | NM_001157.2:c.731C>T           | missense_variant   | 62.9             | 61.6 | 61.5 | 62.0  | 0.8    |
| LTBP4    | 19  | 41123093  | NM_001042544.1:c.3233_3234insG | frameshift_variant | 99.3             | 97.5 | 98.5 | 98.4  | 0.9    |
| EMG1     | 12  | 7080210   | NM_006331.7:c.124_125insG      | frameshift_variant | 99.5             | 97.7 | 98.9 | 98.7  | 0.9    |
| SCARB1   | 12  | 125299559 | NM_005505.4:c.386C>T           | missense_variant   | 57.3             | 55.4 | 56.3 | 56.3  | 1.0    |
| HLA-DQB1 | 6   | 33052736  | NM_002121.5:c.374G>A           | missense_variant   | 100              | 98.8 | 98   | 98.9  | 1.0    |
| APOB     | 2   | 21260123  | NM_000384.2:c.542C>T           | missense_variant   | 27.3             | 28.1 | 29.4 | 28.3  | 1.1    |
| DNASE1L3 | 3   | 58196522  | NM_004944.3:c.112G>C           | missense_variant   | 51.4             | 49   | 50.7 | 50.4  | 1.2    |
| ZFHX4    | 8   | 77764310  | NM_024721.4:c.5153T>C          | missense_variant   | 51.1             | 49.7 | 48.4 | 49.7  | 1.4    |
| TAF2     | 8   | 120816184 | NM_003184.3:c.494G>A           | missense_variant   | 41.3             | 44.8 | 44.6 | 43.6  | 2.0    |
| RANBP2   | 2   | 109383674 | NM_006267.4:c.6679T>C          | missense_variant   | 38.6             | 35.4 | 34.8 | 36.3  | 2.0    |
| ABHD5    | 3   | 43743914  | NM_016006.4:c.341G>T           | missense_variant   | 51.2             | 49.3 | 53.4 | 51.3  | 2.1    |
| MYO7B    | 2   | 128351149 | NM_001080527.1:c.2174T>G       | missense_variant   | 70               | 69.4 | 73.3 | 70.9  | 2.1    |
| MMP12    | 11  | 102738793 | NM_002426.4:c.631dupA          | frameshift_variant | 96               | 100  | 100  | 98.7  | 2.3    |
| PCNT     | 21  | 47754471  | NM_006031.5:c.428G>A           | missense_variant   | 30.3             | 30.9 | 26.1 | 29.1  | 2.6    |



|            |    |           |                        |                    |      |      |      |      |     |
|------------|----|-----------|------------------------|--------------------|------|------|------|------|-----|
| TOPBP1     | 3  | 133320222 | NM_007027.3:c.4441G>A  | missense_variant   | 47.3 | 52.7 | 49.4 | 49.8 | 2.7 |
| FRG1       | 4  | 190883026 | NM_004477.2:c.679G>T   | missense_variant   | 25   | 21.5 | 27.3 | 24.6 | 2.9 |
| AKAP13     | 15 | 86265465  | NM_006738.4:c.6395A>T  | missense_variant   | 50   | 45.5 | 51.2 | 48.9 | 3.0 |
| KIR2DL3    | 19 | 55250979  | NM_015868.2:c.61C>A    | missense_variant   | 28.2 | 25.6 | 22.2 | 25.3 | 3.0 |
| TPTE       | 21 | 10943003  | NM_199261.2:c.584G>A   | missense_variant   | 29.2 | 30.9 | 35.2 | 31.8 | 3.1 |
| SRGAP2     | 1  | 206566904 | NM_015326.2:c.448T>C   | missense_variant   | 36.4 | 42.5 | 41.1 | 40.0 | 3.2 |
| FMN2       | 1  | 240370907 | NM_020066.4:c.2795T>C  | missense_variant   | 42.9 | 46.2 | 39.5 | 42.9 | 3.4 |
| HYDIN      | 16 | 71122408  | NM_032821.2:c.1466G>A  | missense_variant   | 38.1 | 42.9 | 44.6 | 41.9 | 3.4 |
| GTF2IRD2   | 7  | 74212036  | NM_173537.2:c.1815G>C  | missense_variant   | 42.2 | 48.6 | 43.2 | 44.7 | 3.4 |
| PEX19      | 1  | 160254899 | NM_002857.3:c.16G>A    | missense_variant   | 42.2 | 46.2 | 39.3 | 42.6 | 3.5 |
| TSC2       | 16 | 2134508   | NM_000548.3:c.4285G>T  | missense_variant   | 54.5 | 48.1 | 53.6 | 52.1 | 3.5 |
| CLTCL1     | 22 | 19189003  | NM_007098.3:c.3601dupG | frameshift_variant | 91.3 | 93.9 | 98.6 | 94.6 | 3.7 |
| NINJ1      | 9  | 95888872  | NM_004148.3:c.124G>A   | missense_variant   | 49.7 | 53.7 | 45.9 | 49.8 | 3.9 |
| PMS2       | 7  | 6036969   | NM_000535.5:c.791A>G   | missense_variant   | 35   | 42.7 | 37.5 | 38.4 | 3.9 |
| KIR2DL3    | 19 | 55250036  | NM_015868.2:c.26T>C    | missense_variant   | 62.2 | 62.2 | 55.3 | 59.9 | 4.0 |
| HLA-A      | 6  | 29912856  | NM_002116.7:c.1033A>T  | missense_variant   | 43.2 | 49.3 | 51   | 47.8 | 4.1 |
| COL7A1     | 3  | 48618079  | NM_000094.3:c.4987C>A  | missense_variant   | 52.7 | 54.6 | 60.7 | 56.0 | 4.2 |
| ACSM3.ERI2 | 16 | 20792417  | NM_005622.3:c.904C>T   | missense_variant   | 48.1 | 52.8 | 44.4 | 48.4 | 4.2 |
| KIR3DL1    | 19 | 55327960  | NM_013289.2:c.5C>T     | missense_variant   | 42   | 34   | 40.9 | 39.0 | 4.3 |
| NPSR1      | 7  | 34818119  | NM_207173.1:c.326G>A   | missense_variant   | 42   | 45.3 | 50.7 | 46.0 | 4.4 |
| JAG2       | 14 | 105609822 | NM_002226.4:c.3238A>G  | missense_variant   | 30.2 | 36.6 | 38.9 | 35.2 | 4.5 |
| HYDIN      | 16 | 70917931  | NM_032821.2:c.9868G>C  | missense_variant   | 51.1 | 43.6 | 42.9 | 45.9 | 4.5 |
| ABCC3      | 17 | 48753045  | NM_003786.3:c.2768G>A  | missense_variant   | 55.2 | 50.9 | 46   | 50.7 | 4.6 |
| TG         | 8  | 133899575 | NM_003235.4:c.1958G>A  | missense_variant   | 44.5 | 48.8 | 53.8 | 49.0 | 4.7 |
| KIR3DL1    | 19 | 55329901  | NM_013289.2:c.202A>G   | missense_variant   | 52.1 | 46   | 42.6 | 46.9 | 4.8 |
| HYDIN      | 16 | 70897039  | NM_032821.2:c.11515G>C | missense_variant   | 43.3 | 47.4 | 37.8 | 42.8 | 4.8 |
| TPSB2      | 16 | 1278767   | NM_024164.5:c.712G>A   | missense_variant   | 38.6 | 37.9 | 29.7 | 35.4 | 4.9 |

**Table S5**
